# Supplementary material
Source: PubMed Central journal article supplement (PMC7403359)
Supplement: mmc1.pdf [file mmc1.pdf]

**YMTHE, Volume 28**

**Supplemental Information**

**Efficient Nuclease-Directed  
Integration of Lentivirus Vectors  
into the Human Ribosomal DNA Locus**

**Diana Schenkwein, Saira Afzal, Alisa Nousiainen, Manfred Schmidt, and Seppo Ylä-Herttuala**

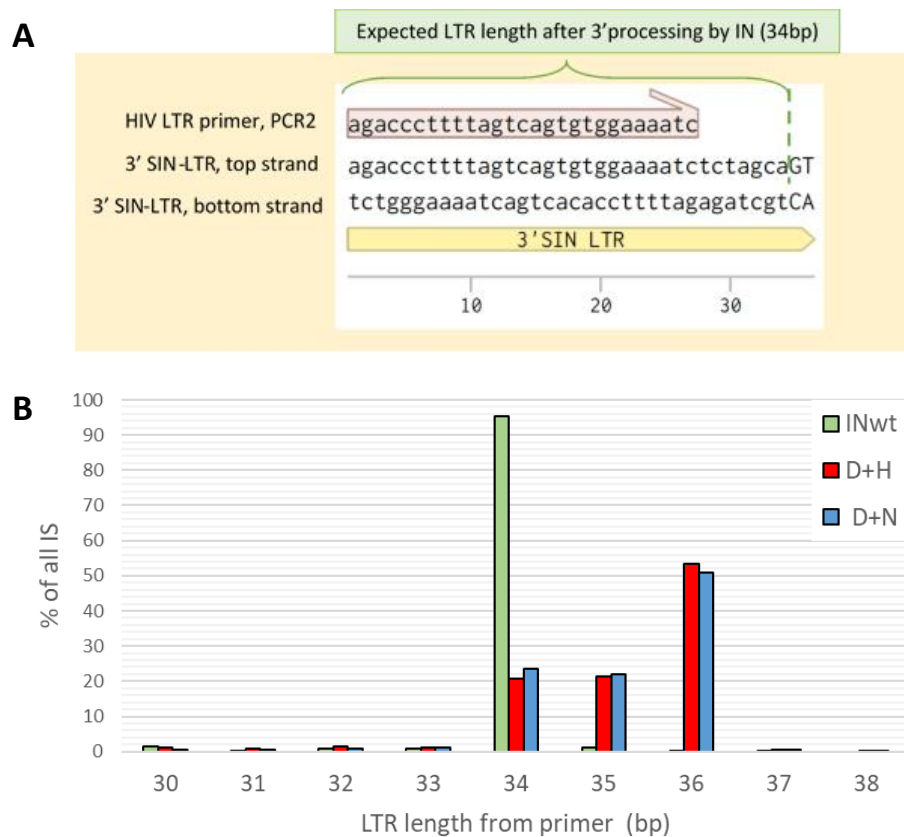

**Figure S1: An illustration of the 3'LTR and analysis of LTR length in the different vector groups. A)** An illustration of the 3'LTR present in the sequencing reads. The nested primer used in integration site extraction is shown on the top of the image. After IN-catalyzed processing of the LTRs and subsequent integration, the LTRs are expected to lack the terminal 3'GT-dinucleotide. After NHEJ-driven integration of the vector cDNA, the GT dinucleotide is frequently present. Vector integration after DNA repair through NHEJ is often accompanied with small insertions and deletions (indel mutations) at the cleaved site and at the termini of the inserted molecule, which can result in shorter and longer LTRs than expected. **B)** The proportions of LTRs with different lengths in the complete IS data of the three LV groups. LTR, long terminal repeat; SIN, self-inactivating LTR.

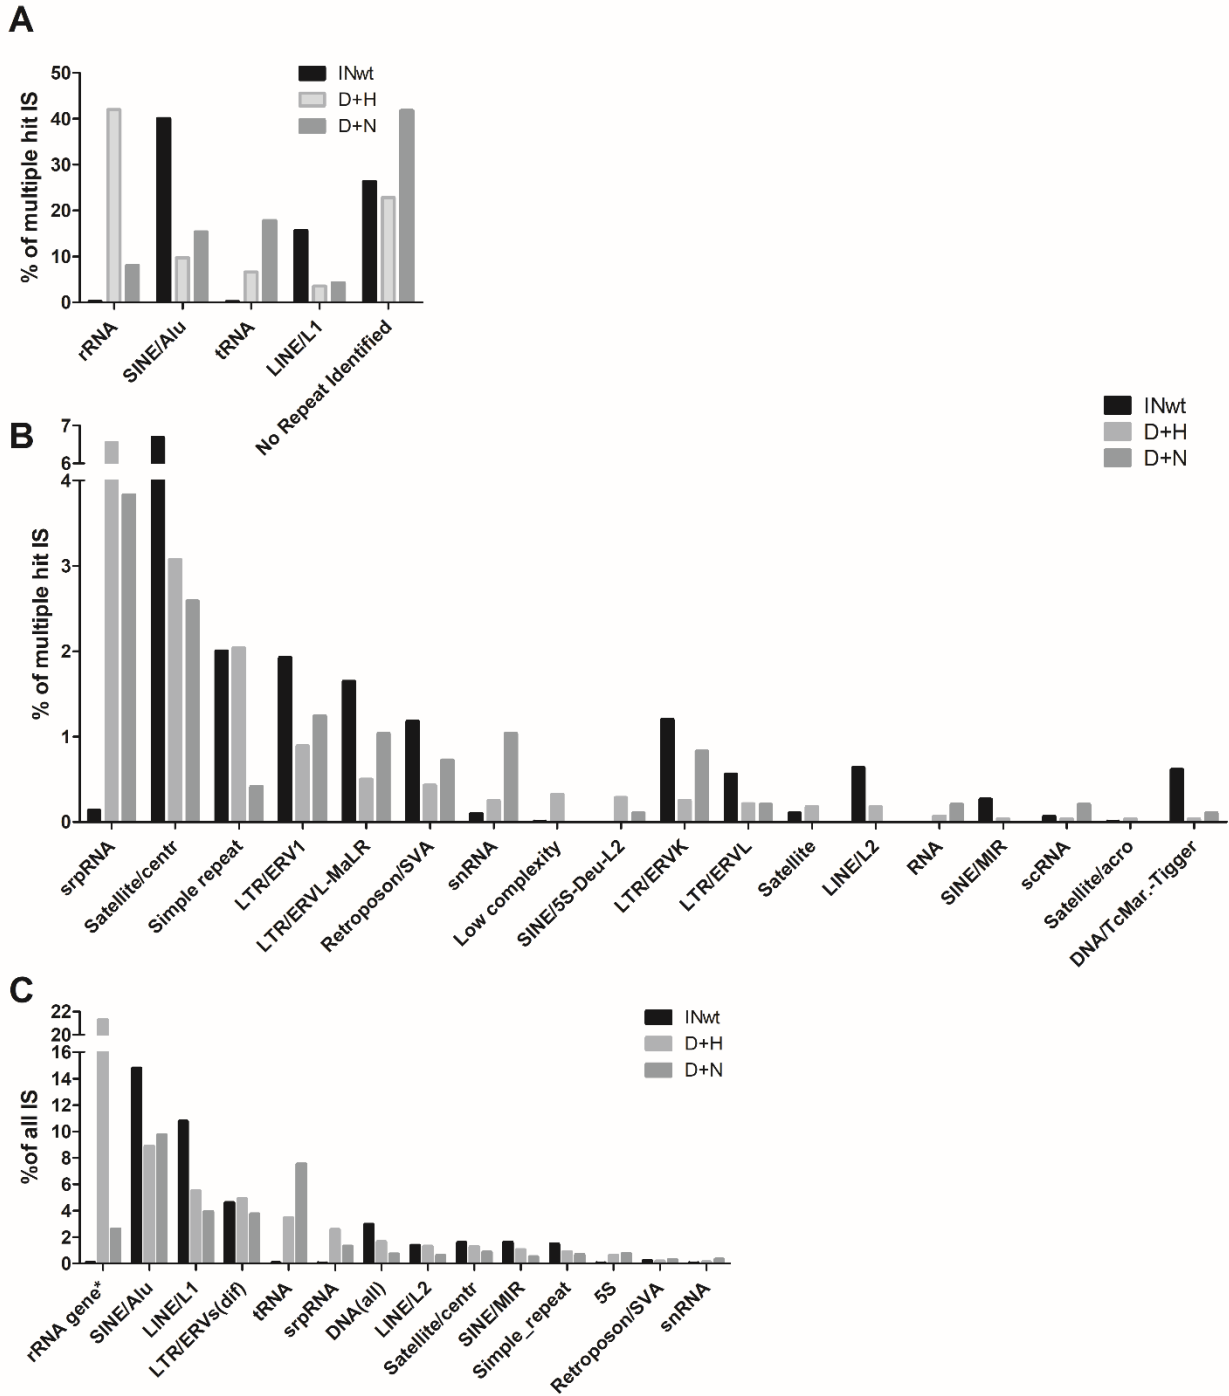

**Figure S2: Localization of multiple hit (MH)-integration sites in different repeat classes and the frequency of integration into different repeats in the total IS data.** **A:** Integration frequency in different repeat types in the MH-IS data (high frequency integration); **B:** Integration frequency in different repeat types of the MH-IS data (low frequency integration). **C:** Integration frequency within different repeat types in the total IS data of the LVs. In A and B the repeat identification and annotations from RepeatMasker were used. In C, rRNA gene repeats were annotated manually (marked with \*) due to the inability of the RepeatMasker to identify other rRNA gene features than the genes encoding for the molecules incorporated into mature ribosomes (See Figure 1 for pre-rRNA gene composition).

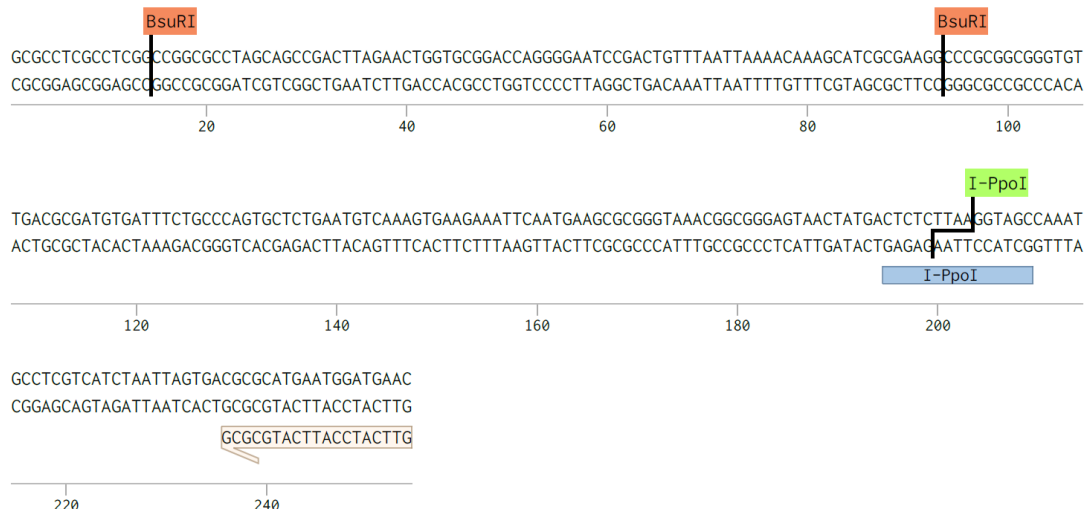

**Figure S3: Illustration of the genomic region where targeted integration was detected with ddPCR.** The I-PpoI site on chromosome 21 (Chr21:8444914-8444917) is shown with a green label and a blue box, and the primer annealing 32 bp downstream of the I-PpoI site is visible on the lowest sequence row. The cleavage sites for the BsuRI restriction enzyme, used to digest the genomic DNA prior to ddPCR, are shown. The length of the genomic region shown corresponds to the maximum length of the ddPCR product based on the extension time of the program.

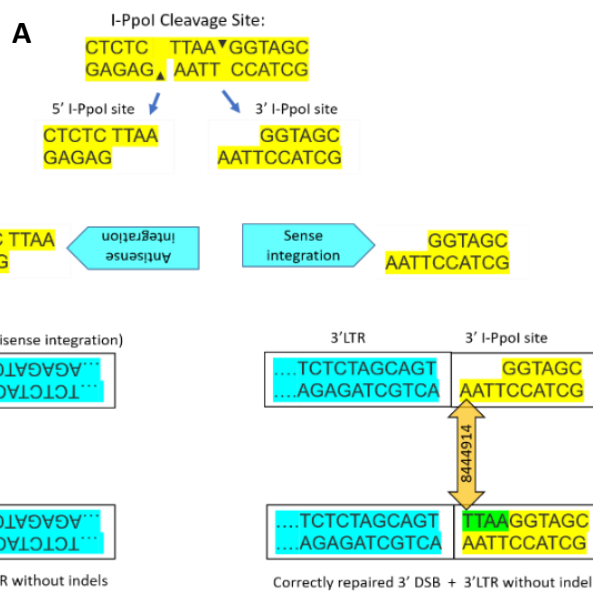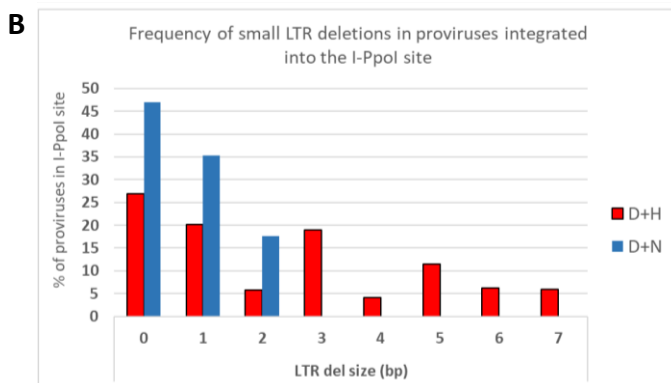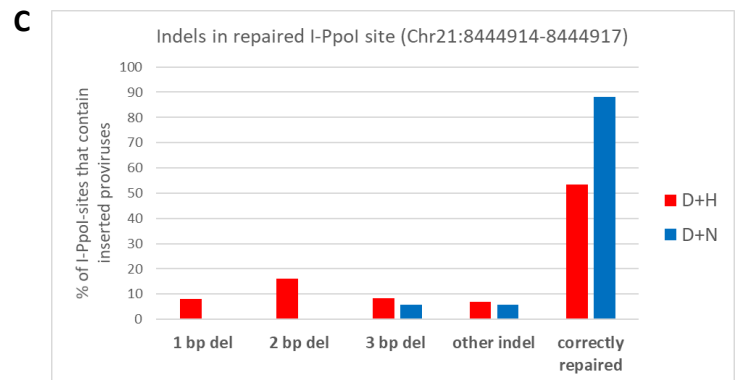

**Figure S4: Characterization of indels in proviruses inserted into the cleaved I-PpoI site on chromosome 21 (Chr21:8444914-8444917)** **A)** An illustration of provirus integration into the cleaved I-PpoI site with the genomic coordinates of the cleaved and repaired I-PpoI site nucleotides shown (orange arrows). The sequence of the unprocessed 3'LTR without deletions is highlighted with turquoise. **B)** Frequency of small deletions in the 3' LTRs of the inserted proviruses, where processing of the 3'GT dinucleotide by IN is not expected. **C)** Characterization of the I-PpoI site after vector insertion into the site. After error-free repair of the 5' or 3' I-PpoI sites the genomic sequence after the provirus matches exactly the nucleotides highlighted in yellow and green at the bottom of A.

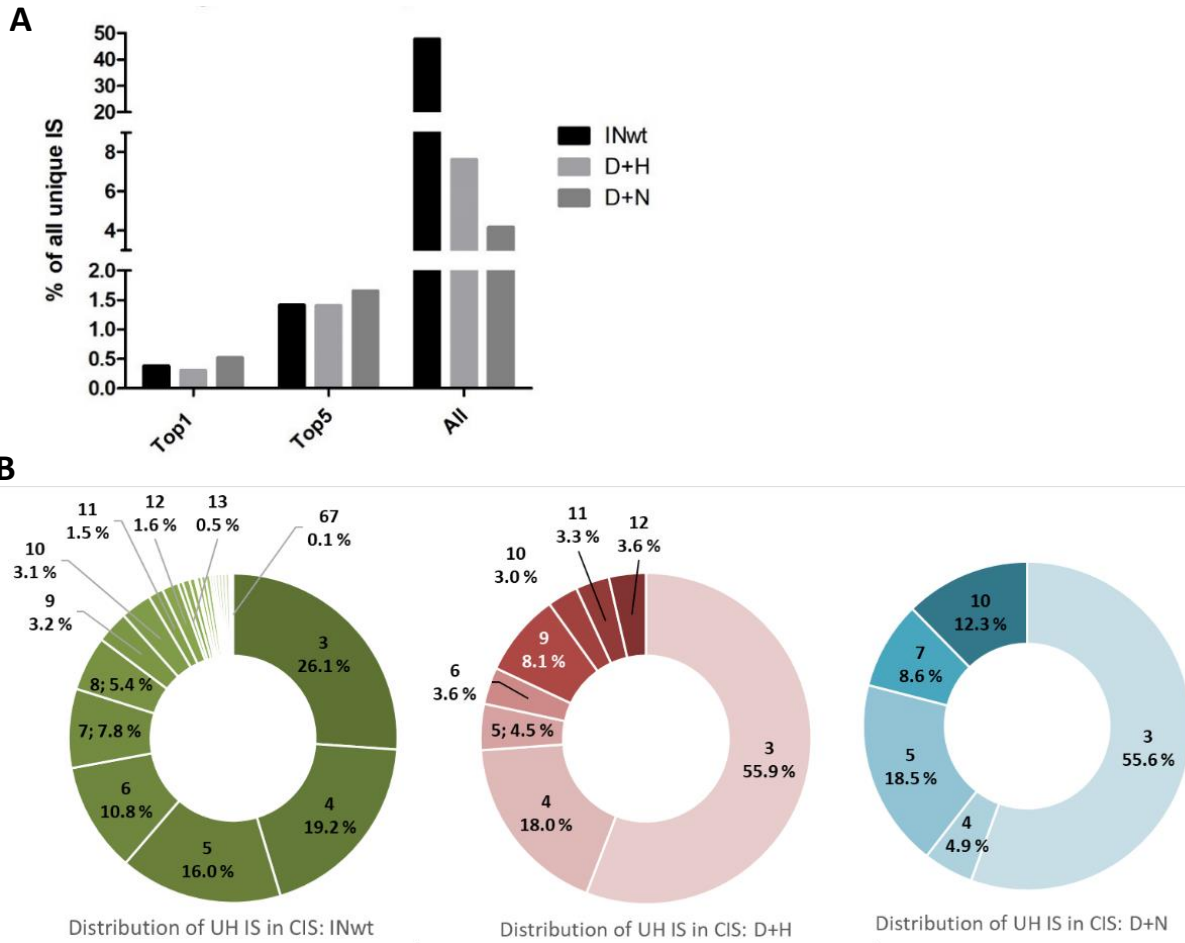

**Figure S5: Characterization of integration site localization into common insertion sites (CIS).** **A)** The proportion of CIS-associated IS of all unique IS in the strongest identified hotspot (Top1), in the five most targeted hotspots (Top5) and from all unique IS (All). **B)** Distribution of unique IS into CIS of different orders. The number shown above the percentage value is the CIS order (strength) that equals the number of IS within a CIS. For INwt LVs, CIS of the orders 14 to 66 are not shown for clarity. The percentages denote the fraction of all IS within CIS of the specified order of all CIS-associated IS.

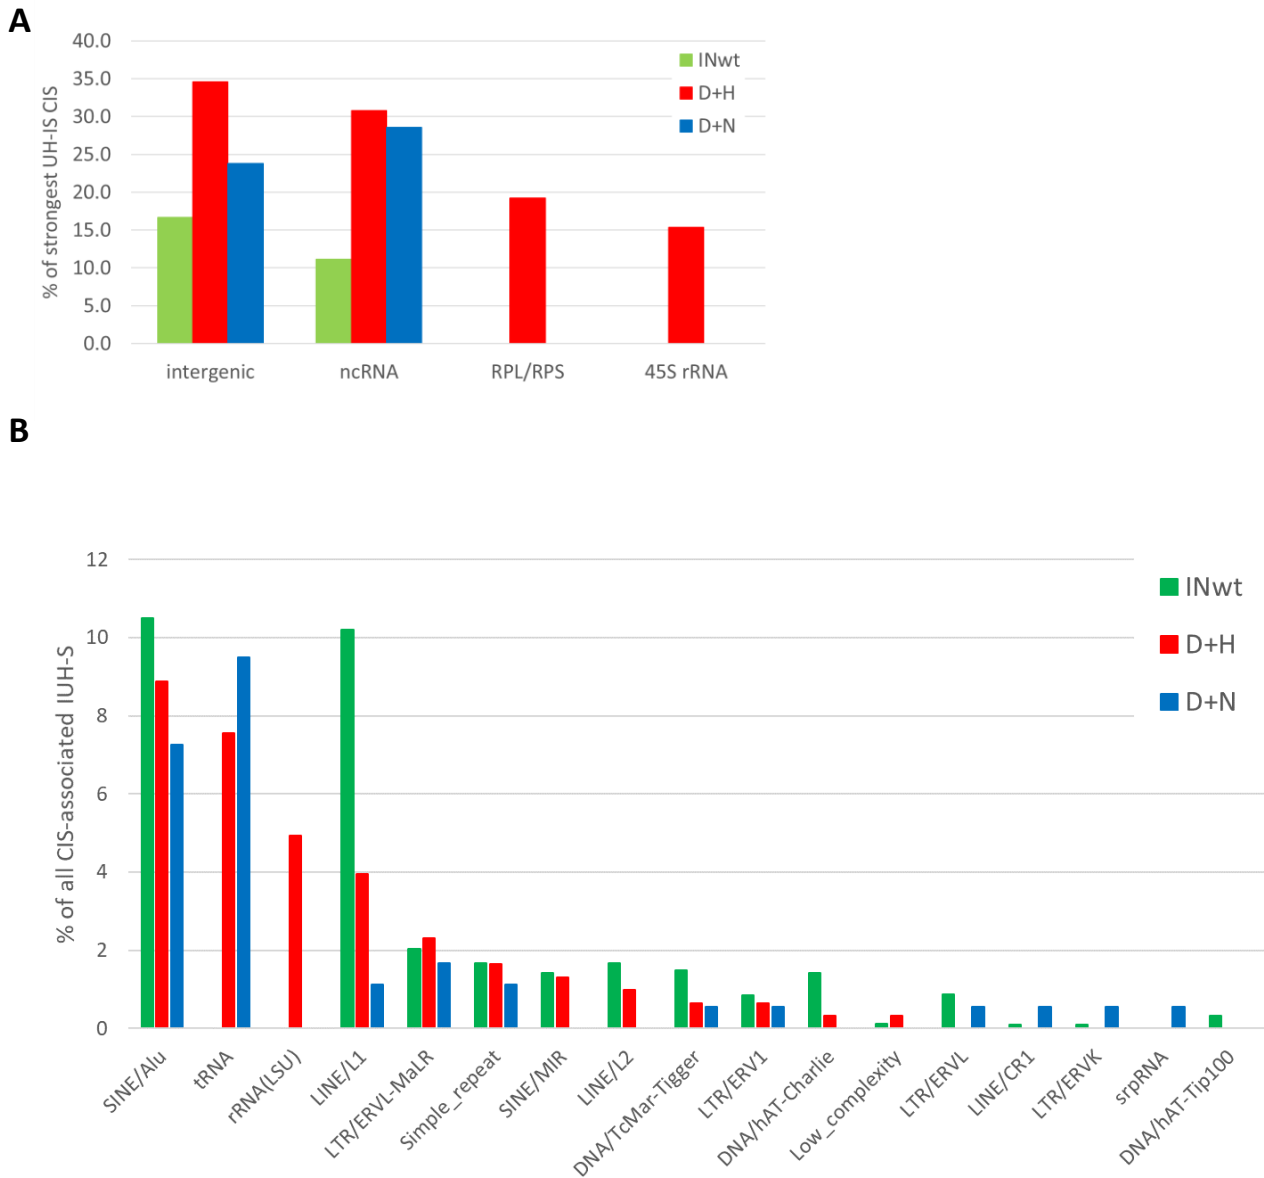

**Figure S6: Characterization of the differences in preferential integration target site selection between LVs containing the D+H fusion protein, the D+N fusion protein or INwt. A)** The proportion of selected features present in the ~15 most targeted integration hotspots among the unique IS (UH-IS) (Table 1) of the different LVs. **B)** The proportion of different repeat types present in CIS-associated unique IS reads. The numbers of CIS-contained IS are: 8450 for LV INwt; 333 for LV D+H and 81 for LV D+N. CIS: common integration site; LSU: ribosome large subunit -contained rRNA (28S rRNA gene).

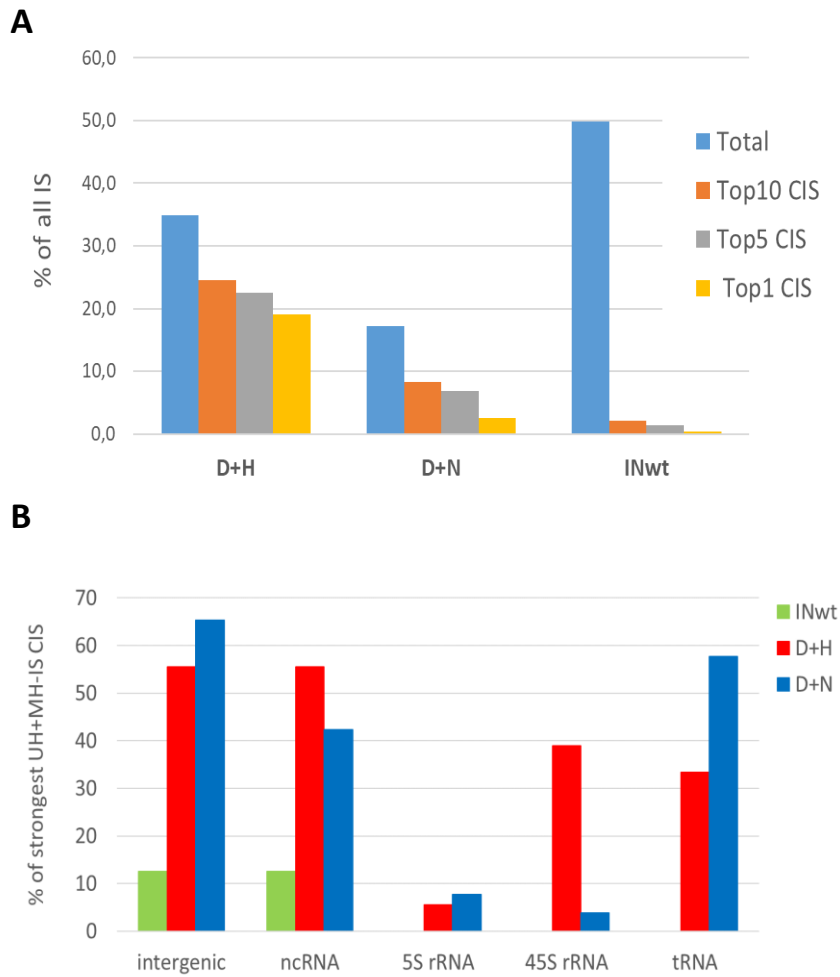

**Figure S7: Characterization of the tendency of different LVs to form integration hotspots when both unique and multiple hit integration sites (UH and MH IS, respectively) are considered, and the differences between LVs in targeting specific features for integration. A)** The proportion of CIS-associated IS of all IS in the strongest identified hotspot (Top1 CIS), in the ten, five or first most targeted hotspots (Top10 CIS, Top5 CIS and Top1 CIS, respectively) and from all IS (Total). **B)** The proportion of selected features present in the ~15 most targeted integration hotspots analyzed from the complete IS data of the different LVs (Table 2). The numbers of CIS-associated IS are 2506 for LV D+H; 498 for LV D+N and 10367 for LV INwt.

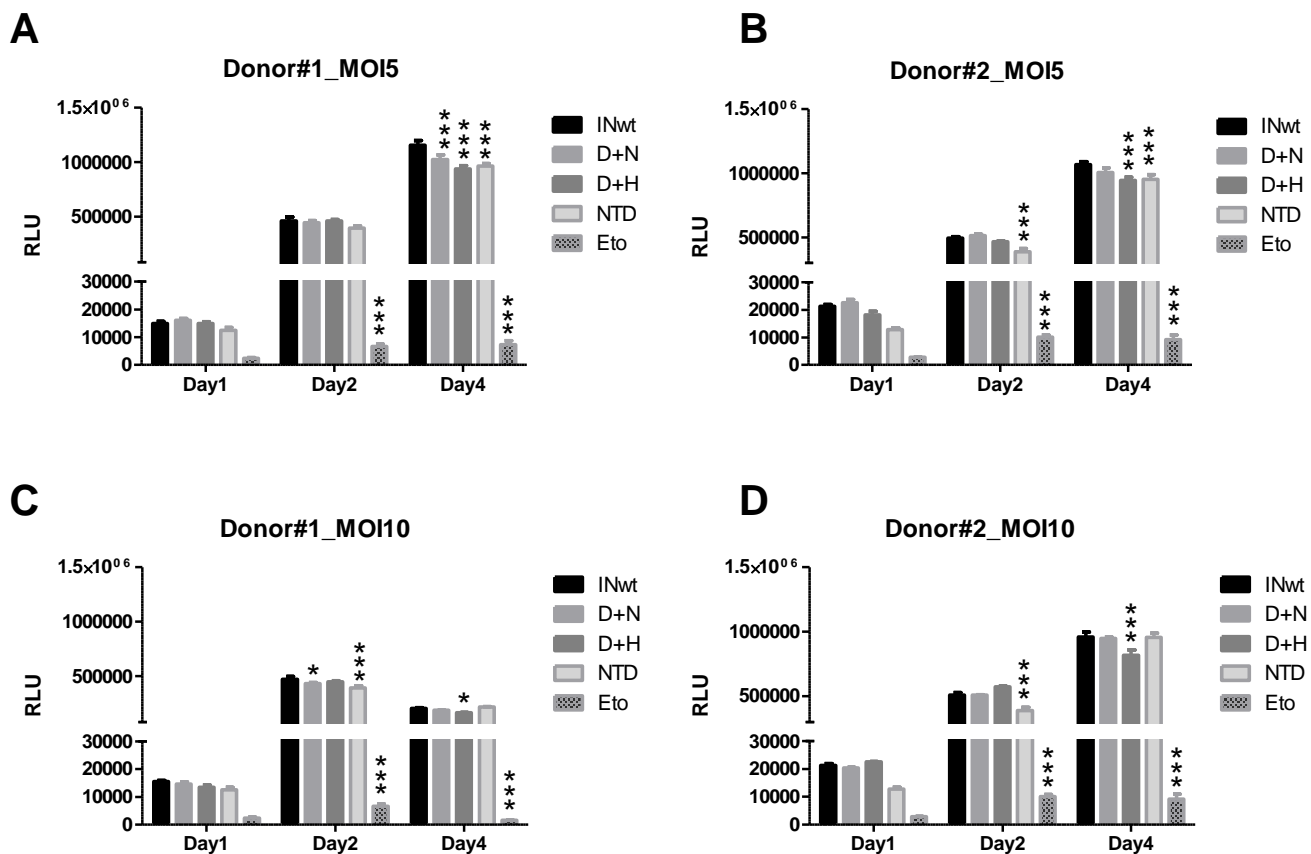

**Figure S8: Viability of primary human T cells transduced with different LVs at days one to four post transduction.** A) and B): viability of T cells extracted from donors 1 (A) and 2 (B) transduced with 5k vp/cell. C) and D): viability of T cells extracted from donors 1 (C) and 2 (D) transduced with 10k vp/cell. All statistical comparisons were done by comparing other groups to the INwt control. \*:p<0.05; \*\*\*:p<0.001; RLU: relative light unit; Eto: etoposide; NTD: non-transduced cells. The RLU values represent means (with SEM) of measurements from triplicate wells.



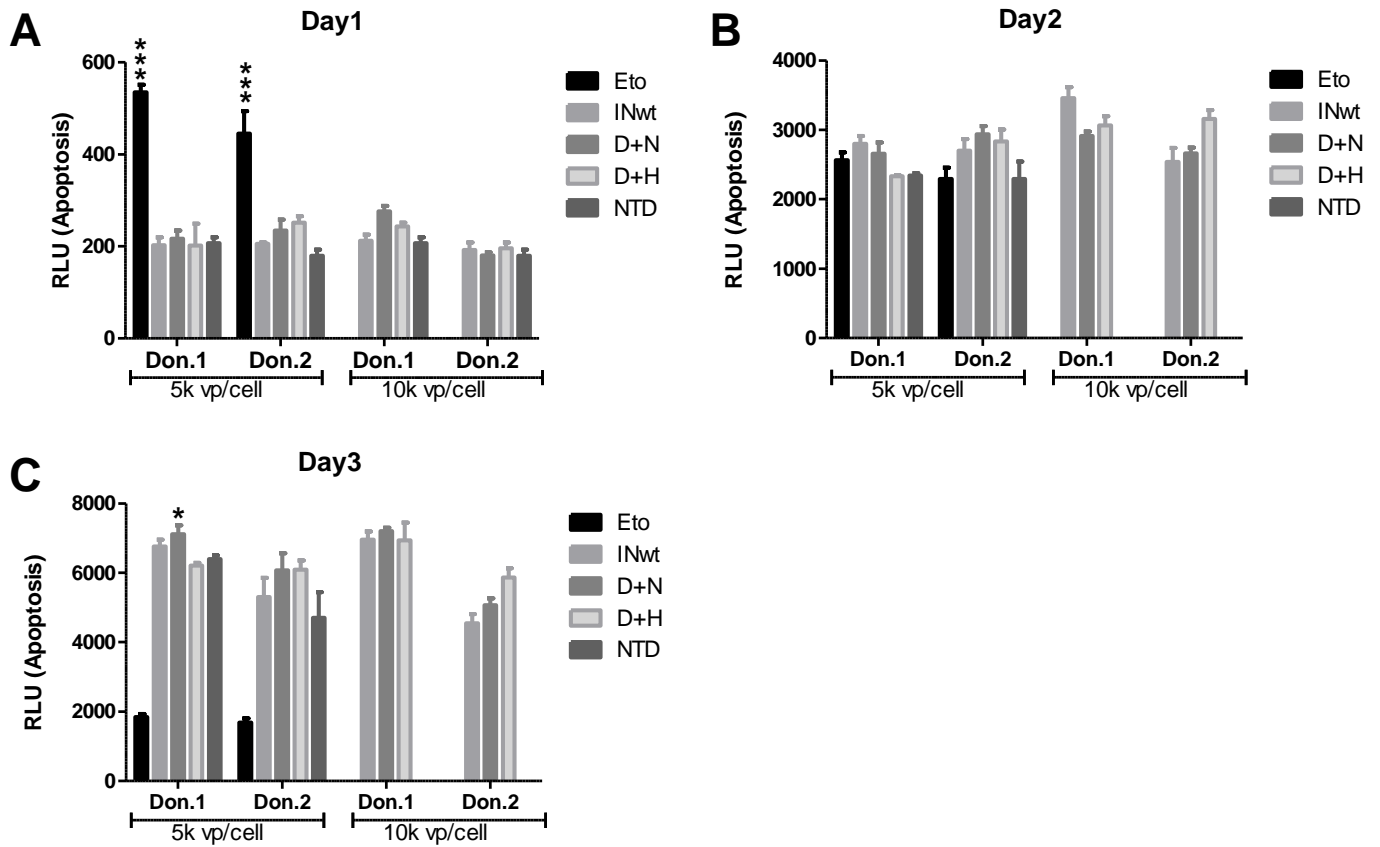

**Figure S9: Measurement of apoptosis in primary human T cells transduced with different LVs.** Apoptotic cells were detected at days one (A), two (B) and three (C) post transduction from primary T cells transduced with 5k and 10k vp/cell (shown below the X-axis). All vector-transduced cells were compared to the non-transduced control (NTD) analyzing each time point separately. \*:p<0.05; \*\*\*:p<0.001; RLU: relative light unit; Eto: etoposide; NTD: non-transduced cells; vp: vector particle; Don: donor. The RLU values represent means (with SEM) of measurements from triplicate wells.

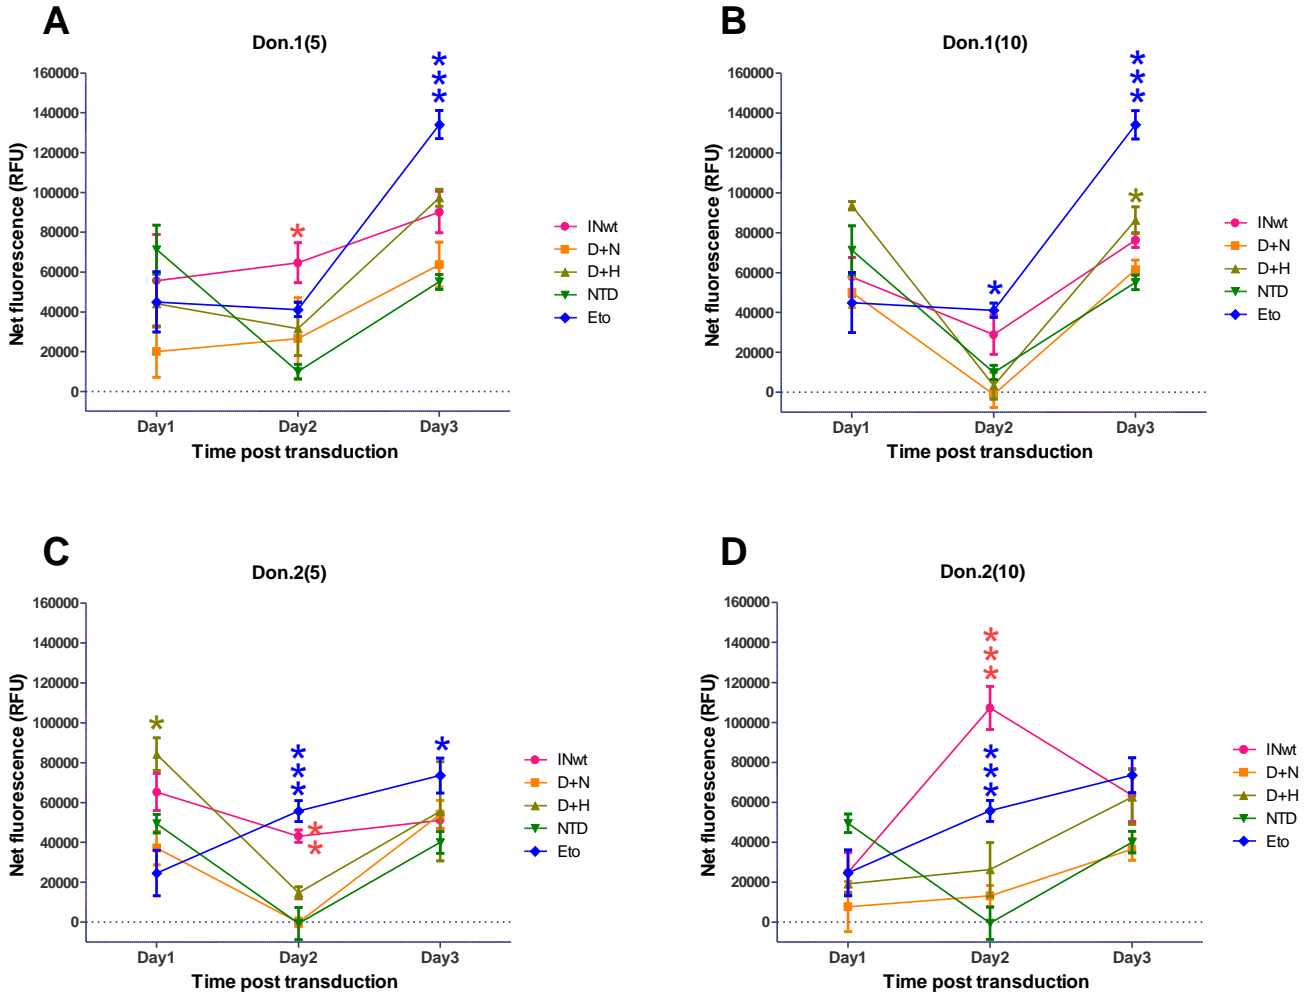

**Figure S10: Measurement of necrosis at days one to three post transduction in primary human T cells transduced with different LVs.** A: Detection of necrotic cells in donor 1-derived T cells transduced with 5k vector particles (vp) per cell. B: Detection of necrotic cells in donor 1-derived T cells transduced with 10k vp/cell. C: Detection of necrotic cells in donor 2-derived T cells transduced with 5k vp/cell. D: Detection of necrotic cells in donor 2-derived T cells transduced with 10k vp/cell. All vector groups were compared to the non-transduced (NTD) cell control. \*:p<0.05; \*\*:p<0.01; \*\*\*:p<0.001; RFU: relative fluorescence unit; Eto: etoposide; NTD: non-transduced cells; Don., donor. The values shown represent means (with SEM) of net fluorescence from triplicate wells per vector group.

**Table S1:** Full 15 bp I-PpoI recognition and cleavage sites in the human genome (Dec. 2013 GRCh38/hg38).

i: intron e: exon. LSU: large subunit of the ribosome that contains the 28S rRNA.

| Chr | Locus                    | Gene        | i/e        | strand | Repeat   | Nearest gene                  |
|-----|--------------------------|-------------|------------|--------|----------|-------------------------------|
| 1   | chr1:57987624-57987610   | DAB1        | i1         | minus  | na       |                               |
| 1   | chr1:237603118-237603132 | RVR2        | i35        | plus   | LSU rRNA |                               |
| 2   | chr2:132279870-132279856 | intergenic  |            | minus  | LSU rRNA | ANKRD30BL                     |
| 3   | chr3:56330051-56330037   | ERC2        | i2         | minus  | na       |                               |
| 7   | chr7:69062508-69062522   | intergenic  |            | plus   | LSU rRNA | LOC100507468                  |
| 8   | chr8:69690276-69690262   | SLCO5A1     | i6         | minus  | LSU rRNA |                               |
| 11  | chr11:77886539-77886553  | INTS4/AAMDC | i21/i4,5,6 | plus   | LSU rRNA |                               |
| 20  | chr20:30512873-30512859  | intergenic  |            | minus  | LSU rRNA | MLLT10P1 (/5.8S rRNA/ FRG1BP) |
| 21  | chr21:8217639-8217653    | RNA28SN2    | e1         | plus   | LSU rRNA |                               |
| 21  | chr21:8400677-8400691    | RNA28SN3    | e1         | plus   | LSU rRNA |                               |
| 21  | chr21:8444909-8444923    | RNA28SN1    | e1         | plus   | LSU rRNA |                               |
| X   | chrX:109054229-109054243 | intergenic  |            | plus   | LSU rRNA | MIR6087                       |

**Table S2:** Details of the starting material used for integration site sequencing.

| LV   | Integrase content in LV                        | MOI | % EGFP+ cells* | Sampling time point (days post td.) | ng of gDNA in MuA rxn | Linker # | MID # |
|------|------------------------------------------------|-----|----------------|-------------------------------------|-----------------------|----------|-------|
| D+H  | IN <sub>D64V</sub> +IN-I-PpoI <sub>H78A</sub>  | 4   | 93,05          | 2                                   | 242,34                | 4        | 13    |
|      |                                                |     |                | 2                                   | 198                   | 6        | 14    |
| D+N  | IN <sub>D64V</sub> +IN-I-PpoI <sub>N119A</sub> | 4   | 97,02          | 3                                   | 129,78                | 7        | 15    |
|      |                                                |     |                | 3                                   | 247,02                | 8        | 16    |
| INwt | INwt                                           | 1   | 82,93          | 3                                   | 238,74                | 9        | 17    |
|      |                                                |     |                | 3                                   | 163,98                | 10       | 18    |

LV: lentivirus vector; IN: integrase; td: transduction; gDNA: genomic DNA; rxn: reaction; MID: molecular identifier; MOI: multiplicity of infection. \*: EGFP expression measured with flow cytometry from triplicate wells at the day of gDNA extraction.

**Table S3:** Localization of integration sites with respect oncogenes and their upstream and downstream regions.

|      | UH IS in or near oncogenes (% of all IS) | Intragenic IS                     |                          | Intergenic IS                      |                                         |                                           | Med. oncogene Length. Kb |
|------|------------------------------------------|-----------------------------------|--------------------------|------------------------------------|-----------------------------------------|-------------------------------------------|--------------------------|
|      |                                          | IS within oncogenes (% of all IS) | Median dist. to TSS (kb) | % of interg. IS upstream of Oncog. | Median dist. (kb) to TSS of upstream IS | Median dist. (kb) to TSS of downstream IS |                          |
| INwt | 15,8                                     | 13,2                              | 55,4                     | 57,2                               | 52,0                                    | 40,6                                      | 123,0                    |
| D+H  | 10,4                                     | 8,1                               | 54,2                     | 53,7                               | 37,2                                    | 39,8                                      | 115,2                    |
| D+N  | 12,0                                     | 9,5                               | 40,1                     | 49,3                               | 34,1                                    | 55,3                                      | 99,5                     |

UH IS: unique hit integration site. TSS: transcription start site. dist: distance. Med., median.

**Table S4:** Results of the ddPCR measurements of targeted integration within a 235 bp window around the 28S rRNA gene -contained I-PpoI site in MRC-5 cells.

| LV                 | Experiment (replicate) | Copy number per cell          |               |                |                    |                         |                    |                          | Targeted integrations of all integrated vector forms |                   |            |                    |
|--------------------|------------------------|-------------------------------|---------------|----------------|--------------------|-------------------------|--------------------|--------------------------|------------------------------------------------------|-------------------|------------|--------------------|
|                    |                        | Targeted 28S rRNA integration |               |                | All vector genomes | Episomal vector genomes | Production plasmid | Integrated vector copies | Targeted integration                                 |                   |            |                    |
|                    |                        | 28S int. Forw.                | 28S int. Rev. | 28S int. Total | NHEJ               | 1-LTR                   | pLV                | NHEJ-1-LTR-pLV           | % of integrated                                      | Average/replicate | Average/LV | LV                 |
| IN <sub>D64V</sub> | 1                      | 0.000                         | 0.00          | 0.00           | 0.26               | 0.20                    | 0.01               | 0.05                     | 0.0%                                                 | 0.0%              | 0.0%       | IN <sub>D64V</sub> |
|                    |                        | 0.000                         | 0.00          | 0.00           | 0.10               | 0.08                    | 0.00               | 0.02                     | 0.0%                                                 |                   |            |                    |
|                    |                        | 0.000                         | 0.00          | 0.00           | 0.14               | 0.12                    | 0.01               | 0.01                     | 0.0%                                                 |                   |            |                    |
|                    | 2                      | 0.000                         | 0.00          | 0.00           | 0.66               | 0.46                    | 0.54               | -0.35                    | 0.0%                                                 |                   |            |                    |
|                    |                        | 0.000                         | 0.00          | 0.00           | 0.47               | 0.24                    | 0.02               | 0.21                     | 0.1%                                                 |                   |            |                    |
|                    |                        | 0.000                         | 0.00          | 0.00           | 0.75               | 0.12                    | 0.07               | 0.57                     | 0.0%                                                 |                   |            |                    |
| IN <sub>wt</sub>   | 1                      | 0.017                         | 0.01          | 0.03           | 13.67              | 0.88                    | 0.06               | 12.73                    | 0.2%                                                 | 0.1%              | 0.1%       | IN <sub>wt</sub>   |
|                    |                        | 0.010                         | 0.00          | 0.01           | 13.34              | 0.92                    | 0.09               | 12.33                    | 0.1%                                                 |                   |            |                    |
|                    |                        | 0.006                         | 0.01          | 0.01           | 14.29              | 0.78                    | 0.09               | 13.42                    | 0.1%                                                 |                   |            |                    |
|                    | 2                      | 0.006                         | 0.02          | 0.02           | 39.18              | 7.43                    | 0.46               | 31.29                    | 0.1%                                                 |                   |            |                    |
|                    |                        | 0.014                         | 0.01          | 0.02           | 54.60              | 12.02                   | 0.68               | 41.90                    | 0.1%                                                 |                   |            |                    |
|                    |                        | 0.023                         | 0.03          | 0.05           | 59.92              | 17.48                   | 0.40               | 42.04                    | 0.1%                                                 |                   |            |                    |
| D+N                | 1                      | 0.001                         | 0.00          | 0.00           | 1.73               | 1.01                    | 0.13               | 0.59                     | 0.1%                                                 | 0.2%              | 0.2%       | D+N                |
|                    |                        | 0.000                         | 0.00          | 0.00           | 2.26               | 1.47                    | 0.02               | 0.77                     | 0.0%                                                 |                   |            |                    |
|                    |                        | 0.001                         | 0.00          | 0.00           | 1.76               | 1.05                    | 0.03               | 0.68                     | 0.6%                                                 |                   |            |                    |
|                    | 2                      | 0.000                         | 0.00          | 0.00           | 1.08               | 0.21                    | 0.00               | 0.87                     | 0.0%                                                 |                   |            |                    |
|                    |                        | 0.000                         | 0.00          | 0.00           | 0.90               | 0.26                    | 0.03               | 0.61                     | 0.2%                                                 |                   |            |                    |
|                    |                        | 0.000                         | 0.00          | 0.00           | 1.39               | 0.49                    | 0.04               | 0.86                     | 0.0%                                                 |                   |            |                    |
| D+H                | 1                      | 0.047                         | 0.05          | 0.10           | 3.41               | 3.19                    | 0.05               | 0.17                     | 58.8%                                                | 25.3%             | 20.9%      | D+H                |
|                    |                        | 0.036                         | 0.03          | 0.06           | 5.38               | 3.78                    | 0.04               | 1.56                     | 4.1%                                                 |                   |            |                    |
|                    |                        | 0.042                         | 0.05          | 0.09           | 2.58               | 1.87                    | 0.02               | 0.69                     | 13.0%                                                |                   |            |                    |
|                    | 2                      | 0.268                         | 0.24          | 0.51           | 11.88              | 9.72                    | 0.14               | 2.02                     | 25.1%                                                |                   |            |                    |
|                    |                        | 0.269                         | 0.23          | 0.50           | 11.85              | 8.37                    | 0.21               | 3.28                     | 15.1%                                                |                   |            |                    |
|                    |                        | 0.312                         | 0.25          | 0.56           | 10.32              | 3.91                    | 0.16               | 6.26                     | 9.0%                                                 |                   |            |                    |

NHEJ: Non-homologous end joining; int.: integration; 28S: 28S rRNA gene; Forw.: forward; Rev.:Reverse; LTR: long terminal repeat

**Table S5:** ddPCR-based measurement of targeted integration within a 235 bp window around the 28S rRNA gene - contained I-PpoI site in selected and unselected hTERT-RPE1 cells.

| Sample                | Copy number per cell |                  |                         |                          | Targeted integrations of all integrated vector forms |                     |                     |      |
|-----------------------|----------------------|------------------|-------------------------|--------------------------|------------------------------------------------------|---------------------|---------------------|------|
|                       | All vector genomes   | 28S integrations | Episomal vector genomes | Integrated vector copies | Targeted integration                                 |                     |                     |      |
|                       | WPRE                 | 28S int. Forw.   | 1-LTR                   | WPRE-1-LTR               | % of integrated                                      | Average targeting % | Actual targeting %* |      |
| Unselected (d13 p.td) | D+H                  | 0.52             | 0.01                    | 0.20                     | 0.32                                                 | 4.3%                | 4.4%                | 8.8% |
|                       |                      | 0.43             | 0.01                    | 0.16                     | 0.26                                                 | 3.8%                |                     |      |
|                       |                      | 0.50             | 0.01                    | 0.20                     | 0.30                                                 | 4.4%                |                     |      |
|                       |                      | 0.56             | 0.02                    | 0.19                     | 0.37                                                 | 5.1%                |                     |      |
|                       | IN <sub>D64V</sub>   | 0.21             | 0.00                    | 0.13                     | 0.08                                                 | 0.0%                | 0.0%                | 0.0% |
|                       |                      | 0.21             | 0.00                    | 0.07                     | 0.13                                                 | 0.0%                |                     |      |
|                       |                      | 0.21             | 0.00                    | 0.08                     | 0.13                                                 | 0.0%                |                     |      |
| Selected (d15 p.td)   | D+H (replicate 1)    | 2.96             | 0.07                    | 1.11                     | 1.85                                                 | 3.6%                | 4.2%                | 8.4% |
|                       |                      | 3.12             | 0.08                    | 0.79                     | 2.33                                                 | 3.4%                |                     |      |
|                       |                      | 2.56             | 0.08                    | 0.88                     | 1.68                                                 | 5.0%                |                     |      |
|                       |                      | 2.78             | 0.07                    | 1.22                     | 1.56                                                 | 4.7%                |                     |      |
|                       | D+H (replicate 2)    | 3.53             | 0.06                    | 1.50                     | 2.03                                                 | 3.1%                | 3.3%                | 6.6% |
|                       |                      | 3.51             | 0.07                    | 1.46                     | 2.06                                                 | 3.5%                |                     |      |
|                       |                      | 3.42             | 0.07                    | 1.40                     | 2.02                                                 | 3.7%                |                     |      |
|                       |                      | 4.00             | 0.07                    | 1.59                     | 2.41                                                 | 2.8%                |                     |      |
|                       | IN <sub>D64V</sub>   | 1.68             | 0.00                    | 0.35                     | 1.32                                                 | 0.1%                | 0.0%                | 0.1% |
|                       |                      | 1.67             | 0.00                    | 0.31                     | 1.36                                                 | 0.0%                |                     |      |
|                       |                      | 1.64             | 0.00                    | 0.22                     | 1.41                                                 | 0.0%                |                     |      |
|                       |                      | 1.71             | 0.00                    | 0.32                     | 1.39                                                 | 0.0%                |                     |      |
|                       |                      | 1.71             | 0.00                    | 0.32                     | 1.39                                                 | 0.0%                |                     |      |

\* Expected integration targeting efficiency (according to MRC-5 experiments) if 28S-targeted integration was also studied in reverse orientation; d: day; p.td: post transduction; LV: lentivirus vector

**Table S6:** Comparison of lentivirus vector common integration site genes in human mouse hematochimeras with the common integration sites identified in this study using the unique integration sites of LV INwt.

| CIS-associated gene <sup>23</sup> | Alias gene name | Gene present in a CIS of LV INwt? | CIS order of LV INwt |
|-----------------------------------|-----------------|-----------------------------------|----------------------|
| PACS                              |                 | yes                               | 44                   |
| RAB40C                            |                 | yes                               | 33                   |
| HLA                               |                 | yes (HLA-E)                       | 27                   |
| NPLOC4                            |                 | yes                               | 25                   |
| SPDYC                             |                 | yes                               | 17                   |
| SAPS2                             | PPP6R2          | yes                               | 15                   |
| ZGPAT                             |                 | yes                               | 12                   |
| FBXL11                            | KDM2A           | yes                               | 9                    |
| ANKFY1                            |                 | yes                               | 8                    |
| RPA1                              |                 | yes                               | 8                    |
| SMYD4                             |                 | yes                               | 8                    |
| QRICH1                            |                 | yes                               | 8                    |
| USP48                             |                 | yes                               | 7                    |
| FCHSD2                            |                 | yes                               | 7                    |
| SMARCC1                           |                 | yes                               | 7                    |
| NSD1                              |                 | yes                               | 6                    |
| CENTD2                            | ARAP1           | yes                               | 4                    |
| FRYL                              |                 | yes                               | 4                    |
| CARD8                             |                 | yes                               | 4                    |
| EIF2C3                            | AGO3            | yes                               | 3                    |
| PSCD1                             | CYTH1           | yes                               | 3                    |
| NF1                               |                 | yes                               | 3                    |
| ABCA3                             |                 | no                                | na                   |
| CBL                               |                 | no                                | na                   |
| CDC27                             |                 | no                                | na                   |
| HORMAD2                           |                 | no                                | na                   |
| SP1                               |                 | no                                | na                   |
| TAPBP                             |                 | no                                | na                   |
| VAV1                              |                 | no                                | na                   |
| WDR82                             |                 | no                                | na                   |
| GPATCH8                           |                 | no                                | na                   |

LV: lentivirus vector; CIS: common integration site; na: not applicable.

**Table S7:** HIV-1 recurrent integration genes and LV INwt UH-CIS that are within a 100 kb distance from one another.

**Table S8:** DdPCR results of targeted integration detection in primary T cells at day two post transduction.

| Day 2 p. td.                           | Copy number per cell |                          |            |                    |                         |                           | Targeted             |         |
|----------------------------------------|----------------------|--------------------------|------------|--------------------|-------------------------|---------------------------|----------------------|---------|
|                                        | All vector genomes   | Targeted 28S integration |            | Production plasmid | Episomal vector genomes | Integrated vector genomes | Targeted integration |         |
| Sample                                 | NHEJ                 | 28Sint                   | Rev-28Sint | pLV                | 1-LTR                   | NHEJ-pLV-1-LTR            | % targeted           | Average |
| Donor 1 NTD-1                          | 0.00                 | 0.00                     | 0.00       | 0.00               | 0.00                    | 0.00                      | 0.0%                 | 0.0%    |
|                                        | 0.00                 | 0.00                     | 0.00       | 0.00               | 0.00                    | 0.00                      | 0.0%                 |         |
| Donor 1 NTD-2                          | 0.01                 | 0.00                     | 0.00       | 0.00               | 0.00                    | 0.01                      | 0.0%                 | 0.0%    |
|                                        | 0.00                 | 0.00                     | 0.00       | 0.00               | 0.00                    | 0.00                      | 0.0%                 |         |
| Donor 1 INwt, replicate 1, 5K VP/cell  | 28.31                | 0.01                     | 0.01       | 0.47               | 4.32                    | 23.52                     | 0.1%                 | 0.0%    |
|                                        | 28.90                | 0.00                     | 0.00       | 0.44               | 3.49                    | 24.97                     | 0.0%                 |         |
| Donor 1 INwt, replicate 2, 5K VP/cell  | 35.43                | 0.01                     | 0.00       | 0.65               | 4.69                    | 30.09                     | 0.0%                 | 0.0%    |
|                                        | 32.73                | 0.01                     | 0.00       | 0.63               | 5.61                    | 26.49                     | 0.0%                 |         |
| Donor 1 INwt, replicate 1, 10K VP/cell | 31.74                | 0.01                     | 0.00       | 0.57               | 4.84                    | 26.33                     | 0.0%                 | 0.0%    |
|                                        | 35.85                | 0.00                     | 0.00       | 0.59               | 4.53                    | 30.73                     | 0.0%                 |         |
| Donor 1 INwt, replicate 2, 10K VP/cell | 32.83                | 0.01                     | 0.00       | 0.47               | 4.19                    | 28.17                     | 0.0%                 | 0.0%    |
|                                        | 33.50                | 0.01                     | 0.00       | 0.45               | 4.47                    | 28.58                     | 0.0%                 |         |
| Donor 1 D+H, replicate 1, 5K VP/cell   | 17.89                | 0.02                     | 0.03       | 0.51               | 7.53                    | 9.85                      | 0.5%                 | 0.4%    |
|                                        | 19.69                | 0.03                     | 0.02       | 0.48               | 6.64                    | 12.56                     | 0.4%                 |         |
| Donor 1 D+H, replicate 2, 5K VP/cell   | 17.46                | 0.02                     | 0.02       | 0.53               | 5.68                    | 11.25                     | 0.3%                 | 0.6%    |
|                                        | 16.15                | 0.02                     | 0.03       | 0.52               | 6.84                    | 8.79                      | 0.6%                 |         |
| Donor 1 D+H, replicate 1, 10K VP/cell  | 29.27                | 0.05                     | 0.05       | 0.68               | 11.56                   | 17.03                     | 0.6%                 | 0.6%    |
|                                        | 31.36                | 0.04                     | 0.07       | 0.73               | 11.19                   | 19.43                     | 0.6%                 |         |
| Donor 1 D+H, replicate 2, 10K VP/cell  | 28.12                | 0.05                     | 0.05       | 0.63               | 11.06                   | 16.44                     | 0.6%                 | 0.0%    |
|                                        | 27.72                | 0.04                     | 0.05       | 0.64               | 12.51                   | 14.57                     | 0.6%                 |         |
| Donor 2 NTD-1                          | 0.00                 | 0.00                     | 0.00       | 0.00               | 0.00                    | 0.00                      | 0.0%                 | 0.0%    |
|                                        | 0.00                 | 0.00                     | 0.00       | 0.00               | 0.00                    | 0.00                      | 0.0%                 |         |
| Donor 2 NTD-2                          | 0.00                 | 0.00                     | 0.00       | 0.00               | 0.00                    | 0.00                      | 0.0%                 | 0.0%    |
|                                        | 0.00                 | 0.00                     | 0.00       | 0.00               | 0.00                    | 0.00                      | 0.0%                 |         |
| Donor 2 INwt, replicate 1, 5K VP/cell  | 15.26                | 0.00                     | 0.00       | 0.29               | 1.51                    | 13.46                     | 0.0%                 | 0.0%    |
|                                        | 12.39                | 0.00                     | 0.00       | 0.23               | 1.52                    | 10.63                     | 0.0%                 |         |
| Donor 2 INwt, replicate 2, 5K VP/cell  | 16.53                | 0.00                     | 0.00       | 0.31               | 2.31                    | 13.90                     | 0.0%                 | 0.0%    |
|                                        | 17.13                | 0.00                     | 0.00       | 0.32               | 2.32                    | 14.50                     | 0.0%                 |         |
| Donor 2 INwt, replicate 1, 10K VP/cell | 19.06                | 0.00                     | 0.00       | 0.43               | 2.60                    | 16.03                     | 0.0%                 | 0.0%    |
|                                        | 17.37                | 0.00                     | 0.00       | 0.37               | 1.76                    | 15.24                     | 0.0%                 |         |
| Donor 2 INwt, replicate 2, 10K VP/cell | 18.79                | 0.00                     | 0.00       | 0.28               | 2.00                    | 16.50                     | 0.0%                 | 0.0%    |
|                                        | 17.70                | 0.00                     | 0.00       | 0.35               | 1.82                    | 15.53                     | 0.0%                 |         |
| Donor 2 D+H, replicate 1, 5K VP/cell   | 10.10                | 0.01                     | 0.01       | 0.29               | 3.19                    | 6.62                      | 0.4%                 | 0.3%    |
|                                        | 9.99                 | 0.01                     | 0.02       | 0.33               | 2.80                    | 6.86                      | 0.4%                 |         |
| Donor 2 D+H, replicate 2, 5K VP/cell   | 9.38                 | 0.00                     | 0.01       | 0.34               | 2.81                    | 6.23                      | 0.2%                 | 0.3%    |
|                                        | 10.52                | 0.01                     | 0.01       | 0.24               | 2.91                    | 7.37                      | 0.3%                 |         |
| Donor 2 D+H, replicate 1, 10K VP/cell  | 14.44                | 0.02                     | 0.01       | 0.38               | 5.05                    | 9.01                      | 0.3%                 | 0.3%    |
|                                        | 15.44                | 0.02                     | 0.01       | 0.50               | 4.04                    | 10.90                     | 0.3%                 |         |
| Donor 2 D+H, replicate 2, 10K VP/cell  | 26.00                | 0.02                     | 0.02       | 1.16               | 6.92                    | 17.92                     | 0.2%                 | 0.2%    |
|                                        | 21.97                | 0.02                     | 0.01       | 1.12               | 7.05                    | 13.81                     | 0.2%                 |         |

p. td: post transduction; vp: vector particle; NTD: non-transduced cells

**Table S9:** DdPCR results of targeted integration detection in primary T cells at day ten post transduction.

| Day 10 p.td.                           | Copy number per cell |                          |            |                    |                         |                           | Targeted             |         |
|----------------------------------------|----------------------|--------------------------|------------|--------------------|-------------------------|---------------------------|----------------------|---------|
|                                        | All vector genomes   | Targeted 28S integration |            | Production plasmid | Episomal vector genomes | Integrated vector genomes | Targeted integration |         |
| Sample                                 | NHEJ                 | 28Sint                   | Rev-28Sint | pLV                | 1-LTR                   | NHEJ-pLV-1-LTR            | % targeted           | Average |
| Donor 1 NTD-1                          | 0.01                 | 0.00                     | 0.00       | 0.00               | 0.00                    | 0.01                      | 0.0%                 | 0.0%    |
|                                        | 0.00                 | 0.00                     | 0.00       | 0.00               | 0.00                    | 0.00                      | 0.0%                 |         |
| Donor 1 NTD-2                          | 0.00                 | 0.00                     | 0.00       | 0.00               | 0.00                    | 0.00                      | 0.0%                 |         |
|                                        | 0.00                 | 0.00                     | 0.00       | 0.00               | 0.00                    | 0.00                      | 0.0%                 |         |
| Donor 1 INwt, replicate 1, 5K VP/cell  | 6.10                 | 0.00                     | 0.00       | 0.04               | 0.19                    | 5.87                      | 0.1%                 | 0.1%    |
|                                        | 6.51                 | 0.00                     | 0.00       | 0.02               | 0.26                    | 6.23                      | 0.1%                 |         |
| Donor 1 INwt, replicate 2, 5K VP/cell  | 6.75                 | 0.00                     | 0.00       | 0.02               | 0.24                    | 6.49                      | 0.1%                 |         |
|                                        | 6.51                 | 0.00                     | 0.00       | 0.04               | 0.26                    | 6.21                      | 0.1%                 |         |
| Donor 1 INwt, replicate 1, 10K VP/cell | 8.50                 | 0.00                     | 0.00       | 0.03               | 0.34                    | 8.13                      | 0.0%                 | 0.0%    |
|                                        | 8.71                 | 0.00                     | 0.00       | 0.03               | 0.31                    | 8.37                      | 0.1%                 |         |
| Donor 1 INwt, replicate 2, 10K VP/cell | 8.37                 | 0.00                     | 0.00       | 0.04               | 0.37                    | 7.95                      | 0.1%                 |         |
|                                        | 7.77                 | 0.00                     | 0.00       | 0.05               | 0.24                    | 7.49                      | 0.1%                 |         |
| Donor 1 D+H, replicate 1, 5K VP/cell   | 0.35                 | 0.00                     | 0.00       | 0.01               | 0.12                    | 0.22                      | 1.3%                 | 4.4%    |
|                                        | 0.33                 | 0.01                     | 0.01       | 0.01               | 0.09                    | 0.24                      | 4.7%                 |         |
| Donor 1 D+H, replicate 2, 5K VP/cell   | 0.29                 | 0.01                     | 0.01       | 0.01               | 0.10                    | 0.19                      | 7.8%                 |         |
|                                        | 0.27                 | 0.00                     | 0.01       | 0.00               | 0.08                    | 0.19                      | 3.6%                 |         |
| Donor 1 D+H, replicate 1, 10K VP/cell  | 0.47                 | 0.00                     | 0.01       | 0.01               | 0.15                    | 0.30                      | 4.3%                 | 4.8%    |
|                                        | 0.49                 | 0.01                     | 0.01       | 0.00               | 0.15                    | 0.33                      | 4.4%                 |         |
| Donor 1 D+H, replicate 2, 10K VP/cell  | 0.53                 | 0.01                     | 0.01       | 0.00               | 0.14                    | 0.39                      | 5.6%                 |         |
|                                        | 0.51                 | 0.01                     | 0.01       | 0.01               | 0.16                    | 0.35                      | 5.1%                 |         |
| Donor 2 NTD-1                          | 0.00                 | 0.00                     | 0.00       | 0.00               | 0.00                    | 0.00                      | 0.0%                 | 0.0%    |
|                                        | 0.00                 | 0.00                     | 0.00       | 0.00               | 0.00                    | 0.00                      | 0.0%                 |         |
| Donor 2 NTD-2                          | 0.00                 | 0.00                     | 0.00       | 0.00               | 0.00                    | 0.00                      | 0.0%                 |         |
|                                        | 0.00                 | 0.00                     | 0.00       | 0.00               | 0.00                    | 0.00                      | 0.0%                 |         |
| Donor 2 INwt, replicate 1, 5K VP/cell  | 2.60                 | 0.00                     | 0.00       | 0.00               | 0.12                    | 2.48                      | 0.1%                 | 0.1%    |
|                                        | 2.40                 | 0.00                     | 0.00       | 0.00               | 0.08                    | 2.32                      | 0.0%                 |         |
| Donor 2 INwt, replicate 2, 5K VP/cell  | 2.37                 | 0.00                     | 0.00       | 0.00               | 0.12                    | 2.25                      | 0.2%                 |         |
|                                        | 2.41                 | 0.00                     | 0.00       | 0.02               | 0.10                    | 2.29                      | 0.0%                 |         |
| Donor 2 INwt, replicate 1, 10K VP/cell | 3.21                 | 0.00                     | 0.00       | 0.03               | 0.14                    | 3.04                      | 0.0%                 | 0.1%    |
|                                        | 3.03                 | 0.00                     | 0.00       | 0.04               | 0.07                    | 2.91                      | 0.0%                 |         |
| Donor 2 INwt, replicate 2, 10K VP/cell | 3.26                 | 0.00                     | 0.00       | 0.01               | 0.12                    | 3.13                      | 0.1%                 |         |
|                                        | 3.64                 | 0.00                     | 0.01       | 0.06               | 0.09                    | 3.49                      | 0.2%                 |         |
| Donor 2 D+H, replicate 1, 5K VP/cell   | 0.14                 | 0.00                     | 0.00       | 0.00               | 0.03                    | 0.12                      | 5.0%                 | 2.7%    |
|                                        | 0.26                 | 0.00                     | 0.00       | 0.00               | 0.07                    | 0.19                      | 0.7%                 |         |
| Donor 2 D+H, replicate 2, 5K VP/cell   | 0.13                 | 0.00                     | 0.00       | 0.01               | 0.07                    | 0.05                      | 0.0%                 |         |
|                                        | 0.10                 | 0.00                     | 0.00       | 0.00               | 0.04                    | 0.06                      | 5.2%                 |         |
| Donor 2 D+H, replicate 1, 10K VP/cell  | 0.15                 | 0.00                     | 0.00       | 0.01               | 0.03                    | 0.12                      | 5.7%                 | 3.9%    |
|                                        | 0.11                 | 0.00                     | 0.00       | 0.00               | 0.01                    | 0.10                      | 0.0%                 |         |
| Donor 2 D+H, replicate 2, 10K VP/cell  | 0.34                 | 0.00                     | 0.01       | 0.02               | 0.12                    | 0.20                      | 3.7%                 |         |
|                                        | 0.29                 | 0.01                     | 0.00       | 0.01               | 0.14                    | 0.14                      | 6.0%                 |         |

p. td: post transduction; vp: vector particle; NTD: non-transduced cells

**Table S10:** Quantification of the DJ region and the 18S rRNA gene copies in the genomes of primary T cells at day two post transduction.

| Sample                                 | CN DJ | Average DJ | CN 18SrRNA | Average 18SrRNA |
|----------------------------------------|-------|------------|------------|-----------------|
| Donor 1 NTD-1                          | 17.31 | 17.63      | 594.53     | 501.93          |
|                                        | 17.13 |            | 369.54     |                 |
| Donor 1 NTD-2                          | 18.63 |            | 514.97     |                 |
|                                        | 17.46 |            | 528.68     |                 |
| Donor 1 INwt, replicate 1, 10K VP/cell | 18.51 | 17.85      | 676.39     | 682.76          |
|                                        | 17.40 |            | 754.53     |                 |
| Donor 1 INwt, replicate 2, 10K VP/cell | 18.14 |            | 456.37     |                 |
|                                        | 17.36 |            | 843.77     |                 |
| Donor 1 D+H, replicate 1, 10K VP/cell  | 18.98 | 16.54      | 535.81     | 701.19          |
|                                        | 14.71 |            | 490.89     |                 |
| Donor 1 D+H, replicate 2, 10K VP/cell  | 16.49 |            | 1 040.95   |                 |
|                                        | 16.00 |            | 737.11     |                 |
| Donor 2 NTD-1                          | 13.23 | 13.14      | 484.96     | 478.25          |
|                                        | 12.21 |            | 451.65     |                 |
| Donor 2 NTD-2                          | 15.05 |            | 614.73     |                 |
|                                        | 12.10 |            | 361.67     |                 |
| Donor 2 INwt, replicate 1, 10K VP/cell | 13.89 | 14.33      | 690.84     | 538.84          |
|                                        | 13.62 |            | 740.72     |                 |
| Donor 2 INwt, replicate 2, 10K VP/cell | 14.15 |            | 370.03     |                 |
|                                        | 15.66 |            | 353.77     |                 |
| Donor 2 D+H, replicate 1, 10K VP/cell  | 12.98 | 13.85      | 607.67     | 659.56          |
|                                        | 12.90 |            | 649.42     |                 |
| Donor 2 D+H, replicate 2, 10K VP/cell  | 14.48 |            | 862.98     |                 |
|                                        | 15.05 |            | 518.17     |                 |

CN: copy number; DJ: distal junction; vp: vector particle; NTD: non-transduced cells.



**Table S11:** RT-ddPCR measurements of provirus transcripts originating from the 28S rRNA gene locus in primary T cells at day two post transduction.

| Day 2 p. td.                           | Gene expression ratio to control assay |                     |                                                                              |                       | Gene expression ratio comparison                         |
|----------------------------------------|----------------------------------------|---------------------|------------------------------------------------------------------------------|-----------------------|----------------------------------------------------------|
|                                        | Total provirus expression              |                     | Provirus transcripts from the 28S rRNA locus (sense-orientation integration) |                       | 28S rRNA locus transcripts of total provirus transcripts |
| Sample                                 | Ratio (WPRE/IPO8)                      | Average (WPRE/IPO8) | Ratio (28Sint/IPO8)                                                          | Average (28Sint/IPO8) | 28Sint-ratio/ WPRE-ratio                                 |
| Donor 1 NTD-1                          | 0.00                                   | <b>0.00</b>         | 0.00                                                                         | <b>0.00</b>           | <b>0.0 %</b>                                             |
|                                        | 0.00                                   |                     | 0.00                                                                         |                       |                                                          |
| Donor 1 NTD-2                          | 0.00                                   | <b>0.00</b>         | 0.00                                                                         | <b>0.00</b>           | <b>0.0 %</b>                                             |
|                                        | 0.00                                   |                     | 0.00                                                                         |                       |                                                          |
| Donor 1 INwt, replicate 1, 5K VP/cell  | 19.51                                  | <b>25.36</b>        | 0.00                                                                         | <b>0.00</b>           | <b>0.0 %</b>                                             |
|                                        | <i>2 030.04</i>                        |                     | 0.00                                                                         |                       |                                                          |
| Donor 1 INwt, replicate 2, 5K VP/cell  | 28.66                                  | <b>25.36</b>        | 0.00                                                                         | <b>0.00</b>           | <b>0.0 %</b>                                             |
|                                        | 27.93                                  |                     | 0.00                                                                         |                       |                                                          |
| Donor 1 INwt, replicate 1, 10K VP/cell | <i>1 875.80</i>                        | <b>22.70</b>        | 0.00                                                                         | <b>0.00</b>           | <b>0.0 %</b>                                             |
|                                        | <i>1 893.12</i>                        |                     | 0.00                                                                         |                       |                                                          |
| Donor 1 INwt, replicate 2, 10K VP/cell | <i>2 116.56</i>                        | <b>22.70</b>        | 0.00                                                                         | <b>0.00</b>           | <b>0.0 %</b>                                             |
|                                        | 22.70                                  |                     | 0.00                                                                         |                       |                                                          |
| Donor 1 D+H, replicate 1, 5K VP/cell   | 1.81                                   | <b>2.64</b>         | 0.01                                                                         | <b>0.00</b>           | <b>0.1 %</b>                                             |
|                                        | 1.82                                   |                     | 0.00                                                                         |                       |                                                          |
| Donor 1 D+H, replicate 2, 5K VP/cell   | 3.15                                   | <b>2.64</b>         | 0.00                                                                         | <b>0.00</b>           | <b>0.1 %</b>                                             |
|                                        | 3.77                                   |                     | 0.00                                                                         |                       |                                                          |
| Donor 1 D+H, replicate 1, 10K VP/cell  | 3.19                                   | <b>3.04</b>         | 0.03                                                                         | <b>0.03</b>           | <b>0.8 %</b>                                             |
|                                        | 3.21                                   |                     | 0.03                                                                         |                       |                                                          |
| Donor 1 D+H, replicate 2, 10K VP/cell  | 2.79                                   | <b>3.04</b>         | 0.02                                                                         | <b>0.03</b>           | <b>0.8 %</b>                                             |
|                                        | 2.96                                   |                     | 0.02                                                                         |                       |                                                          |
| Donor 2 NTD-1                          | 0.01                                   | <b>0.00</b>         | 0.00                                                                         | <b>0.00</b>           | <b>0.0 %</b>                                             |
|                                        | 0.00                                   |                     | 0.00                                                                         |                       |                                                          |
| Donor 2 NTD-2                          | 0.00                                   | <b>0.00</b>         | 0.00                                                                         | <b>0.00</b>           | <b>0.0 %</b>                                             |
|                                        | 0.00                                   |                     | 0.00                                                                         |                       |                                                          |
| Donor 2 INwt, replicate 1, 5K VP/cell  | 14.07                                  | <b>12.71</b>        | 0.00                                                                         | <b>0.00</b>           | <b>0.0 %</b>                                             |
|                                        | 14.72                                  |                     | 0.00                                                                         |                       |                                                          |
| Donor 2 INwt, replicate 2, 5K VP/cell  | 11.03                                  | <b>12.71</b>        | 0.00                                                                         | <b>0.00</b>           | <b>0.0 %</b>                                             |
|                                        | 11.01                                  |                     | 0.00                                                                         |                       |                                                          |
| Donor 2 INwt, replicate 1, 10K VP/cell | 16.67                                  | <b>14.54</b>        | 0.00                                                                         | <b>0.00</b>           | <b>0.0 %</b>                                             |
|                                        | 14.44                                  |                     | 0.00                                                                         |                       |                                                          |
| Donor 2 INwt, replicate 2, 10K VP/cell | 11.21                                  | <b>14.54</b>        | 0.00                                                                         | <b>0.00</b>           | <b>0.0 %</b>                                             |
|                                        | 15.83                                  |                     | 0.00                                                                         |                       |                                                          |
| Donor 2 D+H, replicate 1, 5K VP/cell   | 1.45                                   | <b>1.25</b>         | 0.01                                                                         | <b>0.01</b>           | <b>0.4 %</b>                                             |
|                                        | 1.42                                   |                     | 0.01                                                                         |                       |                                                          |
| Donor 2 D+H, replicate 2, 5K VP/cell   | 1.02                                   | <b>1.25</b>         | 0.00                                                                         | <b>0.01</b>           | <b>0.4 %</b>                                             |
|                                        | 1.10                                   |                     | 0.00                                                                         |                       |                                                          |
| Donor 2 D+H, replicate 1, 10K VP/cell  | 1.47                                   | <b>2.39</b>         | 0.01                                                                         | <b>0.01</b>           | <b>0.3 %</b>                                             |
|                                        | 1.43                                   |                     | 0.01                                                                         |                       |                                                          |
| Donor 2 D+H, replicate 2, 10K VP/cell  | 3.35                                   | <b>2.39</b>         | 0.01                                                                         | <b>0.01</b>           | <b>0.3 %</b>                                             |
|                                        | 3.30                                   |                     | 0.01                                                                         |                       |                                                          |

p. td: post transduction; vp: vector particle; NTD: non-transduced cells  
*value too high to reliably quantitate; not included in average*

**Table S12:** RT-ddPCR measurements of provirus transcripts originating from the 28S rRNA gene locus in primary T cells at day ten post transduction.

| Day 10 p.td.                           | Gene expression ratio to control assay |                     |                                                                              |                       | Gene expression ratio comparison                         |
|----------------------------------------|----------------------------------------|---------------------|------------------------------------------------------------------------------|-----------------------|----------------------------------------------------------|
|                                        | Total provirus expression              |                     | Provirus transcripts from the 28S rRNA locus (sense-orientation integration) |                       | 28S rRNA locus transcripts of total provirus transcripts |
| Sample                                 | Ratio (WPRE/IPO8)                      | Average (WPRE/IPO8) | Ratio (28Sint/IPO8)                                                          | Average (28Sint/IPO8) | 28Sint-ratio/ WPRE-ratio                                 |
| Donor 1 NTD-1                          | 0.00                                   | <b>0.00</b>         | 0.00                                                                         | <b>0.000</b>          | <b>0.0 %</b>                                             |
|                                        | 0.00                                   |                     | 0.00                                                                         |                       |                                                          |
| Donor 1 NTD-2                          | 0.00                                   | <b>0.00</b>         | 0.00                                                                         | <b>0.000</b>          | <b>0.0 %</b>                                             |
|                                        | 0.00                                   |                     | 0.00                                                                         |                       |                                                          |
| Donor 1 INwt, replicate 1, 5K VP/cell  | 11.60                                  | <b>12.70</b>        | 0.00                                                                         | <b>0.000</b>          | <b>0.0 %</b>                                             |
|                                        | 11.01                                  |                     | 0.00                                                                         |                       |                                                          |
| Donor 1 INwt, replicate 2, 5K VP/cell  | 12.54                                  | <b>12.70</b>        | 0.00                                                                         | <b>0.000</b>          | <b>0.0 %</b>                                             |
|                                        | 13.97                                  |                     | 0.00                                                                         |                       |                                                          |
| Donor 1 INwt, replicate 1, 10K VP/cell | 31.27                                  | <b>23.67</b>        | 0.00                                                                         | <b>0.000</b>          | <b>0.0 %</b>                                             |
|                                        | 29.89                                  |                     | 0.00                                                                         |                       |                                                          |
| Donor 1 INwt, replicate 2, 10K VP/cell | 16.24                                  | <b>23.67</b>        | 0.00                                                                         | <b>0.000</b>          | <b>0.0 %</b>                                             |
|                                        | 17.31                                  |                     | 0.00                                                                         |                       |                                                          |
| Donor 1 D+H, replicate 1, 5K VP/cell   | 0.63                                   | <b>0.63</b>         | 0.01                                                                         | <b>0.013</b>          | <b>2.0 %</b>                                             |
|                                        | 0.61                                   |                     | 0.01                                                                         |                       |                                                          |
| Donor 1 D+H, replicate 2, 5K VP/cell   | 0.65                                   | <b>0.63</b>         | 0.01                                                                         | <b>0.013</b>          | <b>2.0 %</b>                                             |
|                                        | 0.64                                   |                     | 0.01                                                                         |                       |                                                          |
| Donor 1 D+H, replicate 1, 10K VP/cell  | 1.67                                   | <b>1.41</b>         | 0.00                                                                         | <b>0.007</b>          | <b>0.5 %</b>                                             |
|                                        | 1.65                                   |                     | 0.00                                                                         |                       |                                                          |
| Donor 1 D+H, replicate 2, 10K VP/cell  | 1.19                                   | <b>1.41</b>         | 0.01                                                                         | <b>0.007</b>          | <b>0.5 %</b>                                             |
|                                        | 1.14                                   |                     | 0.01                                                                         |                       |                                                          |
| Donor 2 NTD-1                          | 0.01                                   | <b>0.00</b>         | 0.00                                                                         | <b>0.000</b>          | <b>0.0 %</b>                                             |
|                                        | 0.00                                   |                     | 0.00                                                                         |                       |                                                          |
| Donor 2 NTD-2                          | 0.00                                   | <b>0.00</b>         | 0.00                                                                         | <b>0.000</b>          | <b>0.0 %</b>                                             |
|                                        | 0.00                                   |                     | 0.00                                                                         |                       |                                                          |
| Donor 2 INwt, replicate 1, 5K VP/cell  | 4.58                                   | <b>6.88</b>         | 0.00                                                                         | <b>0.000</b>          | <b>0.0 %</b>                                             |
|                                        | 4.61                                   |                     | 0.00                                                                         |                       |                                                          |
| Donor 2 INwt, replicate 2, 5K VP/cell  | 8.84                                   | <b>6.88</b>         | 0.00                                                                         | <b>0.000</b>          | <b>0.0 %</b>                                             |
|                                        | 9.46                                   |                     | 0.00                                                                         |                       |                                                          |
| Donor 2 INwt, replicate 1, 10K VP/cell | 9.25                                   | <b>7.58</b>         | 0.00                                                                         | <b>0.000</b>          | <b>0.0 %</b>                                             |
|                                        | 9.01                                   |                     | 0.00                                                                         |                       |                                                          |
| Donor 2 INwt, replicate 2, 10K VP/cell | 6.16                                   | <b>7.58</b>         | 0.00                                                                         | <b>0.000</b>          | <b>0.0 %</b>                                             |
|                                        | 5.91                                   |                     | 0.00                                                                         |                       |                                                          |
| Donor 2 D+H, replicate 1, 5K VP/cell   | 0.65                                   | <b>0.72</b>         | 0.00                                                                         | <b>0.001</b>          | <b>0.2 %</b>                                             |
|                                        | 0.59                                   |                     | 0.00                                                                         |                       |                                                          |
| Donor 2 D+H, replicate 2, 5K VP/cell   | 0.75                                   | <b>0.72</b>         | 0.00                                                                         | <b>0.001</b>          | <b>0.2 %</b>                                             |
|                                        | 0.90                                   |                     | 0.00                                                                         |                       |                                                          |
| Donor 2 D+H, replicate 1, 10K VP/cell  | 0.00                                   | <b>3.83</b>         | 0.04                                                                         | <b>0.009</b>          | <b>0.2 %</b>                                             |
|                                        | 0.18                                   |                     | 0.00                                                                         |                       |                                                          |
| Donor 2 D+H, replicate 2, 10K VP/cell  | 7.41                                   | <b>3.83</b>         | 0.00                                                                         | <b>0.009</b>          | <b>0.2 %</b>                                             |
|                                        | 7.74                                   |                     | 0.00                                                                         |                       |                                                          |

p. td: post transduction; vp: vector particle; NTD: non-transduced cells

**File S1:** CIS analysis of all LVs.

**File S2:** Enriched GO terms in the CIS-associated genes of the analyzed LVs.

## Supplemental Methods

Primer and linker sequences used for the extraction of LV integration sites.

| Primer Name                        | Primer Sequence (5'-3')                                                                     |
|------------------------------------|---------------------------------------------------------------------------------------------|
| ForwA + MID13 HIV LTR primer, PCR2 | CCATCTCATCCCTGCGTGTCTCCGACTCAGCATAGTAGTGAGACCCTTTTAGTCAGTGTGGAAAATC                         |
| ForwA + MID14 HIV LTR primer, PCR2 | CCATCTCATCCCTGCGTGTCTCCGACTCAGCGAGAGATACAGACCCTTTTAGTCAGTGTGGAAAATC                         |
| ForwA + MID15 HIV LTR primer, PCR2 | CCATCTCATCCCTGCGTGTCTCCGACTCAGATACGACGTAAGACCCTTTTAGTCAGTGTGGAAAATC                         |
| ForwA + MID16 HIV LTR primer, PCR2 | CCATCTCATCCCTGCGTGTCTCCGACTCAGTCACGTAAGACCCTTTTAGTCAGTGTGGAAAATC                            |
| ForwA + MID17 HIV LTR primer, PCR2 | CCATCTCATCCCTGCGTGTCTCCGACTCAGCGTCTAGTACAGACCCTTTTAGTCAGTGTGGAAAATC                         |
| ForwA + MID18 HIV LTR primer, PCR2 | CCATCTCATCCCTGCGTGTCTCCGACTCAGTCTACGTAGCAGACCCTTTTAGTCAGTGTGGAAAATC                         |
| Rev_P1b+ad4_PCR2                   | CACTACGCCTCCGCTTTCTCTCTATGGGCAGTCGGTGACATTGCTTCTCCACTAGAG                                   |
| Rev_P1b+ad6_PCR2                   | CACTACGCCTCCGCTTTCTCTCTATGGGCAGTCGGTGAACCTTGCACTTCTGACCTAGCT                                |
| Rev_P1b+ad7_PCR2                   | CACTACGCCTCCGCTTTCTCTCTATGGGCAGTCGGTGAGACGAGTCAGTCTACTAAAG                                  |
| Rev_P1b+ad8_PCR2                   | CACTACGCCTCCGCTTTCTCTCTATGGGCAGTCGGTGAACGCGAGCCAGACTCCATATT                                 |
| Rev_P1b+ad9_PCR2                   | CACTACGCCTCCGCTTTCTCTCTATGGGCAGTCGGTGATCGCTAGAGTACGGCCTTGAA                                 |
| Rev_P1b+ad10_PCR2                  | CACTACGCCTCCGCTTTCTCTCTATGGGCAGTCGGTGATATTGAGAGAGGGAAAGAGGC                                 |
| L4 PCR1 primer                     | TTCAGGAGGTCACCTTCGCACAT                                                                     |
| L6 PCR1 primer                     | TAGACCGCTCAGAGGTCATACT                                                                      |
| L7 PCR1 primer                     | CATCGTCGACACACGTGATGAC                                                                      |
| L8 PCR1 primer                     | TATGCGGGACAGGTAATACGCG                                                                      |
| L9 PCR1 primer                     | GGAATCTATGTAGCAGGTCGCT                                                                      |
| L10 PCR1 primer                    | CGCTTTGAGCTATGAACCTAT                                                                       |
| MuL4 anneal                        | TTCAGGAGGTCACCTTCGCACATTGCTTCTTCCACTAGAGTGTTCGCAATTTATCGTGAAACGCTTTCGCGTTTTTCGTGCGCCGCTTCA  |
| MuL6 anneal                        | TAGACCGCTCAGAGGTCATACTTGCACTTCTGACCTAGCTTGTTCGCAATTTATCGTGAAACGCTTTCGCGTTTTTCGTGCGCCGCTTCA  |
| MuL7 anneal                        | CATCGTCGACACACGTGATGACGAGTCAGTCTACTAAAGTGTTCGCAATTTATCGTGAAACGCTTTCGCGTTTTTCGTGCGCCGCTTCA   |
| MuL8 anneal                        | TATGCGGGACAGGTAATACGCGAGCCAGACTCCATATTTGTTTTCGCAATTTATCGTGAAACGCTTTCGCGTTTTTCGTGCGCCGCTTCA  |
| MuL9 anneal                        | GGAATCTATGTAGCAGGTCGCTAGAGTACGGCCTTGAATGTTTTCGCAATTTATCGTGAAACGCTTTCGCGTTTTTCGTGCGCCGCTTCA  |
| MuL10 anneal                       | CGCTTTGAGCTATGAACCTATTGAGAGAGGGAAAGAGGCTGTTTTCGCAATTTATCGTGAAACGCTTTCGCGTTTTTCGTGCGCCGCTTCA |
| Mu -- Donor                        | TCGGATGAAGCGGCGCACGAAAAACGGAAGCGTTTTACGATAAATGCGAAAACA/3AmMC7/                              |
| HIVLTR primer,PCR1                 | CTTAAGCCTCAATAAAGCTTGCCTTGAG                                                                |

Details of the materials used in ddPCR.

| Product                                             | Bio-Rad Cat. No. | Manufacturing origin |
|-----------------------------------------------------|------------------|----------------------|
| Droplet generation oil for probes                   | 1863005          | USA                  |
| Droplet reader oil                                  | 1863004          | USA                  |
| DG8™ Cartridges for QX200™/QX100™ Droplet Generator | 1864008          | Germany              |
| DG8™ Gaskets for QX200™/QX100™ Droplet Generator    | 1863009          | USA                  |
| ddPCR™ 96-Well Plates                               | 12001925         | USA                  |
| Piercable foil heat seal                            | 1814040          | UK                   |
| Supermix for probes (no dUTP)                       | 1863025          | USA                  |

Primers and design of the ddPCR and RT-ddPCR assays used to estimate integration targeting near the I-PpoI site and transcription from the 28S rRNA gene locus.

| Primer Name    | Primer Sequence (5'-3')     | Assay          | Used in assay to detect                                                                                                                                                      |
|----------------|-----------------------------|----------------|------------------------------------------------------------------------------------------------------------------------------------------------------------------------------|
| 28Sint_FW      | GCTCTCTGGCTAACTAGGGAA       | 28S int. Forw. | Transgene integration in the I-PpoI recognition site in the 28S rRNA gene (sense orientation); detection of transgene transcripts from the 28S rRNA gene locus with RT-ddPCR |
| 28Sint_REV     | GTTTCATCCATTCATGCGCG        |                |                                                                                                                                                                              |
| 28Sint_int     | TGTGCCCGTCTGTTGTGTGACTCTGGT |                |                                                                                                                                                                              |
| Rev-28Sint_FW  | AGCAGTGGGTTCCCTAGTTA        | 28S int.Rev.   | Transgene integration in the I-PpoI recognition site in the 28S rRNA gene (antisense orientation)                                                                            |
| Rev-28Sint_REV | GTTTCATCCATTCATGCGCG        |                |                                                                                                                                                                              |
| Rev-28Sint_int | CCAGAGAGCTCCAGGCTCAGATCTGG  |                |                                                                                                                                                                              |
| 1-LTR FW       | GCTCGGTACCTTTAAGACCA        | 1-LTR          | Episomal vector genomes                                                                                                                                                      |
| 1-LTR REV      | GTTTCCTTTTCGCTTTCAGG        |                |                                                                                                                                                                              |
| 1-LTR int      | AGTCAGTGTGGAAAATCTCTAGCAGTG |                |                                                                                                                                                                              |
| NHEJ_fw        | GGAAAATCTCTAGCAGTGGC        | NHEJ           | All vector genomes (MRC-5 and T cell integration targeting efficiency measurements)                                                                                          |
| NHEJ_rev       | CCCGCTTAATACTGACGCT         |                |                                                                                                                                                                              |
| NHEJ_int       | GCAAGAGGCGAGGGGCGGCG        |                |                                                                                                                                                                              |
| pLV-fw         | GCCTTGAGTGCTTCAAGTAG        | pLV            | Production plasmid carry-over (transgene construct)                                                                                                                          |
| pLV-rev        | CAAGTTCCTCTACTCTCTG         |                |                                                                                                                                                                              |
| pLV-int        | TGTGCCCGTCTGTTGTGTGACTCTGGT |                |                                                                                                                                                                              |
| WPRE_FW        | CACTGACAATTCCGTGGTGT        | WPRE           | All vector genomes (hTERT-RPE1 integration targeting efficiency measurements; RT-ddPCR)                                                                                      |
| WPRE_REV       | CAGAATCCAGGTGGCAACA         |                |                                                                                                                                                                              |
| WPRE_int       | ACGTCCTTTCCATGGCTGCTCGCCT   |                |                                                                                                                                                                              |
| DJgRNA3_FW     | CATTTCCCAGCTTCCAGGAT        | DJ             | Quantification of possible deletions of the distal junction (DJ) sequences                                                                                                   |
| DJgRNA3_REV    | AGGAGCTTGGGATCTGTCTC        |                |                                                                                                                                                                              |
| DJgRNA3_int    | TCGCAGGGCAACAGGGGCTGTGA     |                |                                                                                                                                                                              |
| 18SrRNA_FW     | CGCTACTACCGATTGGATGG        | 18S            | Quantification of possible deletions of the 18S rRNA gene copies                                                                                                             |
| 18SrRNA_REV    | CAAGTTCGACCGTCTTCTCA        |                |                                                                                                                                                                              |
| 18SrRNA_int    | AGGCCCTCGGATCGGCCCG         |                |                                                                                                                                                                              |

Reference gene assays: PrimePCR ddPCR Copy Number Assay:RPP30, Human (Bio-Rad Assay ID dHsaCP2500350)

PrimePCR ddPCR Expression Probe Assay:IPO8, Human (Bio-Rad Assay ID dHsaCPE5044719)

All assays from Bio-Rad (made in US); Dyes: 5' 6-FAM/HEX, quencher 3' Iowa Black FQ

PCR program used in ddPCR assays.

| Program: |       |      |
|----------|-------|------|
| 95 °C    | 10:00 | 50 x |
| 94 °C    | 1:00  |      |
| 61 °C    | 2:00  |      |
| 98 °C    | 10:00 |      |
| 4 °C     | hold  |      |
