# Supplementary material
Source: PubMed Central journal article supplement (PMC7403359)
Supplement: mmc5.pdf [file mmc5.pdf]

# Efficient Nuclease-Directed Integration of Lentivirus Vectors into the Human Ribosomal DNA Locus

Diana Schenkwein,<sup>1,5</sup> Saira Afzal,<sup>2,5</sup> Alisa Nousiainen,<sup>1</sup> Manfred Schmidt,<sup>2,3</sup> and Seppo Ylä-Herttuala<sup>1,4</sup>

<sup>1</sup>A.I. Virtanen Institute for Molecular Sciences, University of Eastern Finland, P.O. Box 1627, FIN-70211 Kuopio, Finland; <sup>2</sup>Department of Translational Oncology, National Center for Tumor Diseases (NCT) and German Cancer Research Center (DKFZ), Im Neuenheimer Feld 581, 69120 Heidelberg, Germany; <sup>3</sup>GeneWerk GmbH, Im Neuenheimer Feld 582, 69120 Heidelberg, Germany; <sup>4</sup>Heart Center and Gene Therapy Unit, Kuopio University Hospital, P.O. Box 1777, FIN-70211 Kuopio, Finland

**Lentivirus vectors (LVs) are efficient tools for gene transfer, but the non-specific nature of transgene integration by the viral integration machinery carries an inherent risk for genotoxicity. We modified the integration machinery of LVs and harnessed the cellular DNA double-strand break repair machinery to integrate transgenes into ribosomal DNA, a promising genomic safe-harbor site for transgenes. LVs carrying modified I-PpoI-derived homing endonuclease proteins were characterized in detail, and we found that at least 21% of all integration sites localized to ribosomal DNA when LV transduction was coupled to target DNA cleavage. In addition to the primary sequence recognized by the endonuclease, integration was also enriched in chromatin domains topologically associated with nucleoli, which contain the targeted ribosome RNA genes. Targeting of this highly repetitive region for integration was not associated with detectable DNA deletions or negative impacts on cell health in transduced primary human T cells. The modified LVs characterized here have an overall lower risk for insertional mutagenesis than regular LVs and can thus improve the safety of gene and cellular therapy.**

## INTRODUCTION

Human immunodeficiency virus (HIV) 1-based lentivirus vectors (LVs) are increasingly used in different gene therapy trials ranging from the treatment of monogenic diseases to cell therapy of cancer.<sup>1,2</sup> Despite being less genotoxic than the more frequently used gammaretrovirus vectors,<sup>3</sup> LVs—like all integrating gene transfer systems—possess a risk of causing undesired genomic events that can lead to new malignancies. The genotoxicity risks of LVs are mainly related to aberrant transcriptional activation or inactivation of cellular genes and the induction of new splice variants with potentially oncogenic effects.<sup>4</sup>

The HIV-1 integrase protein (IN) catalyzes permanent incorporation of vector-carried transgenes into the chromatin of host cells.<sup>5</sup> It processes the viral long terminal repeats (LTRs), which flank the viral genome, so that two nucleotides from the LTR's 3' ends are cleaved off (the 3' guanine-thymine, or GT, dinucleotide). Cellular DNA repair enzymes finish the integration reaction by sealing remaining gaps between the provirus and genomic DNA. Mainly through IN's

interaction with its cellular co-factor PSIP1 (also called lens epithelium-derived growth factor LEDGF/p75) lentiviruses have a strong preference to integrate within coding sequences of actively transcribed protein-encoding genes.<sup>6,7</sup> Although no severe adverse effects have been described to date that would result from the typical integration pattern of LVs,<sup>2</sup> permanent transgene delivery into target cells would optimally take place in a predefined genomic region that could house transgenes with minimal risks for genotoxicity.

Ribosomal DNA (rDNA) consists of highly repetitive ribosomal RNA (rRNA) genes, of which there are about 400–600 copies in each cell.<sup>8</sup> rRNA genes are typically organized as tandem repeats that are separated by intergenic spacer (IGS) regions (Figure 1A). Apart from the 5S rRNA that is encoded from a cluster in chromosome 1, the genes encoding for the RNA components of ribosomes reside in the short arms of the acrocentric human chromosomes 13, 14, 15, 21, and 22 that form the nucleoli.<sup>9</sup> Due to the wealth of rRNA genes and the isolated location of nucleolar DNA distant from protein-encoding genes with oncogenic potential, rDNA represents a promising genomic safe harbor for the integration of therapeutic transgenes.

DNA double strand breaks (DSBs) are repaired in cells mainly through two pathways, the non-homologous end joining (NHEJ) and homologous recombination (HR).<sup>10</sup> Small insertions or deletions (indel mutations) frequently accompany NHEJ-driven DSB repair, but both pathways have been used successfully for genome editing and to integrate donor DNA molecules into specific sites with the aid of different nucleases.<sup>11,12</sup> Most currently available nuclease-based techniques, however, rely on transfection and require using at least two separate vectors or molecules, which can reduce the efficiency of desired modifications and hampers their *in vivo* use.

Received 21 November 2019; accepted 19 May 2020;  
<https://doi.org/10.1016/j.ymthe.2020.05.019>.

<sup>5</sup>These authors contributed equally to this work.

**Correspondence:** Seppo Ylä-Herttuala, MD, PhD, FESC, A.I. Virtanen Institute for Molecular Sciences, University of Eastern Finland, P.O. Box 1627, FI-70211 Kuopio, Finland.

**E-mail:** [seppo.ylaherttuala@uef.fi](mailto:seppo.ylaherttuala@uef.fi)

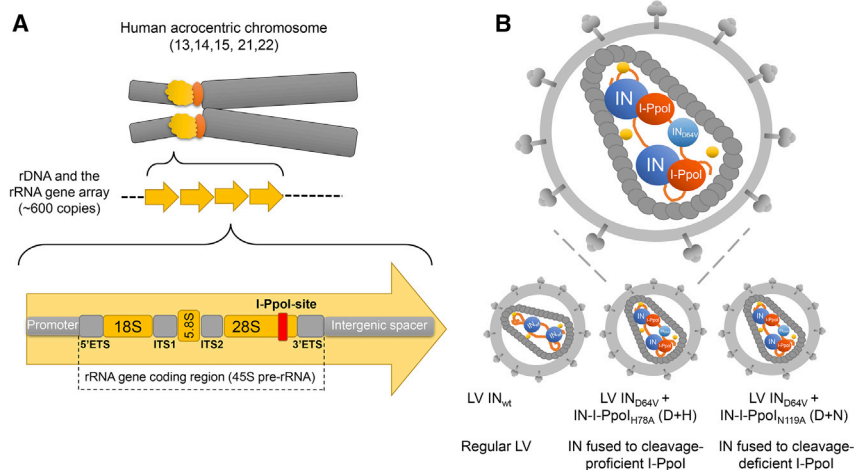

**Figure 1. rDNA and the LVs Generated in This Study to Direct Integration into the I-PpoI Site**

(A) An illustration of an acrocentric chromosome (top), the repeating rDNA units (yellow arrows) that contain the rRNA genes and the IGS (middle), and one rRNA gene with its flanking sequences (bottom). Each rRNA gene unit encodes a 45S pre-rRNA that serves as the precursor for the 18S, 5.8S, and 28S rRNAs of mature ribosomes. The I-PpoI site within the 28S rRNA gene is highlighted with a red box. In the current genome version hg38, there are three I-PpoI sites on chromosome 21 that are annotated with a 28S rRNA gene (Table S1). (B) Illustration of the different IN molecule-containing LVs studied in this work, with an enlargement of one IN-fusion protein-containing LV particle. rDNA, ribosomal DNA; rRNA, ribosomal RNA; ETS, external transcribed spacer; LV, lentivirus vector; IN, integrase; IN<sub>D64V</sub>, integration deficient IN.

We have characterized the full integration site repertoire of LVs that carry an enzymatically weakened homing endonuclease protein that was incorporated into the vectors with the aim of targeting integration to the DSBs it generates. I-PpoI recognizes a 15 bp sequence present in the 28S rRNA genes (RNA28S) of eukaryotes (Figure 1A).<sup>13,14</sup> The coupling of LV-transduction with target DNA cleavage enabled an unprecedentedly high level of transgene integration targeting into rDNA and decreased the genotoxicity risks associated with the use of LVs for gene transfer. These vectors retain the large packaging capacity of LVs and are directly suitable for both *ex vivo* and *in vivo* gene transfer applications.

## RESULTS

### Third-Generation LVs Used for Targeted Integration into rDNA

In order to generate targeted DSBs into rDNA, we used an IN-I-PpoI<sub>H78A</sub> fusion protein that binds to and cleaves the 28S rRNA gene but affects cellular viability less than the wild-type endonuclease.<sup>15</sup> Third-generation LVs containing the IN-I-PpoI<sub>H78A</sub> were produced with our previously established method that results in the incorporation of both the IN-fusion protein and the integration-deficient IN (IN<sub>D64V</sub>) molecules into vector particles (Figure 1B), which improves their titers and functionality.<sup>16</sup> LVs carrying the IN-I-PpoI<sub>H78A</sub> protein (hereafter called D+H) were characterized side-by-side with LVs carrying the enzymatically inactivated IN-I-PpoI<sub>N119A</sub> (D+N)<sup>16,17</sup> to better delineate the effects of target DNA cleavage on vector integration. Unmodified LVs (INwt) were used as a control. All vectors whose complete integrome was analyzed contained an EGFP transgene construct compatible with both LV-catalyzed and NHEJ-driven integration. The proportion of MRC-5 lung fibroblast cells positive for EGFP expression was 83%–97% at day 2 or 3 post-transduction when genomic DNA was extracted for IS analysis (Table S2).

### IN-I-PpoI<sub>H78A/N119A</sub> Inclusion Changes the Global Integration Pattern and Genotoxicity Risks of LVs

IS were analyzed separately for the non-repetitive and repetitive portions of the human genome (Hg38). The total numbers of IS

retrieved for the different vector types were 20,789 for LV-INwt, 7,181 for LV-D+H, and 2,906 for LV-D+N. The proportions of IS that had multiple hits in the genome (MH-IS) of the total data was found to be significantly higher in the IN-modified LVs in comparison to the control LV (Figure 2A). The exactly mappable or unique hit (UH)-IS were used to determine the overall integration pattern for each vector. The chromosomal distribution of IS was similar between the vectors apart from deviations in seven chromosomes (Figure 2B). The distribution of IS within genes was more uniform throughout the coding region for the IN-fusion protein containing LVs than for the INwt LVs, which typically integrate less frequently in the first 10th percentile of a gene's length (Figure 2C).<sup>18</sup> All analyzed LVs favored integration within genes over integration in their upstream regions, but in comparison to INwt LVs, there was a small but statistically significant increase in integration within the first 5 kb upstream of genes with the IN-modified LVs. The IN-fusion protein-containing LVs had fewer intragenic IS than INwt LVs (Figure 2D) and hence a smaller risk to interrupt cellular genes with important functions. A vector's tendency to integrate into or close to oncogenes is an important parameter of its safety, and HIV is known to integrate into these areas more than would be expected through chance.<sup>19</sup> Both IN-fusion protein-containing LVs had fewer IS within and near oncogenes in comparison to INwt-LVs (Figure 2E; Table S3). The IN-fusion protein LVs mainly integrated without IN activity in contrast to INwt LVs, whose LTRs were most frequently processed (Figure S1).

### rRNA and tRNA Repeats Are the Most Favored Targets for the IN-Modified LVs within the Repetitive Genome

The MH-IS were used to characterize the vectors' preferences to integrate within different genomic repeat elements, which were identified using RepeatMasker.<sup>20</sup> I-PpoI has 12 perfect recognition sites in the current genome version (Hg38), and all but two of these localize to rRNA repeat-contained sequences placed either on the acrocentric chromosome 21 or in non-acrocentric chromosomes that contain fragments of rRNA genes (Table S1). For D+H LVs, 41.9% of the

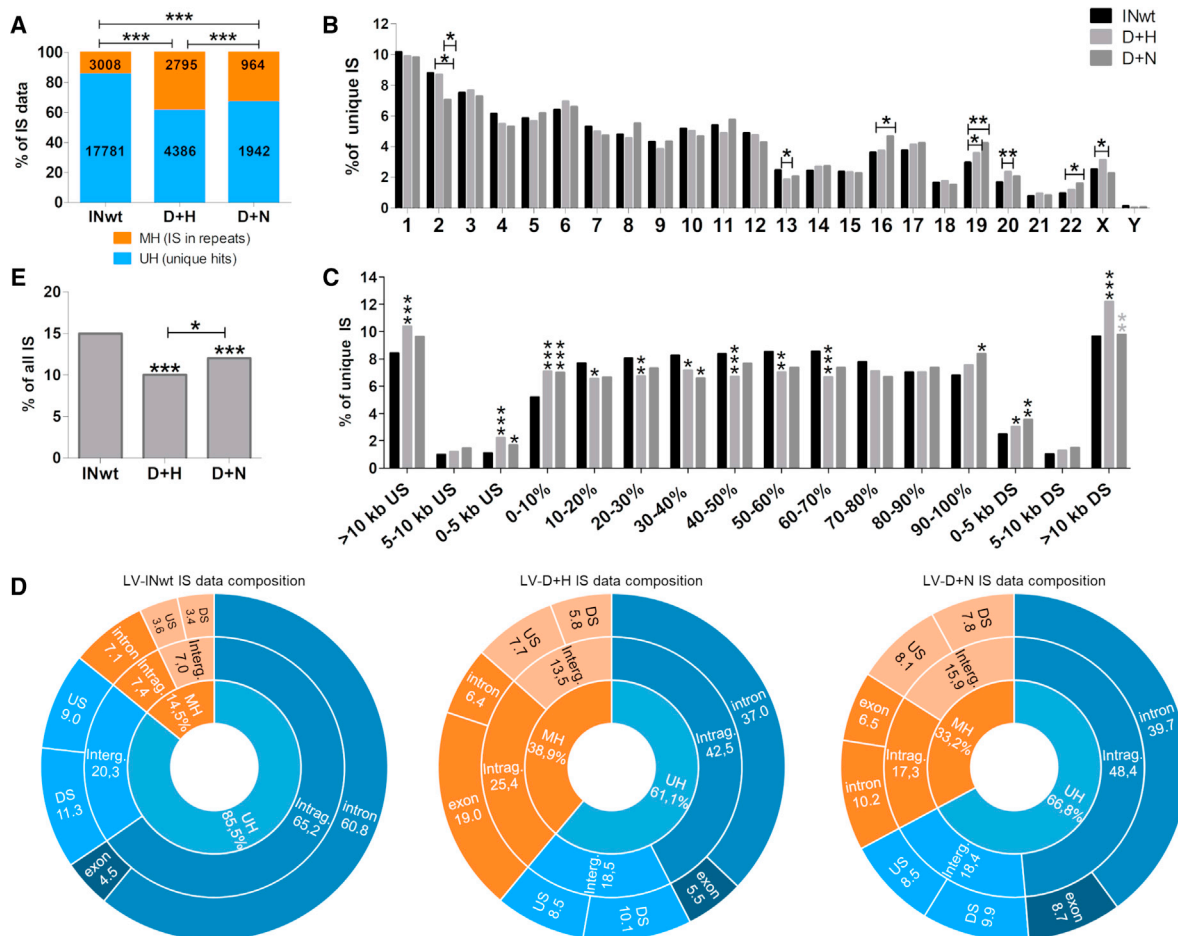

**Figure 2. Effects of IN-I-PpoI<sub>H78A/N119A</sub> Fusion Protein Inclusion on the Integration Characteristics of LVs**

(A) Composition of the integration site data and numbers of unique IS (UH) and multiple-hit IS (MH) retrieved for the different vectors. (B) Chromosomal distribution of integration sites. Chromosome numbers are shown on the x axis. (C) Distribution of integration sites with respect to upstream (US) regions of genes, the gene length (% of within gene) and downstream (DS) of genes. (D) A more detailed illustration of IS distribution within the uniquely mapping (UH; blue) and repetitive (MH; orange) portions of the genome. (E) Integration frequency within oncogenes. A list comprising 2,579 human cancer genes (<http://www.bushmanlab.org/links/genelists>) was used for the comparison. The statistical differences between the IN-modified LVs and the control LV are shown above the bars ( $p < 0.0001$  for both). Statistical differences between LVs were calculated using two-sided Fisher's exact test (D+H LVs versus D+N LVs) or with two-sided chi-square test (INwt LV compared to D+H or D+N LVs). \*\*\* $p < 0.001$ ; \*\* $p < 0.01$ ; \* $p < 0.05$ . In (C), the black asterisks denote differences between the control vector INwt LV and the IN-modified LVs, and gray asterisks denote differences between the D+H and D+N LVs. Intrag., intragenic IS; Interg., intergenic IS; INwt, wild-type integrase; D+H, IN<sub>D64V</sub> and IN-I-PpoI<sub>H78A</sub>-containing LVs; D+N, IN<sub>D64V</sub> and IN-I-PpoI<sub>N119A</sub>-containing LVs.

vector's MH reads were within rRNA repeats (Figure 3A). In contrast, D+N LV reads were most frequently associated with transfer RNA (tRNA) genes (17.8%), SINE/Alu repeats, and third most with rRNA repeats. tRNA genes were among the top three repeats also for the D+H LVs. INwt LVs preferred SINE/Alu (40.0%) and LINE/L1 repeats (15.5%) and had very few integrations in either rRNA or tRNA genes. Interestingly, also signal recognition particle RNA (srpRNA) and other repetitive non-coding RNA (ncRNA) genes were more frequently targeted for integration by the IN-modified LVs than by the control vector (Figure 3A; Figure S2). Based on the differences between the D+H and D+N LVs, it is evident that the introduction of DSBs increases vector integration into rRNA repeats.

### 28S rRNA Gene Cleavage Enables Highly Efficient Integration Targeting to rDNA

In addition to nucleolus-associated rDNA, rRNA gene segments are also found in the non-nucleolar genome,<sup>21</sup> and a fraction of the uniquely mapping IS reads localized to these sites. The compiled IS data comprising both the unique and multiple hit IS reads was therefore analyzed to determine the absolute numbers of rDNA-localized integrations. For the D+H LVs, 21.3% of all IS localized to sequences contained within an rDNA unit (Figure 3B), and the most favored locus within the rRNA gene was the 28S rRNA (Figure 3C). rDNA-localized IS comprised 2.6% and 0.08% of all IS for the vectors D+N and INwt, respectively (Figure 3B), which is well in line with

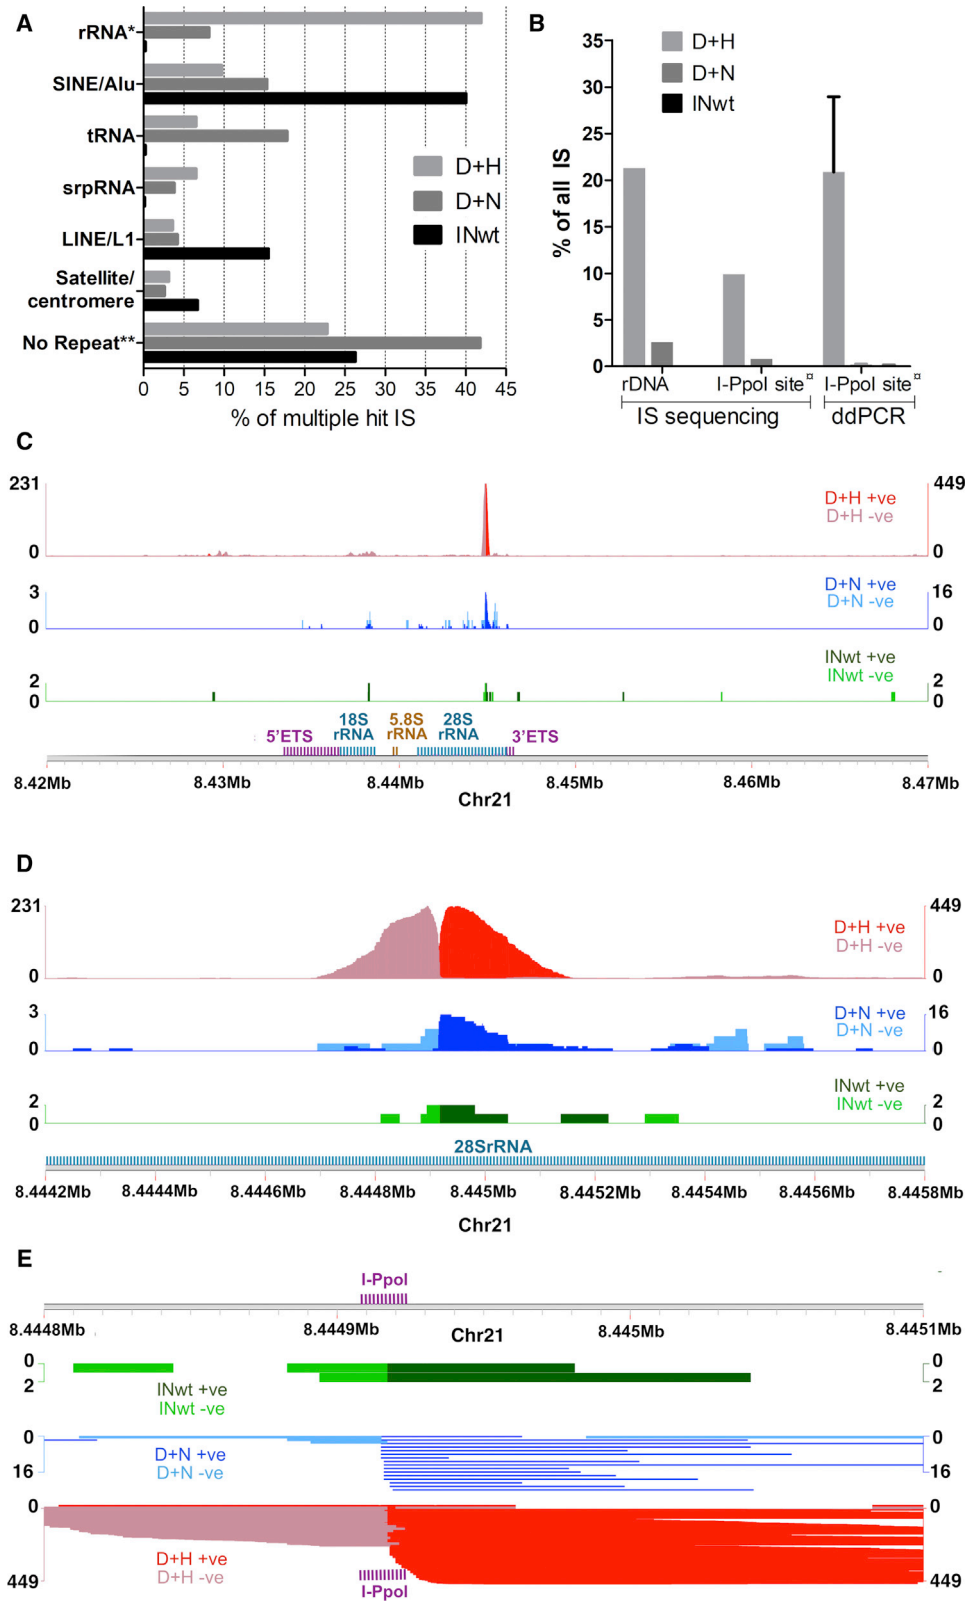

(legend on next page)



our previous characterizations of these vectors.<sup>16</sup> Similar to D+H LVs, the majority of D+N LV proviruses clustered into 28S rRNA but with a much lower frequency (Figure 3C).

To verify the differences between the vectors in catalyzing targeted integration, we used a droplet digital PCR (ddPCR)-based method that detects integrated vector genomes within a 235-bp window around the I-PpoI site in the 28S rRNA gene (Figure S3). At day 9 post-transduction, 20.9% of the D+H LV proviruses were estimated to reside in this locus in transduced MRC-5 cells (Figure 3B; see also Table S4). The proportion of IS reads within the same window was 9.9%. In comparison, for the LVs containing D+N and INwt the proportion of IS reads was 0.8% and 0.02%, respectively, and the ddPCR-based targeting estimates 0.2% and 0.1% (Figure 3B). Integration of the IN-modified LVs occurred more frequently in sense orientation both near the I-PpoI site (66% for D+H and 71% for D+N; Figure 3D) and within it (Figure 3E). Typical for DSB repair through NHEJ, integration into the I-PpoI site involved small indel mutations, which were observed more frequently in the D+H LV-treated than in the D+N LV-transduced cells (Figure S4).

The ddPCR result suggested that for LV D+H, the actual level of integration targeting into the immediate vicinity of the I-PpoI site in the rRNA gene is at least two times higher than that resolved with the IS sequencing method. Next, we used vectors containing a selectable marker for zeocin resistance to test whether the 28S rRNA insertions remained stable through conditions that require expression of the transgene. The proportion of proviruses in and near the I-PpoI site remained similar between selected and unselected hTERT-RPE1 cells, as verified with ddPCR (Table S5). Taken together, when LV transduction is coupled with the cleavage of target DNA by a vector-carried endonuclease, stable and highly efficient targeted integration of transgenes into rDNA is achieved.

### Integrase-I-PpoI Fusion Proteins Target Integration into Strong Hotspots That Are Distinct from the Areas Naturally Preferred by HIV-Derived LVs

Specific genomic loci have been identified that recur as preferential integration loci, or integration hotspots, for HIV-1 and LVs.<sup>22,23</sup> Such common integration sites (CISs) were identified to see if the inclusion of the IN-I-PpoI-fusion proteins altered the natural preferences of LVs. Significant CISs containing at least three ISs were characterized for their genomic coordinates and for the features they contained. In comparison to the IN-modified LVs, a larger proportion of INwt LVs' unique ISS

were engaged with integration hotspots, but proportionally fewer ISS formed the strongest CIS (Figure S5; Data S1). The majority of the 15 strongest CISs ( $n = 18$  individual CISs) of the LV INwt were localized within protein-encoding genes (77.8%) (Table 1), with many of the hotspots residing in regions previously characterized as preferred integration sites for LVs and HIV-1 (Tables S6 and S7).<sup>22–26</sup> The median CIS positions (CIS foci) of the seven strongest hotspots of the D+H LVs ( $n = 26$ ) were frequently found in intergenic loci (35%), and in many cases the RefSeq gene within the hotspot or nearest to it was a ncRNA gene (31%) (Table 1; Figure S6A). All together, six D+H LV CIS foci were within an rRNA repeat and five of them localized to I-PpoI cleavage sites on separate non-acrocentric chromosomes (Table 1; Data S1), verifying correct I-PpoI activity and NHEJ-driven insertion at the generated DSBs. The five strongest CIS foci ( $n = 21$  individual CISs) of the D+N LVs revealed a similar preference toward intergenic areas and ncRNA gene proximity as was seen for D+H LVs, but instead of rRNA gene repeats, the hotspots frequently associated with tRNA repeats (29%) (Table 1; Figure S6). All together, 9.5% of all D+N LVs' unique CIS-associated ISS were within tRNA repeats, whereas neither tRNA nor rRNA repeats were found in the hotspot-contained IS of the INwt LVs ( $n = 8,450$ ) (Figure S6B). Analysis of all CIS-associated UH-IS confirmed that both IN-modified LVs had significantly more intergenic IS than the control vector (Figure 4A). INwt-LVs' CIS-associated IS localized into or near protein-encoding genes more frequently than those of D+H LVs, and the latter targeted RNA genes more often than the control vector. Genes and pseudogenes of the ribosomal proteins L and S (RPL and RPS, respectively) contained in the large and small ribosome subunits were also frequently associated with the CIS of the D+H LVs (Table 1).

The repeat-associated ISS make up at least one-third of the total IS number in the IN-fusion protein LVs, and a more accurate representation of genomic features and gene types preferentially targeted for integration by these vectors could be obtained by analyzing CIS in a combined dataset containing both the UH- and the MH-IS. In this analysis, the D+H LVs' strongest CIS was now identified in the 28S rRNA gene, and it contained 19% ( $n = 1367$  IS) of all ISS (Table 2; Figure S7A). The strongest CIS of the D+N vectors also localized into the 28S rRNA gene with 2.5% of all IS. Integration targeting to the most preferred locus was again the weakest for LV INwt, as only 0.3% ( $n = 68$  ISs) of the vector's IS localized to the strongest CIS (Table 2; Figure S7A). Inclusion of the MH data into the CIS analysis enabled the detection of new repetitive gene types, such as 5S rRNA (RNA5S) and srpRNA genes, in the integration hotspots of the IN-modified LVs (Table 2). The characteristic preferences of these

### Figure 3. Characterization of Vector Integration within the Repetitive Genome and rDNA

(A) Integration frequency into different repeat types within the repetitive genome. (B) Total efficiency of integration targeting into an rDNA unit (including the rRNA coding region and the IGS) and within a 235-bp window around the I-PpoI site. For the ddPCR-based quantification of I-PpoI site-directed integration, the mean (with SEM) of six measurements is shown. (C–E) Coverage plots where read coverage on the positive strand (+ve; scale on the right y axis) is shown with a darker shade and on the negative strand (–ve; scale on the left y axis) with a lighter shade for each LV type. (C) A large-scale view of IS read localization within the Chr21 locus containing annotated rRNA genes (window size, 50 kb). (D) A closeup view of IS distribution within the 28S rRNA gene (window size, 1.6 kb). (E) Illustration of the reads mapping within and near the I-PpoI site (shown with purple fonts). Window size, 300 bp. \*Repeatmasker-identified repeats without manual correction and annotation of additional rRNA gene unit features. \*\*Repeatmasker-identified repeats. □: integration frequency within an area extending 203 bp upstream and 32 bp downstream of the cleaved I-PpoI site (see Figure S3 for details).

**Table 1. Characterization of the Strongest Integration Hotspots among the Uniquely Mappable IS**

|           | Rank | IS #            | Median Location | Gene <sup>a</sup>              | Repeat <sup>a,b</sup> | Nearest RefSeq Gene | Dimension (kB) |
|-----------|------|-----------------|-----------------|--------------------------------|-----------------------|---------------------|----------------|
| INwt (UH) | 1    | 67              | chr16:1633220   | CRAMP1                         | SINE/Alu              |                     | 524            |
|           | 2    | 53              | chr8:144306704  | HSF1                           | LINE/L1               |                     | 475            |
|           | 3    | 52              | chr16:2080539   | TSC2                           | SINE/Alu              |                     | 334            |
|           | 4    | 44              | chr11:66094636  | PACS1                          | LINE/L1               |                     | 465            |
|           | 5    | 35              | chr11:65566836  | intergenic                     | NA                    | SSSCA1-AS1          | 235            |
|           | 6    | 33              | chr16:688665    | WDR24                          | NA                    |                     | 368            |
|           | 7    | 31              | chr1:1334252    | TAS1R3                         | NA                    |                     | 184            |
|           | 8    | 28              | chr19:1199664   | intergenic                     | NA                    | STK11               | 223            |
|           | 9    | 27              | chr6:30681690   | PPP1R18                        | SINE/Alu              |                     | 317            |
|           | 10   | 25              | chr17:81593484  | NPLOC4                         | DNA/hAT-Charlie       |                     | 163            |
|           | 11   | 22              | chr17:82147186  | CCDC57                         | simple                |                     | 279            |
|           | 12   | 21              | chr9:128599563  | SPTAN1                         | SINE/Alu              |                     | 311            |
|           | 13   | 19              | chr12:49150673  | intergenic                     | SINE/Alu              | TUBA1B              | 247            |
|           | 13   | 19              | chr19:49842535  | PTOV1-AS1                      | SINE/Alu              |                     | 157            |
|           | 14   | 18              | chr6:31687953   | ABHD16A                        | NA                    |                     | 182            |
| 14        | 18   | chr10:112589294 | VTI1A           | LTR/ERV-MaLR                   |                       | 174                 |                |
| 15        | 17   | chr11:65218552  | SLC22A20P       | NA                             |                       | 166                 |                |
| 15        | 17   | chr17:81880539  | intergenic      | LINE/L1                        | ALYREF                | 84                  |                |
| D+H (UH)  | 1    | 12              | chr6:27631516   | intergenic                     | (tRNA)                | LINC01012           | 37             |
|           | 2    | 11              | chr6:28658243   | intergenic                     | tRNA                  | LINC00533           | 86             |
|           | 3    | 10              | chr5:140711372  | VTRNA1-1                       | NA                    |                     | 8              |
|           | 4    | 9               | chr2:38482053   | LOC101929596 (RPLP0P6)         | NA                    |                     | 1              |
|           | 4    | 9               | chr3:182901763  | ATP11B                         | NA                    |                     | 0              |
|           | 4    | 9               | chr20:30512867  | intergenic                     | LSU-rRNA_Hsa          | MLLT10P1            | 1              |
|           | 5    | 6               | chr2:131102011  | intergenic                     | NA                    | PLEKHB2             | 69             |
|           | 5    | 6               | chr2:132279863  | intergenic                     | LSU-rRNA_Hsa          | ANKRD30BL           | 0              |
|           | 6    | 5               | chr11:65611215  | MAP3K11                        | NA                    |                     | 55             |
|           | 6    | 5               | chr17:81897445  | ANAPC11                        | NA                    |                     | 52             |
|           | 6    | 5               | chr20:44466866  | intergenic (RPL37AP1)          | NA                    | LINC01620 /C20orf62 | 0              |
|           | 7    | 4               | chr1:8866735    | ENO1                           | NA                    |                     | 17             |
|           | 7    | 4               | chr1:174904258  | RABGAP1L                       | SINE/Alu              |                     | 48             |
|           | 7    | 4               | chr2:3577177    | RPS7                           | SINE/Alu              |                     | 19             |
|           | 7    | 4               | chr2:27050883   | intergenic                     | (tRNA)                | AGBL5-AS1           | 30             |
|           | 7    | 4               | chr4:145884509  | ZNF827                         | NA                    |                     | 47             |
|           | 7    | 4               | chr5:122352156  | SNCAIP                         | NA                    |                     | 37             |
|           | 7    | 4               | chr6:153282725  | intergenic (RPL27AP6)          | NA                    | RGS17               | 32             |
|           | 7    | 4               | chr10:125738308 | EDRF1                          | NA                    |                     | 0              |
|           | 7    | 4               | chr11:77886544  | INTS4/AAMDC                    | LSU-rRNA_Hsa          |                     | 15             |
|           | 7    | 4               | chr12:56175248  | SMARCC2                        | SINE/Alu              |                     | 22             |
|           | 7    | 4               | chr16:685472    | WDR24                          | NA                    |                     | 29             |
|           | 7    | 4               | chr19:1131901   | SBNO2                          | NA                    |                     | 36             |
| 7         | 4    | chr19:12894097  | GCDH (RPS6P25)  | NA                             |                       | 36                  |                |
| 7         | 4    | chr21:8415028   | intergenic      | simple (45S rRNA) <sup>c</sup> | MIR6724-1             | 39                  |                |
| 7         | 4    | chrX:135542502  | INTS6L          | SINE/Alu                       |                       | 0                   |                |

(Continued on next page)

Table 1. Continued

|          | Rank | IS # | Median Location | Gene <sup>a</sup> | Repeat <sup>a,b</sup> | Nearest RefSeq Gene | Dimension (kB) |
|----------|------|------|-----------------|-------------------|-----------------------|---------------------|----------------|
|          | 1    | 10   | chr6:27631467   | intergenic        | tRNA                  | LINC01012           | 167            |
|          | 2    | 7    | chr8:144456689  | CYHR1             | NA                    |                     | 114            |
|          | 3    | 5    | chr11:66348159  | LOC102724064      | tRNA                  |                     | 7              |
|          | 3    | 5    | chr12:56190397  | intergenic        | tRNA                  | SMARCC2             | 0              |
|          | 3    | 5    | chr19:3982952   | EEF2              | NA                    |                     | 6              |
|          | 4    | 4    | chr5:140711372  | VTRNA1-1          | NA                    |                     | 8              |
|          | 5    | 3    | chr1:951876     | NOC2L             | NA                    |                     | 6              |
|          | 5    | 3    | chr1:145157237  | intergenic        | tRNA                  | LOC103091866        | 0              |
|          | 5    | 3    | chr1:156312177  | CCT3              | NA                    |                     | 8              |
|          | 5    | 3    | chr2:27050871   | intergenic        | tRNA (SINE/Alu)       | AGBL5-AS1           | 15             |
| D+N (UH) | 5    | 3    | chr5:178204539  | HNRNPAB           | NA                    |                     | 38             |
|          | 5    | 3    | chr5:181236966  | RACK1             | NA                    |                     | 51             |
|          | 5    | 3    | chr7:5634480    | RNF216            | NA                    |                     | 39             |
|          | 5    | 3    | chr8:144311250  | HSF1              | NA                    |                     | 5              |
|          | 5    | 3    | chr9:127972911  | FAM102A           | NA                    |                     | 44             |
|          | 5    | 3    | chr9:136375334  | intergenic        | NA                    | SNAPC4              | 8              |
|          | 5    | 3    | chr16:1817574   | HAGH              | NA                    |                     | 18             |
|          | 5    | 3    | chr16:1960749   | NDUFB10           | SINE/MIR              |                     | 15             |
|          | 5    | 3    | chr16:67887498  | NRN1L             | SINE/Alu              |                     | 8              |
|          | 5    | 3    | chr17:8221619   | LINC00324         | tRNA                  |                     | 6              |
|          | 5    | 3    | chr20:63678092  | RTEL1             | NA                    |                     | 4              |

UH, unique hits; NA, not applicable; LSU-rRNA\_Hsa, large subunit (28S) rRNA repeat.

<sup>a</sup>Gene and repeat family in CIS median locus.

<sup>b</sup>Repeat is shown in parenthesis if it is found in > 50% of the reads, but not in the exact CIS median locus.

<sup>c</sup>ISs are placed into the IGS (UCSC genome browser Hg38).

LVs to integrate into tRNA and rRNA repeats and intergenic loci remained the same but became more pronounced (Table 2; Figure S7B). Similarly, the differences between the IN-modified LVs and the control LV in targeting protein-encoding genes, RNA genes and the multiple ribosome subunit genes grew stronger (Figure 4B). Finally, a clear increase in the IS numbers per strongest CIS was observed, owing to the large proportion of MH-IS forming them (Table 2). For the INwt LV, the differences between the two analysis types were much subtler and mainly related to slightly higher IS numbers per identified CIS (Tables 1 and 2). Taken together, the integration hotspots of the IN-modified LVs strongly associate with repetitive RNA-encoding genes and show very little resemblance to the well-characterized hotspots near protein-encoding genes of unmodified LVs.

#### I-Ppol Protein Inclusion Increases Vector Integration in Genomic Features That Are Enriched in Nucleolus-Associated Domains

Nucleolus-associated domains (NADs) are defined chromatin domains that dynamically interact with nucleoli.<sup>27</sup> Enrichment of pseudogenes in NADs has been characterized in plants,<sup>28</sup> and the ribosomal protein encoding genes are known to have multiple processed pseudogenes in the human genome. Also, specific gene families and genes, such as those encoding for tRNAs and the protein constituents

of the ribosomes, are enriched in NADs.<sup>29–34</sup> Since these gene types were frequently hit by the IN-modified LVs (Figures 3A and 4B) and identified in their integration hotspots (Tables 1 and 2; Figures S6 and S7), we asked whether additional similarities would exist between the identified CIS loci and NAD-contained regions. After annotating the ISs of the different LVs with pseudogenes, we found that integration in pseudogenes occurred more frequently with the IN-modified LVs than with the control LV (Figure 5A). When the pseudogene-annotations were used in place of the original NCBI Reference Sequence Database (Refseq) gene annotations, integration was found to be more frequent also in RPL and RPS gene-derived sequences with the IN-modified LVs than with the INwt LVs (Figure 5A). In addition to these structural proteins of the ribosomes, also larger groups of genes related to ribosome biogenesis contained more integrations with the IN-modified LVs than with the control LV (Figure 5B).

Significantly enriched Gene Ontology (GO) terms among NAD genes include ribosome, mitochondrion, cytosolic large/small ribosomal subunit and nucleolus.<sup>29</sup> A GO-analysis of the CIS-engaged genes revealed that several pathways and processes related to ribosome structure and function were enriched among the genes preferentially targeted for integration by the IN-fusion protein LVs and that similar

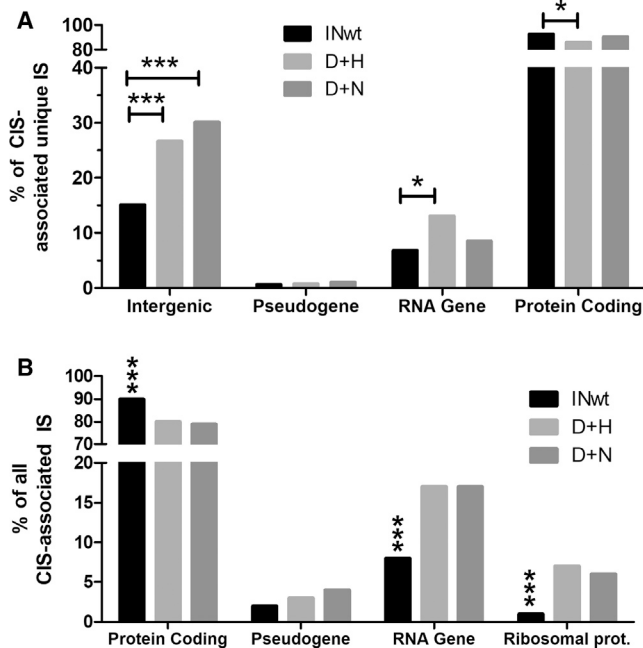

**Figure 4. Characterization of CIS-Associated IS**

(A) All unique IS associated with CIS were analyzed for their occurrence in intergenic loci, pseudogenes, ncRNA genes (“RNA genes”) and protein-encoding genes. The proportions of IS within each feature are shown as a percentage of all CIS-associated UH-IS. The numbers of CIS-contained IS are as follows: 8,450 for LV INwt, 333 for LV D+H, and 81 for LV D+N. (B) Characterization of the proportion of IS localizing to protein-encoding genes, pseudogenes, ncRNA genes, and ribosomal protein-encoding genes (RPL and RPS genes) of all CIS-associated IS (UH-MH-CIS). The numbers of all CIS-associated IS are as follows: 2,506 for LV D+H, 498 for LV D+N, and 10,367 for LV INwt. The differences between the vectors were analyzed with two-sided Fisher’s exact test (D+H LVs versus D+N LVs) or with two-sided chi-square test (INwt LV compared to D+H or D+N LVs). \*\*\* $p < 0.001$ ; \* $p < 0.05$ . In (B), the asterisks are shown only for INwt LV, whose difference to each IN-modified LVs was similar. Ribosomal prot., genes encoding for the protein constituents of mature ribosomes.

GO-terms were enriched as among NAD-associated genes (Figures 5C and 5D; Data S2). Interestingly, also mitochondria-related terms were enriched for D+N LVs, but not for D+H LVs. For the INwt LV, no enrichment of ribosomal structure or function-related terms was observed (Figure 5E). In line with previous studies,<sup>36</sup> the most enriched pathways and processes were instead related to cell cycle and its control as well as chromatin organization. The similarities between NAD-associated features and the gene types preferentially targeted for integration by the IN-fusion protein LVs indicates that the localization of a chromosomal region close to nucleoli is an additional determinant of the vectors’ preferential integration, in addition to the primary sequence recognized by I-PpoI.

#### Integration Targeting and Cellular Responses to Transduction in Primary Human T Cells

Having confirmed rDNA-targeted integration in both the slowly and finitely dividing lung fibroblast cells (MRC-5) and in the non-

cancerous but immortalized retinal pigment epithelium cells (hTERT-RPE1), we asked how the IN-modified vectors would perform in the transduction of primary human T cells, which represent a relevant cell type for clinical gene and cell therapy. For this aim, T cells from two individuals were enriched, transduced with the different LVs, and assayed for targeted integration and different indicators of cell health and cytotoxicity. Estimation of targeted integration at day 10 post-transduction with the ddPCR-based method showed that up to 8% of the D+H LV integration events reside in the immediate vicinity of the I-PpoI site in the 28S rRNA gene, the mean targeting efficiencies ranging from 2.6% to 5.7% (Figures 6A and 6B; Tables S8 [day 2] and S9 [day 10]). With the INwt control LVs, the mean targeting efficiencies were 0.0%–0.1%.

The number of metabolically active live cells was determined to study if T cells transduced with the D+H-containing LVs proliferate similarly to cells transduced with the control LV. In a test using 5,000 vector particles (5k vp) per cell, the number of viable cells was the highest in the INwt LV group, and no differences between the groups were observed that could be specifically addressed to the IN content of the modified LVs (Figures S8A and S8B). When using a higher vector dose of 10k vp/cell, the only test group having significantly fewer metabolically active cells in comparison to the INwt control at the last time point assayed was the D+H LV group, whose mean cell numbers were 81%–85% of those of the control vector (Figures S8C and S8D).

Next, it was studied whether the cleavage of rRNA genes and subsequent transgene integration would cause direct cytotoxicity or induce apoptosis that is followed by secondary necrosis. Of the three LVs tested, a statistically significant increase in the apoptosis signal in relation to untreated cells was observed only for LV D+N at day 3 post-transduction (5k vp/cell,  $p < 0.05$ ) (Figure S9). An elevated necrosis signal was observed for INwt LVs in altogether three time points ( $p < 0.05$ ,  $p < 0.01$ , and  $p < 0.001$ ), and for D+H LV at one time point ( $p < 0.05$ ) in comparison to non-transduced cells (Figure S10). Etoposide-treated cells were positive for apoptosis induction at day 1 and for necrosis at days 2 and 3 post-treatment (Figures S9 and S10). Since there was no increase of necrosis in T cells that would be clearly attributable to the D+H content of the vectors, it is likely that the decrease in cell numbers we observed in the viability test results from a moderate slowdown of division and/or metabolism in LV D+H-transduced cells.

As learned from studies using the Cas nucleases, target DNA cleavage can cause different types of mutations and rearrangements of genomic DNA, including large deletions.<sup>37–40</sup> rDNA represents a recombination hotspot in meiotic cells and in cancer, hence the number of rRNA genes can vary substantially both between and within individuals.<sup>8,41–44</sup> To see if the number of rRNA genes would be affected by the use of D+H LVs, we quantitated the 18S rRNA gene (RNA18S) copies in transduced T cells at day 2 post transduction. Consistent with previous studies,<sup>8</sup> the mean gene copy numbers or rRNA genes varied between 478 and 701 per cell, and no statistically significant



**Table 2. Characterization of the Strongest Integration Hotspots among All IS**

|              | Rank | IS #           | Median Location       | Gene <sup>a</sup>    | Repeat <sup>a,b</sup> | Nearest RefSeq Gene | Dimension (kB) | MH%   |
|--------------|------|----------------|-----------------------|----------------------|-----------------------|---------------------|----------------|-------|
| INwt (UH+MH) | 1    | 68             | chr16:1639939         | CRAMP1L              | NA                    |                     | 524            | 1.5   |
|              | 2    | 61             | chr16:2083750         | TSC2                 | NA                    |                     | 334            | 14.8  |
|              | 3    | 57             | chr8:144321862        | DGAT1                | NA                    |                     | 475            | 7.0   |
|              | 4    | 51             | chr11:66093177        | PACS1                | LINE/L1               |                     | 465            | 13.7  |
|              | 5    | 38             | chr11:65553655        | LTBP3                | NA                    |                     | 258            | 7.9   |
|              | 6    | 34             | chr1:1336483          | DVL1                 | NA                    |                     | 184            | 8.8   |
|              | 7    | 33             | chr16:688665          | WDR24                | NA                    |                     | 368            | 0.0   |
|              | 8    | 31             | chr19:26670953        | centromeric          | Satellite/centromere  | LINC00662           | 544            | 100.0 |
|              | 9    | 30             | chr6:30665510         | DHX16                | NA                    |                     | 317            | 10.0  |
|              | 10   | 28             | chr19:1199664         | intergenic           | NA                    | STK11               | 223            | 0.0   |
|              | 11   | 26             | chr17:81592393        | NPLOC4               | NA                    |                     | 163            | 3.8   |
|              | 12   | 25             | chr17:82142721        | CCDC57               | NA                    |                     | 371            | 12.0  |
|              | 12   | 25             | chr22:50382044        | PPP6R2               | LINE/L1               |                     | 279            | 28.0  |
|              | 13   | 23             | chr9:128606115        | SPTAN1               | SINE/Alu              |                     | 311            | 8.7   |
|              | 14   | 22             | chr12:49147302        | intergenic           | SINE/Alu              | TUBA1A              | 247            | 13.6  |
| 15           | 21   | chr19:49849663 | PTOV1-AS1             | NA                   |                       | 157                 | 9.5            |       |
| D+H (UH+MH)  | 1    | 1367           | chr21:8444914         | RNA28SN1             | LSU-rRNA_Hsa          | MIR6724-4           | 135            | 99.7  |
|              | 2    | 130            | chr14:49862760        | RN7SL2               | srpRNA/7SLRNA         |                     | 9              | 100.0 |
|              | 3    | 53             | chr14:49586605        | RN7SL1               | srpRNA/7SLRNA         |                     | 0              | 100.0 |
|              | 4    | 37             | chr20:30512867        | intergenic           | LSU-rRNA_Hsa          | MLLT10P1            | 0              | 75.7  |
|              | 5    | 34             | chr2:132279864        | intergenic           | LSU-rRNA_Hsa          | ANKRD30BL           | 0              | 82.4  |
|              | 6    | 33             | chr11:77886544        | INTS4/AAMDC          | LSU-rRNA_Hsa          |                     | 30             | 87.9  |
|              | 7    | 29             | chr6:27631414         | intergenic           | (tRNA)                | LINC01012           | 163            | 48.3  |
|              | 7    | 29             | chr17:8187235         | intergenic           | tRNA                  | MIR4521             | 111            | 93.1  |
|              | 8    | 26             | chr1:228646038        | RHOU/DUSP5P1/RNA5S17 | 5S rRNA               |                     | 3              | 100.0 |
|              | 9    | 23             | chr19:50128415        | SNAR-A11             | NA                    |                     | 11             | 100.0 |
|              | 10   | 21             | chr6:125780266        | intergenic           | tRNA                  | NCOA7               | 43             | 90.5  |
|              | 11   | 19             | chr1:237603123        | RYR2                 | LSU-rRNA_Hsa          |                     | 0              | 84.2  |
|              | 12   | 15             | chrX:109054236        | intergenic           | LSU-rRNA_Hsa          | MIR6087             | 0              | 100.0 |
|              | 13   | 14             | chr16:3191572         | intergenic           | tRNA                  | OR1F1               | 83             | 85.7  |
|              | 13   | 14             | chr21:17454798        | intergenic           | tRNA                  | LINC01549           | 0              | 100.0 |
| 13           | 14   | chr22:32039474 | intergenic (RPS17P16) | NA                   | SLC5A1                | 0                   | 78.6           |       |
| 14           | 13   | chr8:69690270  | SLCO5A1               | LSU-rRNA_Hsa         |                       | 0                   | 76.9           |       |
| 15           | 12   | chr6:28863698  | intergenic            | tRNA                 | LINC01623             | 192                 | 66.7           |       |
| D+N (UH+MH)  | 1    | 73             | chr21:8444904         | intergenic           | LSU-rRNA_Hsa          | MIR6724-4           | 12             | 100.0 |
|              | 2    | 47             | chr17:8125819         | intergenic           | (tRNA)                | HES7                | 108            | 91.5  |
|              | 3    | 29             | chr14:49862666        | RN7SL2               | srpRNA/7SLRNA         |                     | 0              | 100.0 |
|              | 4    | 22             | chr6:27618534         | intergenic           | SINE/Alu (tRNA)       | LINC01012           | 167            | 54.5  |
|              | 5    | 15             | chr5:181207830        | intergenic           | tRNA                  | TRIM7               | 68             | 80.0  |
|              | 5    | 15             | chr16:3191501         | intergenic           | tRNA                  | OR1F1               | 16             | 93.3  |
|              | 6    | 11             | chr6:125780305        | intergenic           | tRNA                  | NCOA7               | 0              | 100.0 |
| 6            | 11   | chr14:49586625 | RN7SL1                | srpRNA/7SLRNA        |                       | 0                   | 90.9           |       |
| 6            | 11   | chr19:50128411 | SNAR-A11              | NA                   |                       | 16                  | 100.0          |       |
| 7            | 9    | chr19:46811031 | intergenic            | SINE/Alu             | SNAR-E                | 20                  | 77.8           |       |

(Continued on next page)

Table 2. Continued

| Rank | IS # | Median Location | Gene <sup>a</sup>     | Repeat <sup>a,b</sup> | Nearest RefSeq Gene | Dimension (kB) | MH%   |
|------|------|-----------------|-----------------------|-----------------------|---------------------|----------------|-------|
| 8    | 8    | chr1:145287841  | intergenic            | tRNA                  | NBPF20              | 0              | 100.0 |
| 8    | 8    | chr1:161425134  | intergenic            | LINE/L1 (tRNA)        | CFAP126             | 85             | 87.5  |
| 8    | 8    | chr17:82494740  | intergenic            | tRNA                  | NARF                | 0              | 100.0 |
| 8    | 8    | chr19:1021625   | RNU6-2                | snRNA/U6              |                     | 59             | 87.5  |
| 9    | 7    | chr1:228646036  | RHOU/DUSP5P1          | (5S rRNA)             |                     | 2              | 100.0 |
| 9    | 7    | chr5:140711373  | VTRNA1-1              | NA                    |                     | 15             | 42.9  |
| 9    | 7    | chr8:144456689  | CYHR1                 | NA                    |                     | 114            | 0.0   |
| 9    | 7    | chr12:56190397  | intergenic            | tRNA                  | SMARCC2             | 0              | 28.6  |
| 9    | 7    | chr14:58239894  | intergenic            | tRNA                  | ACTR10              | 0              | 100.0 |
| 9    | 7    | chr15:45201222  | intergenic            | tRNA                  | SHF                 | 0              | 100.0 |
| 9    | 7    | chr19:1383594   | intergenic            | tRNA                  | NDUFS7              | 4              | 85.7  |
| 9    | 7    | chr21:17454808  | intergenic            | tRNA                  | LINC01549           | 0              | 100.0 |
| 10   | 6    | chr9:133020150  | intergenic (EEF1A1P5) | NA                    | SNORD141A           | 1              | 100.0 |
| 10   | 6    | chr11:66348155  | LOC102724064          | tRNA                  |                     | 7              | 16.7  |
| 10   | 6    | chr16:68742482  | CDH1                  | 5S rRNA               |                     | 0              | 100.0 |
| 10   | 6    | chr19:4724132   | intergenic            | tRNA                  | DPP9                | 0              | 100.0 |

MH%, fraction of the multiple hit (MH)-IS of all CIS-forming IS; UH, unique hits; NA, not applicable; LSU-rRNA\_Hsa, large subunit (28S) rRNA repeat.

<sup>a</sup>Gene and repeat family in CIS median locus.

<sup>b</sup>Repeat is shown in parenthesis if it is found in >50% of the reads, but not in the exact CIS median locus.

differences were observed between the non-transduced cells and D+H or INwt LV-transduced cells (Figure 6C; Table S10). To address the occurrence of larger deletions potentially affecting whole acrocentric chromosome arms, we studied the copy number of the distal junction (DJ) sequence that flanks the rRNA array at the telomeric side.<sup>45</sup> Similar to the rRNA genes, no statistically significant differences were observed between the three groups, and 13 to 18 copies of these sequences were detected per cell (Figure 6D). In conclusion, transduction with the 28S rRNA gene-cleaving D+H LVs does not cause detectable variations in the rRNA gene nor in the DJ sequence copy numbers in T cells.

Cleavage of the rRNA gene and transgene integration into it can affect the transcription of both the rDNA and the provirus. To address the question of whether vectors integrated into the I-PpoI site become transcribed, we analyzed total RNA extracted from D+H and INwt LV-transduced T cells at days 2 and 10 post-transduction with site-specific RT-ddPCR. Vector sequence-containing rRNA transcripts were detected at both time points and only in the D+H LV group, confirming that proviruses within the targeted 28S rRNA gene become transcribed (Tables S11 and S12).

## DISCUSSION

In this study, we show that LV integration can be directed to the rDNA of normal human cells with an unprecedentedly high efficiency when transduction is coupled with target site cleavage. In non-selected MRC-5 cells, the vectors carrying an endonuclease with reduced DNA cleaving activity integrated 266 times more frequently

into rDNA than the control vectors and 8.2 times more than LVs whose IN-endonuclease content can only bind the target DNA. Other researchers have attempted to direct the integration of recombinant adeno-associated virus vectors (rAAVs) to the same locus but achieved only modest efficiencies: the increase in targeted integration was 8- to 13-fold in comparison to control vectors,<sup>46</sup> and 2%–3% of selected hepatocytes were estimated to have the intended integration event within the 28S rRNA gene.<sup>47</sup> The LVs characterized in our study promote much higher rDNA targeting, but further comparisons with the rAAVs are challenging due to profound differences in the study designs, IS analysis methods, and in the numbers of IS retrieved ( $n = 12$ –176 for the rAAVs).<sup>46,47</sup> In addition to rAAVs, also non-viral vectors have been developed to target integration into the rDNA genomic safe harbor locus.<sup>48,49</sup> However, in these studies, the levels of both transfection and targeted integration were low, and the analysis lacked thorough examination of the potential off-target integration events.

Our primary focus was to characterize both the complete integrome and the integration targeting efficiency of two IN-modified LVs as comprehensively as possible, which was achieved through the analysis of all ISs at an early time point where minimal clonal expansion of transduced cells had occurred. Analysis of LV D+H-transduced MRC-5 cells at later time points with ddPCR revealed that the efficiency of integration targeting into the 28S rRNA gene-contained I-PpoI site is at least two times higher than resolved through IS sequencing, reaching 21% of all proviruses. When comparing unselected and Zeocin-selected hTERT-RPE1 cells, we found that the

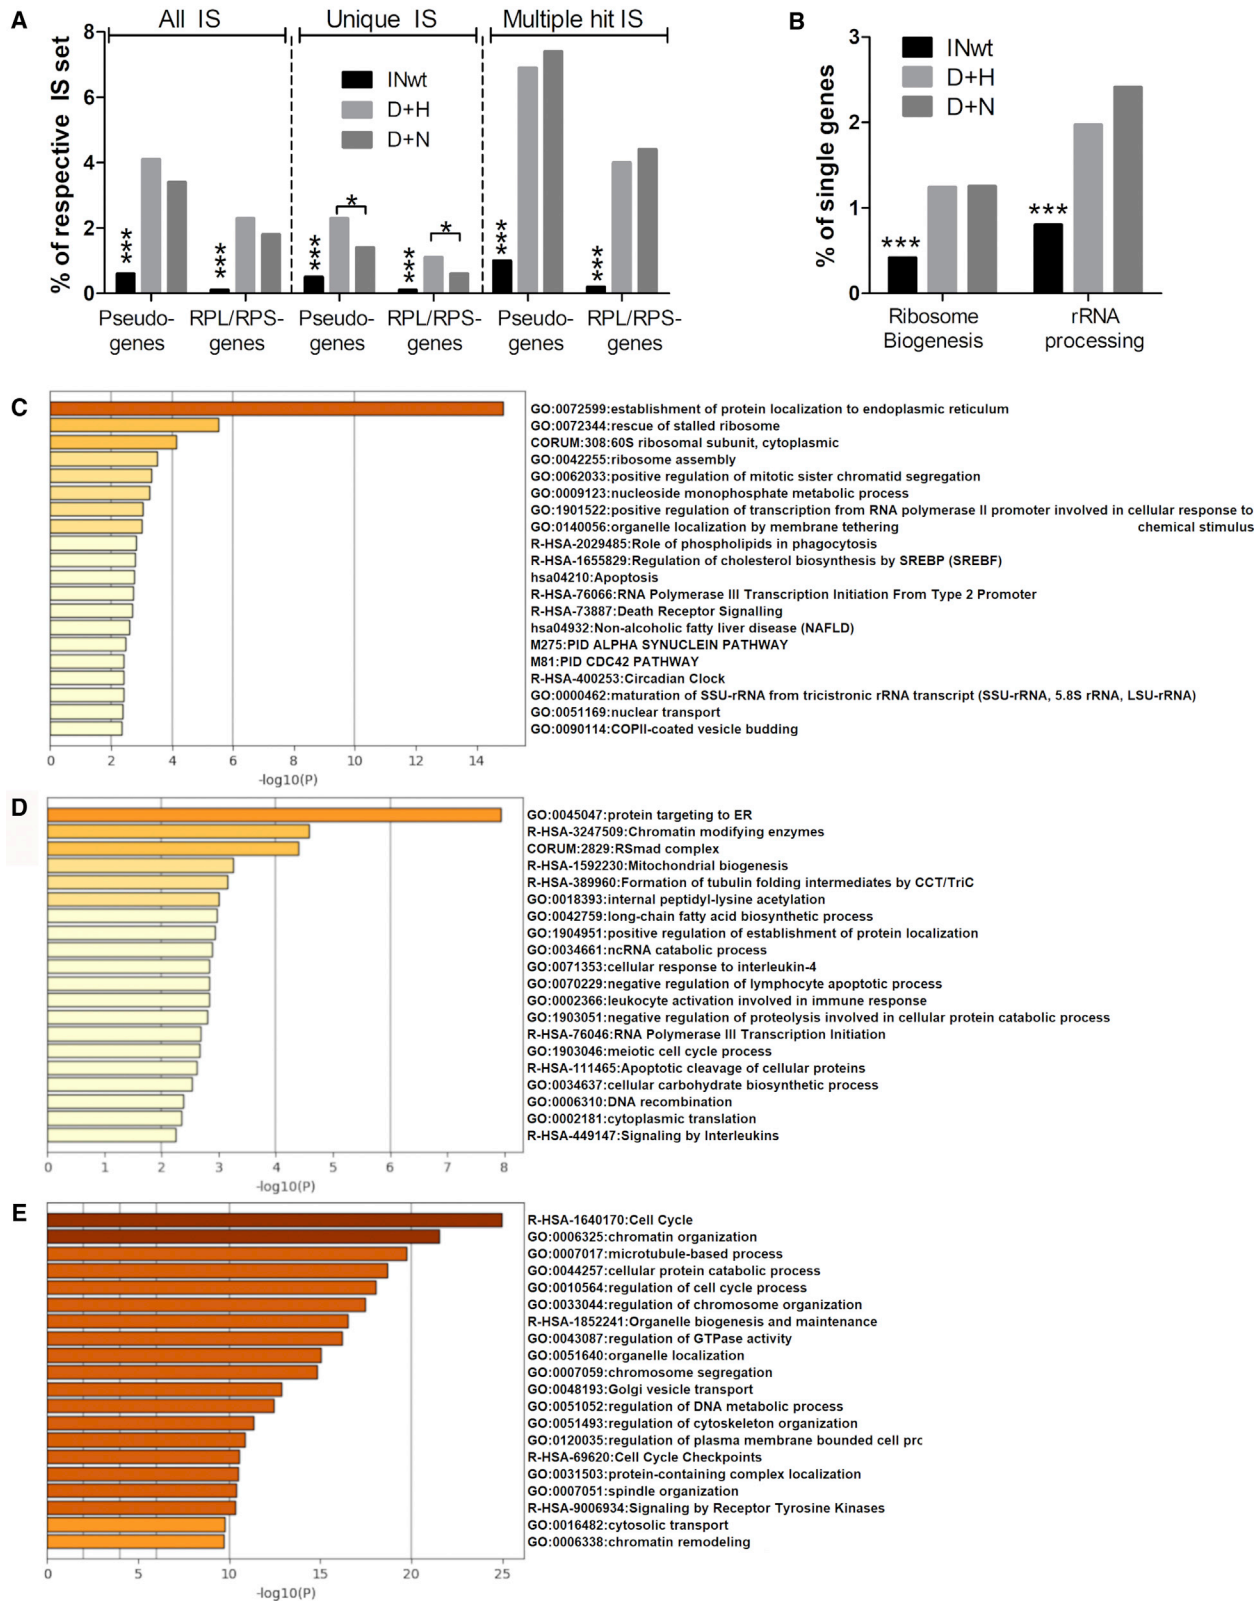

(legend on next page)

proportion of proviruses remained stable in this repetitive DNA locus over time. Transduction tests with primary human T cells confirmed that integration within the I-PpoI site is increased also in this clinically relevant cell type, albeit to a lower degree than observed in the MRC-5 cells.

Subsampling and partitioning errors are known sources for variability in ddPCR, and its precision is decreased at the extremes.<sup>50,51</sup> Other factors that can have contributed to the observed differences between the tested cell types include inherent differences in their replication kinetics and susceptibilities to transduction with LVs, lot-to-lot variability between the produced vectors, and a limited number of replicates analyzed per sample. On the other hand, with the IS sequencing method, the number of unique integrations within a highly targeted locus is easily underestimated due to saturation of potential unique MuA transposition sites and read lengths that were used to differentiate individual integrations from PCR-borne replicates. Despite the differences in efficiencies that likely originated from subsampling-related issues, the ddPCR-based method clearly demonstrated that D+H LVs catalyze targeted integration in both primary and cultured cells.

Cleavage of the 28S rRNA gene, its subsequent repair, and simultaneous insertion of proviruses into it could cause genomic rearrangements in this highly repetitive locus, including large deletions. We tested for this possibility and found no signs of gross deletions in the acrocentric chromosomes or in the rRNA genes after transduction with the D+H LVs. A moderate reduction in viable cell numbers was observed in LV D+H-transduced T cells at day 4 after transduction, but no clear indications of cytotoxicity were evident. rRNA gene transcription is halted upon DSB introduction into rDNA, which causes the formation of specific nucleolar cap structures and facilitates repair of the lesions (reviewed in Larsen and Stucki<sup>52</sup>). The observed reduction in the numbers of metabolically active cells may hence have resulted from the decreased production of the building blocks for ribosomes, which directly affects the metabolic activity of the cell. At days 2 and 10 post-transduction, we were able to detect provirus-containing transcripts from the 28S rRNA gene, which proves that transcription of this locus and the genetic material inserted into it is recommenced after DSB repair.

By analyzing the complete integrome of the modified LVs in MRC-5 cells, we found that proviruses residing outside of the targeted rDNA locus had a lower tendency to integrate within genes and oncogenes but showed a higher preference toward genomic features that are also enriched in NADs, chromatin domains that co-localize with rRNA gene arrays in the three-dimensional organization of the

genome.<sup>28–34</sup> One explanation for the preferential targeting to these loci could be that nicks or DSBs occurring randomly in NAD-containing chromosomes capture a proportion of vector genomes that were tethered to nucleolar proximity by the LV-contained I-PpoI protein. For the D+N LVs, the localization of genomic regions in NADs seems to be a stronger determinant of integration hotspot site selection than the distance to an I-PpoI site. The transcriptional status of transgenes inserted into NADs and further verification of this phenomenon remain to be addressed with additional techniques in the future. To our knowledge, this is the first description of distinct genomic regions that are distant from one another on the linear axis of DNA but near in the three-dimensional genome to become jointly affected when site-specific transgene integration was pursued based on primary DNA sequence recognition. This observation may have utility in the prediction of possible off-target sites also when using other nucleases for genome editing, such as the CRISPR/Cas system.

The most desired integrating vectors in gene therapy are those that can direct transgenes into genomic safe-harbor sites to minimize the risks related to insertional mutagenesis. LVs have many benefits as vectors, but their integration profile may endanger normal cellular gene function. First attempts to direct LV integration to specific sites were based on IN-fusion proteins,<sup>53</sup> and more recent approaches relied on new chromatin binding preferences assigned for the IN-tethering LEDGF proteins.<sup>54–57</sup> After our first report of using LVs for protein transduction without the previously necessary Vpr-protein fusions,<sup>58</sup> many studies have described different LV- or retrovirus vector (RV)-based virus-like particles, or nanoparticles, to transport desired proteins into cells often with the aim of delivering DNA-editing or integration-targeting enzymes.<sup>59–68</sup> In addition, LVs and RVs can deliver these components into cells as transgenes (reviewed in Chen and Gonçalves<sup>69</sup>) or messenger RNA.<sup>70–72</sup> Systems in which single-vector particles contain both the donor DNA and the enzymes required for targeted integration are superior to multi-construct approaches that may suffer from decreased efficiency if only a fraction of the intended components reach target cells. The majority of recent studies aiming for genome editing and targeted integration utilize the CRISPR/Cas system. With the help of different technical advances and the discovery of alternative Cas variants, it has been possible to improve the specificity of targeted genome modifications (reviewed in Broeders et al.<sup>73</sup>), but major concerns related to the safety<sup>37–40</sup> and efficacy of the CRISPR-based approaches remain, precluding their wide utility in the clinic at the moment.

In comparison to most genomic safe harbor (GSH) site candidates, rDNA is unique, owing to its repetitive gene context. This feature

### Figure 5. Characterization of Preferential LV Integration in Specific Gene Sets and Gene Ontology Terms

(A) Integration frequency within pseudogenes and ribosomal protein genes or pseudogenes derived of them. (B) Integration frequency in gene sets involved in ribosome biogenesis (ribosome biogenesis in eukaryote SuperPath<sup>35</sup>) and rRNA processing (rRNA processing in the nucleus and cytosol SuperPath<sup>35</sup>). (C–E) Enrichment heatmaps of the most overrepresented pathways and processes among genes present in the CIS-engaged integration sites, colored by p values. Heatmap in (C), for D+H LVs; in (D), for D+N LVs; and in (E), for INwt LVs. RPL/RPS genes, large subunit ribosomal proteins/small subunit ribosomal proteins, respectively, or pseudogenes derived of these genes. In (A) and (B), the differences between the datasets were calculated with two-sided chi-square tests. \*\*\*p < 0.001; \*p < 0.05.

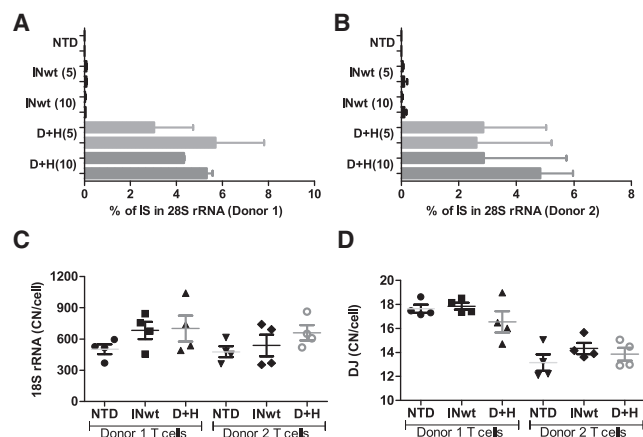

**Figure 6. Quantification of Targeted Integration in the 28S rRNA Gene and Detection of Potential Deletions in the rRNA Gene and in the Short Arms of the Acrocentric Chromosomes**

(A and B) The proportion of vectors integrated near the I-PpoI site in the 28S rRNA gene was quantitated with ddPCR. The vector dose used (5k and 10k vp/cell) is shown in parenthesis after the LV abbreviation. The values of the two analyzed wells per vector and vp-dose combinations are shown (mean with SEM from duplicate measurements per sample; see also Table S9) with the results from T cells extracted from donor 1 shown in (A) and T cells from donor 2 in (B). (C and D) The copy number of the 18S rRNA gene (C) and the DJ region (D) were quantitated from T cells transduced with 10k vp/cell at day 2 post-transduction. The same sample replicates were used as in (A) and (B). These four measurements per vector group (Table S10) are shown with their mean and SEM. The differences in copy numbers were analyzed with one-way ANOVA by comparing the vector-groups' values to the same donor's NTD control with Dunnett's multiple comparison test. NTD, non-transduced cells; DJ, distal junction sequence; p.td, post-transduction; rRNA, ribosomal RNA.

could pose challenges to both the cells upon transgene integration and to the stability of the transgene itself, but our results in primary human T cells did not support such concerns nor point to major adverse effects. The most important safety features of rDNA as a GSH include its isolated location from potentially oncogenic protein-encoding genes, and the high number of rRNA genes that remain intact despite transgene integration into the locus. rDNA is typically ruled by RNA polymerase I, but it is also accessible to the RNA polymerase II machinery.<sup>74–77</sup> We show that integration can be targeted to the rRNA gene array with an unprecedented efficiency using modified LVs that carry both the donor DNA molecules and the integration-targeting enzyme within single-vector particles. These LVs can deliver large transgenes, are easy to produce with minor modifications to standard protocols, and are suitable for both *ex vivo* and *in vivo* gene transfer applications, hence potentially advancing the development next generation applications to treat human diseases.

## MATERIALS AND METHODS

### Generation of Third-Generation LVs

Vesicular stomatitis virus G glycoprotein (VSV-G)-pseudotyped third-generation HIV-1-based LVs containing the IN-fusion proteins were produced as described earlier.<sup>15,16,58,78</sup> In brief, monolayers of 293T cells were transfected with the production plasmids using

calcium phosphate transfection. The plasmids used were pRSV-Rev (encoding for HIV-1 Rev), pCMV-VSVG (encoding for VSV-G), pLV1 (vector construct that contains a PGK promoter-driven EGFP transgene), or pLV1-ZeoR (vector construct carrying a PGK promoter-driven *Sh ble* gene), and either one or two of the packaging plasmids encoding for the wild-type integrase (pMDLg/pRRE), the integration-deficient integrase (pMDLg/pRRE-IN<sub>D64V</sub>), the IN-fusion protein with DNA cleavage-disabled I-PpoI (pMDLg/pRRE-IN-I-PpoI<sub>N119A</sub>), or the IN-fusion protein with DNA cleavage-proficient I-PpoI that carries an activity-reducing mutation (pMDLg/pRRE-IN-I-PpoI<sub>H78A</sub>). Culture supernatants were collected 48 hr after transfection, filtered, suspended in phosphate-buffered saline (PBS), and stored at  $-70^{\circ}\text{C}$  until use. Functional vector titers (transducing units [TU]/mL) were estimated through EGFP expression in transduced HeLa cells approximately 68 hr post-transduction, and particle titers were determined based on the level of HIV-1 p24 capsid (CA) antigen using an enzyme-linked immunosorbent assay (PerkinElmer Life and Analytical Sciences, Waltham, MA, USA).

### Cells, Transductions, and Cell Health Assays

All transductions were carried out by diluting the LVs into cell culture medium immediately before use or alternatively by pipetting undiluted LVs directly into cell culture medium. On the day after transduction, vector-containing medium was replaced with fresh medium. All cells were incubated at  $37^{\circ}\text{C}$  in a 5%  $\text{CO}_2$ -containing humidified atmosphere.

For the IS sequencing experiment, human MRC-5 lung fibroblasts (ATCC CCL-171) were used. The cells were cultured in Dulbecco's modified Eagle's medium (DMEM; high-glucose, Sigma D6429) supplemented with 1% penicillin-streptomycin (Sigma, P0781), 1% MEM non-essential amino acids without L-Glutamine (Biowest, cat. X0557-100), 1% sodium pyruvate (Biowest cat. L0642-100), and 10% fetal bovine serum (FBS; Sigma, F7524). On the day before transduction, MRC-5 cells were seeded onto 6-well plates at a density of  $2 \times 10^5$  cells per well. An MOI of 4 was used for transduction with the IN-modified LVs (56k–120k vp/cell) and an MOI 1 for transduction with the INwt LV (1k vp/cell). Cells were pelleted at days 2 and 3 post-transduction and stored at  $-70^{\circ}\text{C}$  until used for DNA extraction and integration site analysis. To study the proportion of IS occurring near the I-PpoI site with ddPCR, MRC-5 cells were seeded as above and transduced in two separate experiments with the EGFP-LVs using 7.5k vp per cell, which equaled MOI 19 for LV INwt. Cells were collected for analysis at day 9 post-transduction.

For the study of targeted integration in unselected and phleomycin D1 selected cells, hTERT-RPE1 cells (ATCC CRL-4000) were used. Cells were cultivated in  $1 \times$  Dulbecco's Modified Eagle Medium: Nutrient Mixture F-12 (DMEM/F-12) (Gibco, 31330-038) supplemented with 10% FBS and 0.01 mg/mL of hygromycin B. On the day before transduction, the cells were seeded onto 6-well plates at a density of  $4 \times 10^5$  cells per well. Transduction was carried out with the *Sh ble* antibiotic resistance gene containing vectors (ZeoR LVs) at a concentration of 5k vp/cell. At day 1 post-transduction, cells



to undergo selection were given culture medium supplemented with Zeocin (Invivogen, ant-zn-05) at a final concentration of 300  $\mu\text{g}/\text{mL}$  and thereafter subcultivated as necessary. Cell pellets were collected for DNA extraction at days 13 and 15 post-transduction and stored at  $-70^{\circ}\text{C}$  until use.

Peripheral blood mononuclear cells (PBMCs) were enriched from two leukoreduction system (LRS) chambers (Finnish Red Cross Blood Service, Helsinki, Finland) using the prefilled Leucosep centrifuge tubes (Greiner Bio-One, #227288). Untouched human T cells were isolated from the PBMCs by using the pan T cell isolation kit (Miltenyi Biotec, #130-096-535Y).  $2.5 \times 10^7$  T cells from both donors were activated with Dynabeads human T-activator CD3/CD28 (Gibco, #11132D) according to the kit protocol. T cells were cultivated in X-Vivo 15 (Lonza, #BE02-060F) supplemented with 5% human AB serum (Biowest, #S4190) and 20 U/mL of human recombinant interleukin-2 (IL-2) (Prospec-Tany Technogene, #CYT-209-b) for 4 days before LV transductions. All transductions were done in triplicate for T cells of both donors using the ZeoR LVs at vector doses of 5k and 10k vp per cell, which equaled MOIs of 5 and 10 of LV INwt-EGFPs, respectively. Cells to be studied for targeted integration with ddPCR were transduced on 24-well plates ( $1.5 \times 10^6$  cells per well) and sampled for analysis at days 2 and 10 post-transduction. For the cells analyzed for viability, apoptosis, and necrosis, the activation beads were removed, and then the cells were seeded on white 96-well plates with clear bottoms (PerkinElmer, View-Plate-96-TC, #6005181) at densities of 6,000 cells per well for the viability assay and 10,000 cells per well for the apoptosis/necrosis assay. After vector removal at day 1 post-transduction, the cells were given fresh medium and the assay reagents according to kit protocols. Etoposide (Cayman Chemical, #12092) was used as a positive control for apoptosis induction and necrosis at a final concentration of 8  $\mu\text{M}$ . The viability of transduced cells was monitored with daily luminescence recording for 4 days (days 1, 2, and 4 post-transduction) using the RealTime-Glo MT cell viability assay (Promega, # G9711). Apoptosis and necrosis were examined with the RealTime-Glo annexin V apoptosis and necrosis assay (Promega, #JA1011) that simultaneously measures annexin V exposure and DNA release to differentiate secondary necrosis occurring during late apoptosis from necrosis caused by other cytotoxic events. Annexin V binding (luminescence) and loss of membrane integrity (fluorescence) were recorded at days 1, 2, and 3 post-transduction.

#### Integration Site Extraction and EGFP Expression Analysis

MRC-5 cells were transduced with an MOI of 1 for the control vector (LV INwt) and 4 for the IN-modified LVs (Table S2). Separate wells were transduced for genomic DNA extraction and for fluorescence-activated cell sorting (FACS) analysis of EGFP expression. Genomic DNA was extracted 2 or 3 days post-transduction using the NucleoSpin tissue kit (Macherey-Nagel, ref. 740952.250) from two separate wells per vector. Vector ISs were extracted with the MuA transposon-based protocol described in Brady et al.,<sup>79</sup> using BtszI for genomic DNA digestion (NEB #R0667S) and primers and linkers listed in the Supplemental Materials and Methods. Primers and oligo-

nucleotides used in the study were ordered from Integrated DNA Technologies, and the MuA transposon used was from Thermo Scientific (F-750, lot # 00383099). Digested DNA was purified before the MuA reactions using Speedbead magnetic carboxylate modified particles (GE Healthcare, part no. 65152105050250). Each of the two individual genomic DNA extractions analyzed per vector were tagged with unique sequence identifiers in both the linker oligo and in the primer (molecular identifier, MID) to minimize sequence carryover between samples and to maximize the resolution of integration sites occurring near each other (Table S2). Amplification of the integration sites was carried out using Phusion Flash PCR master mix (Thermo Scientific, F-548) in two rounds of PCR. In the first PCR, 2  $\mu\text{L}$  of the MuA reaction was used as template. The first PCR program was as follows:  $98^{\circ}\text{C}$  for 10 s, seven cycles of  $98^{\circ}\text{C}$  for 1 s and  $72^{\circ}\text{C}$  for 15 s, 37 cycles of  $98^{\circ}\text{C}$  for 1 s,  $57^{\circ}\text{C}$  for 5 s and  $72^{\circ}\text{C}$  for 15 s, with a final extension at  $72^{\circ}\text{C}$  for 1 min. The amplicons from the first round of PCR were diluted 1:50 with nuclease-free water, and 1  $\mu\text{L}$  of the dilution was used as template for the second round of PCR. The second PCR program was as follows:  $98^{\circ}\text{C}$  for 10 s, seven cycles of  $98^{\circ}\text{C}$  for 1 s,  $67^{\circ}\text{C}$  for 5 s, and  $72^{\circ}\text{C}$  for 15 s, 37 cycles of  $98^{\circ}\text{C}$  for 1 s and  $72^{\circ}\text{C}$  for 15 s, with a final extension at  $72^{\circ}\text{C}$  for 1 min. The amplicons were sequenced in Bio-center Oulu Sequencing Center with an IonTorrent PGM instrument (University of Oulu, Finland). EGFP expression was analyzed with flow cytometry from triplicate wells per vector at the day of genomic DNA extraction from cells fixed with 4% paraformaldehyde in PBS.

#### ddPCR

The primers, assays, materials, and PCR programs used in the different ddPCR reactions are listed in the Supplemental Materials and Methods. ddPCR was carried out according to Bio-Rad's recommended protocol. For the study of integration in the immediate vicinity of the I-PpoI site in MRC-5 cells, genomic DNA was extracted for analysis from cells collected at day 9 post-transduction using QIAGEN's DNeasy blood and tissue kit (ref. 69506) and digested with BsuRI (Thermo Fisher, ref. ER0151) at a concentration of 1 unit/1  $\mu\text{g}$  DNA. Digested genomic DNA was used as template in ddPCR to measure the copy numbers of all vector genomes, episomal vector forms, production plasmid carryover, and integration near the I-PpoI recognition site in the 28S rRNA gene in both sense and anti-sense orientation.

For the ddPCR analysis of targeted integration in Zeocin selected cells, genomic DNA was extracted from hTERT-RPE1 cells pelleted at day 13 (unselected) and 15 (selected) post-transduction and processed for ddPCR as described above. ddPCR analysis consisted of assays measuring the copy numbers of all vector genomes, episomal vector forms, and vectors integrated in sense orientation near the I-PpoI recognition site in the 28S rRNA gene.

For the detection of targeted integration in primary human CD3<sup>+</sup> T cells, genomic DNA was extracted from cells pelleted at days 2 and 10 post-transduction using the AllPrep DNA/RNA mini kit (QIAGEN, #80204). DNA was processed and analyzed with ddPCR

as described for MRC-5 cells above. ddPCR was carried out for two replicate wells of non-transduced cells, INwt-transduced cells, and D+H-transduced cells. Each well's DNA was sampled twice for ddPCR.

Analysis of site-specifically integrated provirus transcription at days 2 and 10 post-transduction was carried out with RT-ddPCR using total RNA extracted from T cells with the AllPrep DNA/RNA mini kit (QIAGEN, #80204) and the protocol established for the detection of targeted integration. One microgram of RNA was treated with DNase I (Thermo Scientific, ref. EN0521) and cDNA synthesis was carried out with a RevertAid RT reverse transcription kit (Thermo Scientific, ref. K1691) with random hexamer primers according to the kit's protocol. Depending on the assay, 0.5–2.0  $\mu$ L of the RT reaction was used as template for RT-ddPCR.

The presence of deletions in the rRNA gene array and in the acrocentric chromosome arms was assayed with ddPCR using genomic DNA extracted from T cells transduced with 10k vp/cell and extracted at day 2 post-transduction. Probes binding to the DJ region, which flanks the rRNA gene array on the telomeric side,<sup>45</sup> and to the 18S rRNA gene were designed and used for the quantification of the respective areas.

## Bioinformatics Data Analysis

### Integration Site Analysis

Single-end FASTQ data files were quality filtered and trimmed by Skewer.<sup>80</sup> The reads were processed to check for the presence of the linker cassette (LC) sequence that was specific for each sample, and for the transposon-linker sequence. After trimming of LC sequences, the set of reads was aligned with vector sequence by BLAT (BLAST-like alignment tool)<sup>81</sup> aligner to subtract potential vector-only reads and to avoid any false positive vector read detection. The reads were then mapped with the LV 3' LTR sequence using a minimum identity threshold of 95%. The LTR mapped part was trimmed, and the rest of the read region was mapped with human genome reference hg38 with minimum identity of 95%. The reads that mapped uniquely or at multiple sites within the genome were separated in the subsequent steps. A threshold of 90% was employed between the ratio of the BLAT score for primary and secondary mapped reads so that reads with a score ratio greater than this were designated as MH-ISs and others as UH-ISs. To simplify analysis of integration within rDNA, the reads mapping to chromosome 21 (chr21) that had exactly same primary and secondary mapping scores were preferred for their alignment positions in the region between chr21:8433222-8446572. Exact sequence duplicates were removed, and reads were filtered using multiple criteria in order to filter out potential duplicates of a single original integration event. Filtering involved restricting the number of non-mapping base pairs before the start of the genomic region (i.e., between LTR and the region mapping to the genome) using a threshold of 4 bp: the reads that had non-mapping base pairs less than or equal to this threshold were further processed to next steps. Next, only reads that had three or fewer base pairs of non-mapping nucleotides

at their 3' end were considered. The reads were compared to one another, and only those reads that had a difference in the number of deleted base pairs at their LTR ends of  $\geq 2$ , and whose ISs and "shear sites" (transposition sites) were at least 3 bp apart from other reads were further processed. The collision sequences among samples were subtracted from each sample, and the final reads were mapped against the pLV1 plasmid sequence to remove remaining artifacts. Finally, the genomic positions were annotated according to the RefSeq from the University of California Santa Cruz (UCSC),<sup>82</sup> and the RepeatMasker rmbblast web version<sup>20</sup> was used to annotate repeat regions. To identify integration into pseudogenes, ISs were also annotated with the retro genes table (Retroposed Genes V9, Including Pseudogenes) obtained from UCSC. Additionally, the oncogenes table (v4 May 2018) was retrieved (<http://www.bushmanlab.org/links/genelists>) and final set of genes obtained from clustered result files were annotated with this set. The plots shown in Figure 3 were generated for rRNA reads by creating bed and bed-graph files using bedtools<sup>83</sup> that were processed by in-house script and R packages (karyoploteR and regioneR).<sup>84,85</sup>

### Analysis of the Integration Frequency in Selected Gene Sets

Integration frequency in gene sets involved in the SuperPaths<sup>35</sup> of ribosome biogenesis in eukaryotes and rRNA processing in the nucleus and cytosol were conducted using single genes (each IS-tagged gene represented once in the gene list comparison) using the IS datasets where pseudogene annotations were used in place of the initial RefSeq gene annotation.

### Analysis of CISs (Integration Hotspot Analysis)

CIS analysis was performed using a graph-based framework for CIS identification<sup>86,87</sup> with a threshold of 50 kb between individual ISs. For the analysis of hotspots, only CISs with a p value of less than 0.05 and with a minimum of three IS were accepted. The CIS analysis was performed separated for the IS datasets containing only uniquely mappable ISs (UH-IS dataset) and for the complete IS datasets (UH and MH IS data). The features in the median CIS positions in Tables 1 and 2 were annotated using the RepeatMasker, RefSeq-gene, and RetrogenesV9 tracks of the UCSC genome browser.

### GO Analysis of the CIS-Associated IS

Analysis of the most overrepresented pathways and processes among genes present in the CIS-engaged IS was performed using Metascape<sup>88</sup> (<http://metascape.org/gp/index.html#/main/step1>) that uses the following ontology sources: KEGG pathway, GO biological processes, Reactome gene sets, canonical pathways, and CORUM (the comprehensive resource of mammalian protein complexes). In the analysis, all genes in the genome are used as the enrichment background and terms with a p value  $< 0.01$ , a minimum count of 3, and an enrichment factor  $> 1.5$  are collected and grouped into clusters based on their membership similarities. Each cluster is represented with the most statistically significant term within that cluster. The analyzed gene lists contained all genes (both hit genes and nearest genes) from the identified CIS using the complete IS data (UH and MH IS).

### Comparison of Recurrent Integration Gene (RIG) Loci with the CIS Foci of INwt LVs

The genomic coordinates from RIG and “hotter zone” (HZ) loci listed by Marini and others<sup>22</sup> were converted to the current genome version (Dec. 2013 [GRGh38/hg38]) assembly using the “LiftOver” tool from the UCSC genome browser database.<sup>89</sup> The average positions of the RIGs/HZs and the INwt LV CIS were compared, and the RIGs and CIS foci that fell within a 100 kb distance from one another were listed in Table S7.

### Statistics

Statistical differences in the integration preferences between LV groups were calculated using a two-sided Fisher’s exact test and with a two-sided Chi-square test. Statistical comparisons between groups in the viability and necrosis assays were done with repeated-measures analysis of variance (ANOVA) followed by the Bonferroni post-test to compare replicate means by row to the control. In the apoptosis assay, each time point was analyzed separately with one-way ANOVA followed by Dunnett’s multiple comparison test. The differences in copy numbers of 18S and DJ sequences were analyzed with one-way ANOVA by comparing the vector-groups’ values to the same donor’s non-transduced cell control with Dunnett’s multiple comparison test. All statistical analysis was done with GraphPad Prism version 5.03 for Windows, GraphPad Software, San Diego, CA USA, <https://www.graphpad.com/>.

### Data Availability

The final IS datasets generated and analyzed in this study are available upon a reasonable request.

### SUPPLEMENTAL INFORMATION

Supplemental Information can be found online at <https://doi.org/10.1016/j.ymthe.2020.05.019>.

### AUTHOR CONTRIBUTIONS

D.S. conceived the study, designed the experiments, conducted cell culture experiments, performed bioinformatics analysis, analyzed the data, and wrote the manuscript. S.A. designed bioinformatics analysis strategy, performed the data analyses, and contributed to writing the analysis method section. A.N. conducted cell culture experiments, performed the integration site extractions, designed and executed the ddPCR assays and performed the analysis, analyzed the data, and participated in writing the manuscript. M.S. and S.Y.-H. supervised and financed the study and edited the manuscript.

### CONFLICTS OF INTEREST

M.S. is co-founder and CEO of GeneWerk GmbH, Heidelberg, Germany.

### ACKNOWLEDGMENTS

This work was supported by the Finnish Academy Centre of Excellence (307402), the European Research Council (GA670951), and by the Eemil Aaltonen Foundation (to D.S.). This work also got support from the National Virus Vector Laboratory/A.I. Virtanen Insti-

tute, University of Eastern Finland, Kuopio, and from the Kuopio Center for Gene and Cell Therapy (KCT). Anssi Kailaanmäki, Elina Koli, Annu Luostarinen and Tanja Kaartinen are acknowledged for their help with T cell extraction and culture-related methods.

### REFERENCES

- Cavazzana, M., Bushman, F.D., Miccio, A., André-Schmutz, I., and Six, E. (2019). Gene therapy targeting haematopoietic stem cells for inherited diseases: progress and challenges. *Nat. Rev. Drug Discov.* 18, 447–462.
- Milone, M.C., and O’Doherty, U. (2018). Clinical use of lentiviral vectors. *Leukemia* 32, 1529–1541.
- Montini, E., Cesana, D., Schmidt, M., Sanvito, F., Ponzoni, M., Bartholomae, C., Sergi, L., Benedicenti, F., Ambrosi, A., Di Serio, C., et al. (2006). Hematopoietic stem cell gene transfer in a tumor-prone mouse model uncovers low genotoxicity of lentiviral vector integration. *Nat. Biotechnol.* 24, 687–696.
- Cavazza, A., Moiani, A., and Mavilio, F. (2013). Mechanisms of retroviral integration and mutagenesis. *Hum. Gene Ther.* 24, 119–131.
- Craigie, R., and Bushman, F.D. (2012). HIV DNA integration. *Cold Spring Harb. Perspect. Med.* 2, a006890.
- Schröder, A.R.W., Shinn, P., Chen, H., Berry, C., Ecker, J.R., and Bushman, F. (2002). HIV-1 integration in the human genome favors active genes and local hotspots. *Cell* 110, 521–529.
- Ciuffi, A., Llano, M., Poeschla, E., Hoffmann, C., Leipzig, J., Shinn, P., Ecker, J.R., and Bushman, F. (2005). A role for LEDGF/p75 in targeting HIV DNA integration. *Nat. Med.* 11, 1287–1289.
- Stults, D.M., Killen, M.W., Pierce, H.H., and Pierce, A.J. (2008). Genomic architecture and inheritance of human ribosomal RNA gene clusters. *Genome Res.* 18, 13–18.
- Schöfer, C., and Weipoltshammer, K. (2018). Nucleolus and chromatin. *Histochem. Cell Biol.* 150, 209–225.
- Scully, R., Panday, A., Elango, R., and Willis, N.A. (2019). DNA double-strand break repair-pathway choice in somatic mammalian cells. *Nat. Rev. Mol. Cell Biol.* 20, 698–714.
- Yamamoto, Y., and Gerbi, S.A. (2018). Making ends meet: targeted integration of DNA fragments by genome editing. *Chromosoma* 127, 405–420.
- Urnov, F.D. (2018). Ctrl-Alt-inDel: genome editing to reprogram a cell in the clinic. *Curr. Opin. Genet. Dev.* 52, 48–56.
- Muscarella, D.E., and Vogt, V.M. (1989). A mobile group I intron in the nuclear rDNA of *Physarum polycephalum*. *Cell* 56, 443–454.
- Ellison, E.L., and Vogt, V.M. (1993). Interaction of the intron-encoded mobility endonuclease I-PpoI with its target site. *Mol. Cell. Biol.* 13, 7531–7539.
- Turkki, V., Schenkwein, D., Timonen, O., Husso, T., Lesch, H.P., and Ylä-Herttuala, S. (2014). Lentiviral protein transduction with genome-modifying HIV-1 integrase-I-PpoI fusion proteins: studies on specificity and cytotoxicity. *BioMed Res. Int.* 2014, 379340.
- Schenkwein, D., Turkki, V., Ahlroth, M.K., Timonen, O., Airene, K.J., and Ylä-Herttuala, S. (2013). rDNA-directed integration by an HIV-1 integrase-I-PpoI fusion protein. *Nucleic Acids Res.* 41, e61.
- Mannino, S.J., Jenkins, C.L., and Raines, R.T. (1999). Chemical mechanism of DNA cleavage by the homing endonuclease I-PpoI. *Biochemistry* 38, 16178–16186.
- Mitchell, R.S., Beitzel, B.F., Schroder, A.R.W., Shinn, P., Chen, H., Berry, C.C., Ecker, J.R., and Bushman, F.D. (2004). Retroviral DNA integration: ASLV, HIV, and MLV show distinct target site preferences. *PLoS Biol.* 2, E234.
- Brady, T., Agosto, L.M., Malani, N., Berry, C.C., O’Doherty, U., and Bushman, F. (2009). HIV integration site distributions in resting and activated CD4+ T cells infected in culture. *AIDS* 23, 1461–1471.
- Smit, A.F.A., Hubley, R., and Green, P. (2015). RepeatMasker Open-4.0, <http://www.repeatmasker.org>.
- Robicheau, B.M., Susko, E., Harrigan, A.M., and Snyder, M. (2017). Ribosomal RNA genes contribute to the formation of pseudogenes and junk DNA in the human genome. *Genome Biol. Evol.* 9, 380–397.

22. Marini, B., Kertesz-Farkas, A., Ali, H., Lucic, B., Lisek, K., Manganaro, L., Pongor, S., Luzzati, R., Recchia, A., Mavilio, F., et al. (2015). Nuclear architecture dictates HIV-1 integration site selection. *Nature* 521, 227–231.
23. Biffi, A., Bartolomeae, C.C., Cesana, D., Cartier, N., Aubourg, P., Ranzani, M., Cesani, M., Benedicenti, F., Plati, T., Rubagotti, E., et al. (2011). Lentiviral vector common integration sites in preclinical models and a clinical trial reflect a benign integration bias and not oncogenic selection. *Blood* 117, 5332–5339.
24. Aiuti, A., Biasco, L., Scaramuzza, S., Ferrua, F., Cicalese, M.P., Baricordi, C., Dionisio, F., Calabria, A., Giannelli, S., Castiello, M.C., et al. (2013). Lentiviral hematopoietic stem cell gene therapy in patients with Wiskott-Aldrich syndrome. *Science* 341, 1233151.
25. Biffi, A., Montini, E., Lorioli, L., Cesani, M., Fumagalli, F., Plati, T., Baldoli, C., Martino, S., Calabria, A., Canale, S., et al. (2013). Lentiviral hematopoietic stem cell gene therapy benefits metachromatic leukodystrophy. *Science* 341, 1233158.
26. Cartier, N., Hacein-Bey-Abina, S., Bartholomeae, C.C., Veres, G., Schmidt, M., Kutschera, I., Vidaud, M., Abel, U., Dal-Cortivo, L., Caccavelli, L., et al. (2009). Hematopoietic stem cell gene therapy with a lentiviral vector in X-linked adrenoleukodystrophy. *Science* 326, 818–823.
27. Németh, A., and Längst, G. (2011). Genome organization in and around the nucleolus. *Trends Genet.* 27, 149–156.
28. Pontvianne, F., Carpentier, M.-C., Durut, N., Pavlišťová, V., Jaške, K., Schořová, Š., Parrinello, H., Rohmer, M., Pikaard, C.S., Fojtová, M., et al. (2016). Identification of Nucleolus-Associated Chromatin Domains Reveals a Role for the Nucleolus in 3D Organization of the A. thaliana Genome. *Cell Rep.* 16, 1574–1587.
29. Yu, S., and Lemos, B. (2018). The long-range interaction map of ribosomal DNA arrays. *PLoS Genet.* 14, e1007258.
30. Németh, A., Conesa, A., Santoyo-Lopez, J., Medina, I., Montaner, D., Péterfia, B., Solové, I., Cremer, T., Dopazo, J., and Längst, G. (2010). Initial genomics of the human nucleolus. *PLoS Genet.* 6, e1000889.
31. Dillinger, S., Straub, T., and Németh, A. (2017). Nucleolus association of chromosomal domains is largely maintained in cellular senescence despite massive nuclear reorganisation. *PLoS ONE* 12, e0178821.
32. van Koningsbruggen, S., Gierlinski, M., Schofield, P., Martin, D., Barton, G.J., Ariyurek, Y., den Dunnen, J.T., and Lamond, A.I. (2010). High-resolution whole-genome sequencing reveals that specific chromatin domains from most human chromosomes associate with nucleoli. *Mol. Biol. Cell* 21, 3735–3748.
33. Yu, S., and Lemos, B. (2016). A Portrait of Ribosomal DNA Contacts with Hi-C Reveals 5S and 45S rDNA Anchoring Points in the Folded Human Genome. *Genome Biol. Evol.* 8, 3545–3558.
34. Diesch, J., Bywater, M.J., Sanij, E., Cameron, D.P., Schierding, W., Brajanovski, N., Son, J., Sornkom, J., Hein, N., Evers, M., et al. (2019). Changes in long-range rDNA-genomic interactions associate with altered RNA polymerase II gene programs during malignant transformation. *Commun. Biol.* 2, 39.
35. Belinky, F., Nativ, N., Stelzer, G., Zimmerman, S., Iny Stein, T., Safran, M., and Lancet, D. (2015). PathCards: multi-source consolidation of human biological pathways. *Database (Oxford)* 2015, 6.
36. Wang, G.P., Ciuffi, A., Leipzig, J., Berry, C.C., and Bushman, F.D. (2007). HIV integration site selection: analysis by massively parallel pyrosequencing reveals association with epigenetic modifications. *Genome Res.* 17, 1186–1194.
37. Kosicki, M., Tomberg, K., and Bradley, A. (2018). Repair of double-strand breaks induced by CRISPR-Cas9 leads to large deletions and complex rearrangements. *Nat. Biotechnol.* 36, 765–771.
38. Cullot, G., Boutin, J., Toutain, J., Prat, F., Pennamen, P., Rooryck, C., Teichmann, M., Rousseau, E., Lamrissi-Garcia, I., Guyonnet-Duperat, V., et al. (2019). CRISPR-Cas9 genome editing induces megabase-scale chromosomal truncations. *Nat. Commun.* 10, 1136.
39. Simeonov, D.R., Brandt, A.J., Chan, A.Y., Cortez, J.T., Li, Z., Woo, J.M., Lee, Y., Carvalho, C.M.B., Indart, A.C., Roth, T.L., et al. (2019). A large CRISPR-induced bystander mutation causes immune dysregulation. *Commun. Biol.* 2, 70.
40. Xu, S., Kim, J., Tang, Q., Chen, Q., Liu, J., Xu, Y., and Fu, X. (2020). CAS9 is a genome mutator by directly disrupting DNA-PK dependent DNA repair pathway. *Protein Cell* 11, 352–365.
41. Stults, D.M., Killen, M.W., Williamson, E.P., Hourigan, J.S., Vargas, H.D., Arnold, S.M., Moscow, J.A., and Pierce, A.J. (2009). Human rRNA gene clusters are recombinational hotspots in cancer. *Cancer Res.* 69, 9096–9104.
42. Gibbons, J.G., Branco, A.T., Godinho, S.A., Yu, S., and Lemos, B. (2015). Concerted copy number variation balances ribosomal DNA dosage in human and mouse genomes. *Proc. Natl. Acad. Sci. USA* 112, 2485–2490.
43. Xu, B., Li, H., Perry, J.M., Singh, V.P., Unruh, J., Yu, Z., Zakari, M., McDowell, W., Li, L., and Gerton, J.L. (2017). Ribosomal DNA copy number loss and sequence variation in cancer. *PLoS Genet.* 13, e1006771.
44. Killen, M.W., Stults, D.M., Adachi, N., Hanakahi, L., and Pierce, A.J. (2009). Loss of Bloom syndrome protein destabilizes human gene cluster architecture. *Hum. Mol. Genet.* 18, 3417–3428.
45. Floutsakou, I., Agrawal, S., Nguyen, T.T., Seoighe, C., Ganley, A.R.D., and McStay, B. (2013). The shared genomic architecture of human nucleolar organizer regions. *Genome Res.* 23, 2003–2012.
46. Lisowski, L., Lau, A., Wang, Z., Zhang, Y., Zhang, F., Grompe, M., and Kay, M.A. (2012). Ribosomal DNA integrating rAAV-rDNA vectors allow for stable transgene expression. *Mol. Ther.* 20, 1912–1923.
47. Wang, Z., Lisowski, L., Finegold, M.J., Nakai, H., Kay, M.A., and Grompe, M. (2012). AAV vectors containing rDNA homology display increased chromosomal integration and transgene persistence. *Mol. Ther.* 20, 1902–1911.
48. Wang, Y., Zhao, J., Duan, N., Liu, W., Zhang, Y., Zhou, M., Hu, Z., Feng, M., Liu, X., Wu, L., et al. (2018). Paired CRISPR/Cas9 Nickases Mediate Efficient Site-Specific Integration of F9 into rDNA Locus of Mouse ESCs. *Int. J. Mol. Sci.* 19, 3035.
49. Liu, B., Chen, F., Wu, Y., Wang, X., Feng, M., Li, Z., Zhou, M., Wang, Y., Wu, L., Liu, X., and Liang, D. (2017). Enhanced tumor growth inhibition by mesenchymal stem cells derived from iPSCs with targeted integration of interleukin24 into rDNA loci. *Oncotarget* 8, 40791–40803.
50. Basu, A.S. (2017). Digital Assays Part I: Partitioning Statistics and Digital PCR. *SLAS Technol.* 22, 369–386.
51. Quan, P.L., Sauzade, M., and Brouzes, E. (2018). DPCR: A technology review. *Sensors (Basel)* 18, 1271.
52. Larsen, D.H., and Stucki, M. (2016). Nucleolar responses to DNA double-strand breaks. *Nucleic Acids Res.* 44, 538–544.
53. Bushman, F.D. (1994). Tethering human immunodeficiency virus 1 integrase to a DNA site directs integration to nearby sequences. *Proc. Natl. Acad. Sci. USA* 91, 9233–9237.
54. Meehan, A.M., Saenz, D.T., Morrison, J.H., Garcia-Rivera, J.A., Peretz, M., Llano, M., and Poeschla, E.M. (2009). LEDGF/p75 proteins with alternative chromatin tethers are functional HIV-1 cofactors. *PLoS Pathog.* 5, e1000522.
55. Silvers, R.M., Smith, J.A., Schowalter, M., Litwin, S., Liang, Z., Geary, K., and Daniel, R. (2010). Modification of integration site preferences of an HIV-1-based vector by expression of a novel synthetic protein. *Hum. Gene Ther.* 21, 337–349.
56. Gijbsers, R., Ronen, K., Vets, S., Malani, N., De Rijck, J., McNeely, M., Bushman, F.D., and Debyser, Z. (2010). LEDGF hybrids efficiently retarget lentiviral integration into heterochromatin. *Mol. Ther.* 18, 552–560.
57. Ferris, A.L., Wu, X., Hughes, C.M., Stewart, C., Smith, S.J., Milne, T.A., Wang, G.G., Shun, M.C., Allis, C.D., Engelman, A., and Hughes, S.H. (2010). Lens epithelium-derived growth factor fusion proteins redirect HIV-1 DNA integration. *Proc. Natl. Acad. Sci. USA* 107, 3135–3140.
58. Schenkwein, D., Turkki, V., Kärkkäinen, H.-R., Airene, K., and Ylä-Herttuala, S. (2010). Production of HIV-1 integrase fusion protein-carrying lentiviral vectors for gene therapy and protein transduction. *Hum. Gene Ther.* 21, 589–602.
59. Voelkel, C., Galla, M., Maetzig, T., Warlich, E., Kuehle, J., Zychlinski, D., Bode, J., Cantz, T., Schambach, A., and Baum, C. (2010). Protein transduction from retroviral Gag precursors. *Proc. Natl. Acad. Sci. USA* 107, 7805–7810.
60. He, C., Gouble, A., Bourdel, A., Manchev, V., Poirot, L., Paques, F., Duchateau, P., Edelman, A., and Danos, O. (2014). Lentiviral protein delivery of meganucleases in human cells mediates gene targeting and alleviates toxicity. *Gene Ther.* 21, 759–766.
61. Uhlig, K.M., Schülke, S., Scheuplein, V.A.M., Malczyk, A.H., Reusch, J., Kugelman, S., Muth, A., Koch, V., Hutzler, S., Bodmer, B.S., et al. (2015). Lentiviral Protein



- Transfer Vectors Are an Efficient Vaccine Platform and Induce a Strong Antigen-Specific Cytotoxic T Cell Response. *J. Virol.* 89, 9044–9060.
62. Choi, J.G., Dang, Y., Abraham, S., Ma, H., Zhang, J., Guo, H., Cai, Y., Mikkelsen, J.G., Wu, H., Shankar, P., and Manjunath, N. (2016). Lentivirus pre-packed with Cas9 protein for safer gene editing. *Gene Ther.* 23, 627–633.
  63. Prel, A., Caval, V., Gayon, R., Ravassard, P., Duthoit, C., Payen, E., Maouche-Chretien, L., Creneguy, A., Nguyen, T.H., Martin, N., et al. (2015). Highly efficient in vitro and in vivo delivery of functional RNAs using new versatile MS2-chimeric retrovirus-like particles. *Mol. Ther. Methods Clin. Dev.* 2, 15039.
  64. Cai, Y., Bak, R.O., Krogh, L.B., Staunstrup, N.H., Moldt, B., Corydon, T.J., Schröder, L.D., and Mikkelsen, J.G. (2014). DNA transposition by protein transduction of the piggyBac transposase from lentiviral Gag precursors. *Nucleic Acids Res.* 42, e28.
  65. Cai, Y., Bak, R.O., and Mikkelsen, J.G. (2014). Targeted genome editing by lentiviral protein transduction of zinc-finger and TAL-effector nucleases. *eLife* 3, e01911.
  66. Skipper, K.A., Nielsen, M.G., Andersen, S., Ryo, L.B., Bak, R.O., and Mikkelsen, J.G. (2018). Time-Restricted PiggyBac DNA Transposition by Transposase Protein Delivery Using Lentivirus-Derived Nanoparticles. *Mol. Ther. Nucleic Acids* 11, 253–262.
  67. Lyu, P., Javidi-Parsijani, P., Atala, A., and Lu, B. (2019). Delivering Cas9/sgRNA ribonucleoprotein (RNP) by lentiviral capsid-based bionanoparticles for efficient 'hit-and-run' genome editing. *Nucleic Acids Res.* 47, e99.
  68. Mangeot, P.E., Risson, V., Fusil, F., Marnef, A., Laurent, E., Blin, J., Mournetas, V., Massouridès, E., Sohier, T.J.M., Corbin, A., et al. (2019). Genome editing in primary cells and in vivo using viral-derived Nanoblades loaded with Cas9-sgRNA ribonucleoproteins. *Nat. Commun.* 10, 45.
  69. Chen, X., and Gonçalves, M.A.F.V. (2016). Engineered viruses as genome editing devices. *Mol. Ther.* 24, 447–457.
  70. Mock, U., Riecken, K., Berdien, B., Qasim, W., Chan, E., Cathomen, T., and Fehse, B. (2014). Novel lentiviral vectors with mutated reverse transcriptase for mRNA delivery of TALE nucleases. *Sci. Rep.* 4, 6409.
  71. Knopp, Y., Geis, F.K., Heckl, D., Horn, S., Neumann, T., Kuehle, J., Meyer, J., Fehse, B., Baum, C., Morgan, M., et al. (2018). Transient Retrovirus-Based CRISPR/Cas9 All-in-One Particles for Efficient, Targeted Gene Knockout. *Mol. Ther. Nucleic Acids* 13, 256–274.
  72. Lu, B., Javidi-Parsijani, P., Makani, V., Mehraein-Ghomi, F., Sarhan, W.M., Sun, D., Yoo, K.W., Atala, Z.P., Lyu, P., and Atala, A. (2019). Delivering SaCas9 mRNA by lentivirus-like bionanoparticles for transient expression and efficient genome editing. *Nucleic Acids Res.* 47, e44.
  73. Broeders, M., Herrero-Hernandez, P., Ernst, M.P.T., van der Ploeg, A.T., and Pijnappel, W.W.M.P. (2020). Sharpening the Molecular Scissors: Advances in Gene-Editing Technology. *iScience* 23, 100789.
  74. Kuroki-Kami, A., Nichuguti, N., Yatabe, H., Mizuno, S., Kawamura, S., and Fujiwara, H. (2019). Targeted gene knockin in zebrafish using the 28S rDNA-specific non-LTR-retrotransposon R2OL. *Mob. DNA* 10, 23.
  75. Johansen, S.D., Haugen, P., and Nielsen, H. (2007). Expression of protein-coding genes embedded in ribosomal DNA. *Biol. Chem.* 388, 679–686.
  76. Bierhoff, H., Schmitz, K., Maass, F., Ye, J., and Grummt, I. (2010). Noncoding transcripts in sense and antisense orientation regulate the epigenetic state of ribosomal RNA genes. *Cold Spring Harb. Symp. Quant. Biol.* 75, 357–364.
  77. Bierhoff, H., Dammert, M.A., Brocks, D., Dambacher, S., Schotta, G., and Grummt, I. (2014). Quiescence-induced LncRNAs trigger H4K20 trimethylation and transcriptional silencing. *Mol. Cell* 54, 675–682.
  78. Follenzi, A., and Naldini, L. (2002). Generation of HIV-1 derived lentiviral vectors. *Methods Enzymol.* 346, 454–465.
  79. Brady, T., Roth, S.L., Malani, N., Wang, G.P., Berry, C.C., Leboulch, P., Hacein-Bey-Abina, S., Cavazzana-Calvo, M., Papapetrou, E.P., Sadelain, M., et al. (2011). A method to sequence and quantify DNA integration for monitoring outcome in gene therapy. *Nucleic Acids Res.* 39, e72.
  80. Jiang, H., Lei, R., Ding, S.W., and Zhu, S. (2014). Skewer: a fast and accurate adapter trimmer for next-generation sequencing paired-end reads. *BMC Bioinformatics* 15, 182.
  81. Kent, W.J. (2002). BLAT—the BLAST-like alignment tool. *Genome Res.* 12, 656–664.
  82. Karolchik, D., Hinrichs, A.S., Furey, T.S., Roskin, K.M., Sugnet, C.W., Haussler, D., and Kent, W.J. (2004). The UCSC Table Browser data retrieval tool. *Nucleic Acids Res.* 32, D493–D496.
  83. Quinlan, A.R., and Hall, I.M. (2010). BEDTools: a flexible suite of utilities for comparing genomic features. *Bioinformatics* 26, 841–842.
  84. Gel, B., and Serra, E. (2017). KaryoploteR: An R/Bioconductor package to plot customizable genomes displaying arbitrary data. *Bioinformatics* 33, 3088–3090.
  85. Gel, B., Diez-Villanueva, A., Serra, E., Buschbeck, M., Peinado, M.A., and Malinverni, R. (2016). regioneR: an R/Bioconductor package for the association analysis of genomic regions based on permutation tests. *Bioinformatics* 32, 289–291.
  86. Fronza, R., Vasciaveo, A., Benso, A., and Schmidt, M. (2015). A Graph Based Framework to Model Virus Integration Sites. *Comput. Struct. Biotechnol. J.* 14, 69–77.
  87. Vasciaveo, A., Velevska, I., Politano, G., Savino, A., Schmidt, M., and Fronza, R. (2015). Common integration sites of published datasets identified using a graph-based framework. *Comput. Struct. Biotechnol. J.* 14, 87–90.
  88. Zhou, Y., Zhou, B., Pache, L., Chang, M., Khodabakhshi, A.H., Tanaseichuk, O., Benner, C., and Chanda, S.K. (2019). Metascape provides a biologist-oriented resource for the analysis of systems-level datasets. *Nat. Commun.* 10, 1523.
  89. Hinrichs, A.S., Karolchik, D., Baertsch, R., Barber, G.P., Bejerano, G., Clawson, H., Diekhans, M., Furey, T.S., Harte, R.A., Hsu, F., et al. (2006). The UCSC Genome Browser Database: update 2006. *Nucleic Acids Res.* 34, D590–D598.



**YMTHE, Volume 28**

**Supplemental Information**

**Efficient Nuclease-Directed  
Integration of Lentivirus Vectors  
into the Human Ribosomal DNA Locus**

**Diana Schenkwein, Saira Afzal, Alisa Nousiainen, Manfred Schmidt, and Seppo Ylä-  
Herttuala**

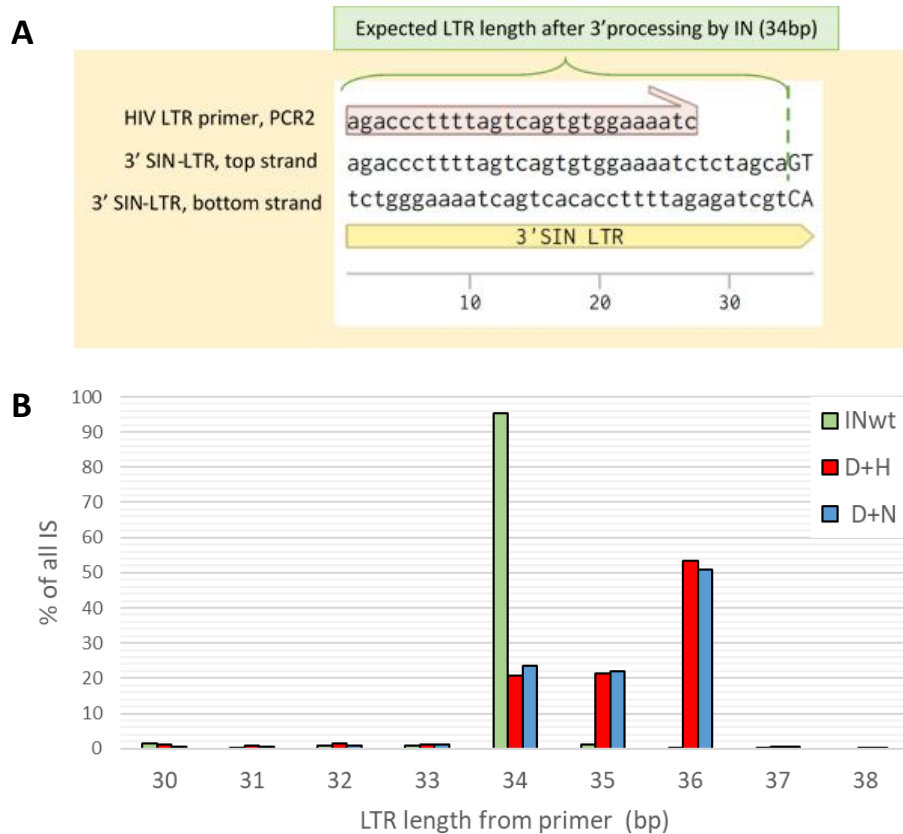

**Figure S1: An illustration of the 3'LTR and analysis of LTR length in the different vector groups. A)** An illustration of the 3'LTR present in the sequencing reads. The nested primer used in integration site extraction is shown on the top of the image. After IN-catalyzed processing of the LTRs and subsequent integration, the LTRs are expected to lack the terminal 3'GT-dinucleotide. After NHEJ-driven integration of the vector cDNA, the GT dinucleotide is frequently present. Vector integration after DNA repair through NHEJ is often accompanied with small insertions and deletions (indel mutations) at the cleaved site and at the termini of the inserted molecule, which can result in shorter and longer LTRs than expected. **B)** The proportions of LTRs with different lengths in the complete IS data of the three LV groups. LTR, long terminal repeat; SIN, self-inactivating LTR.

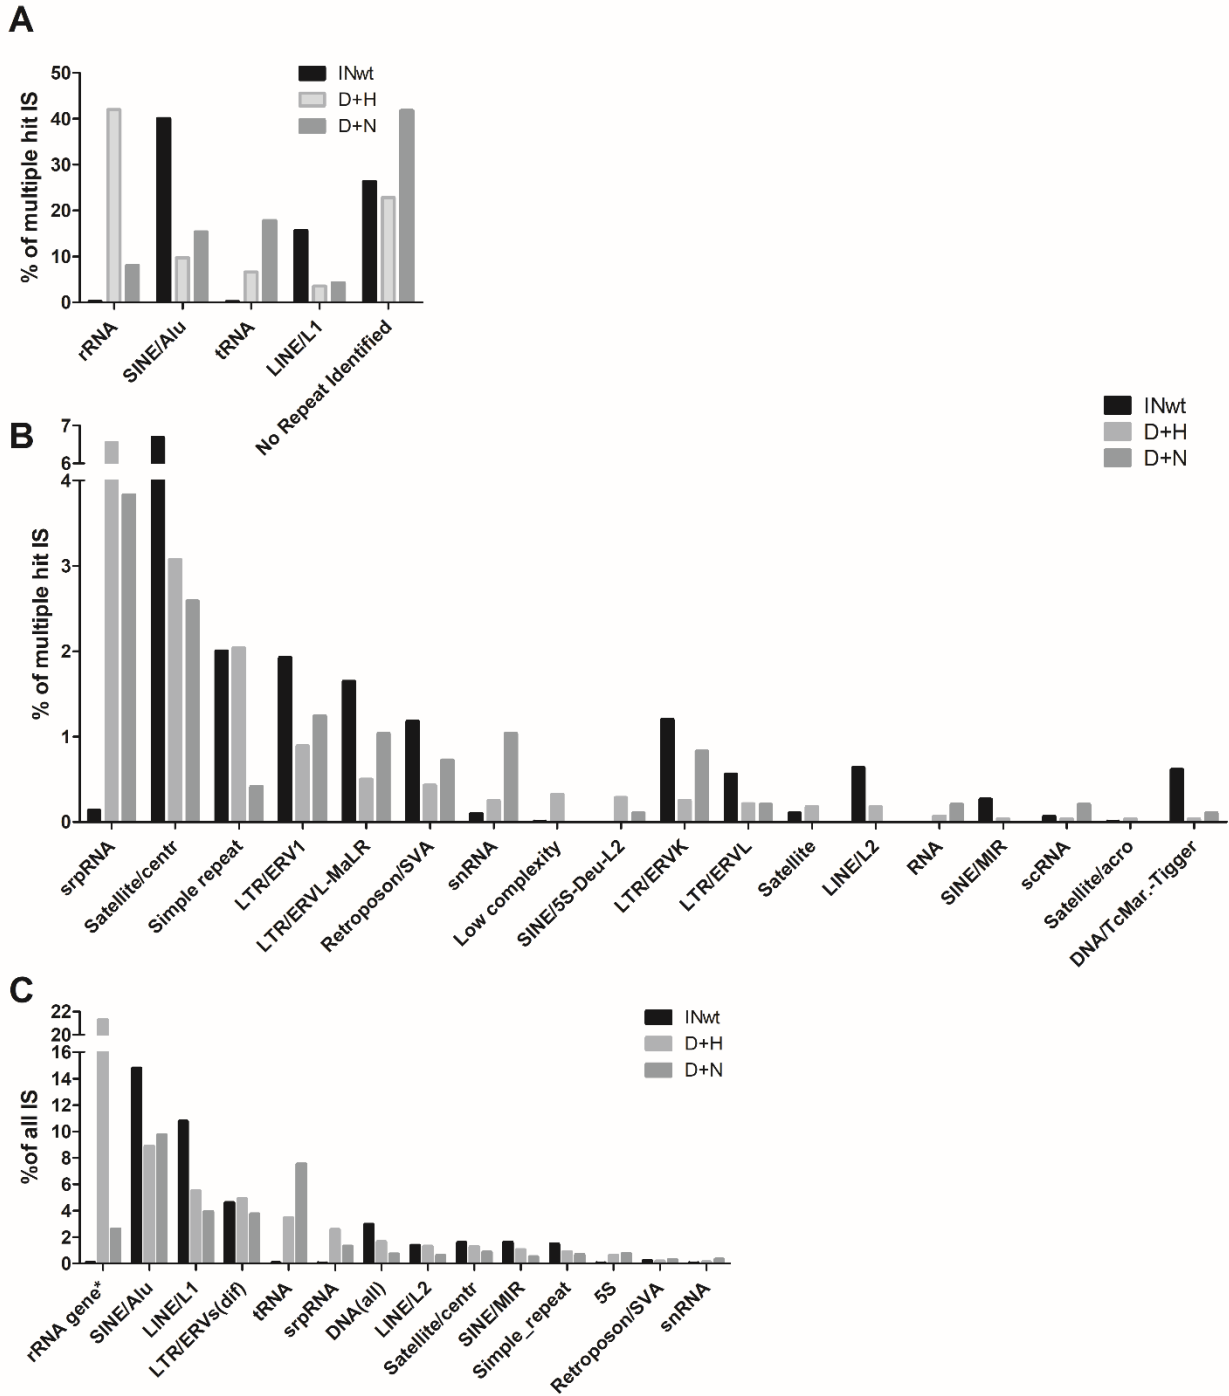

**Figure S2: Localization of multiple hit (MH)-integration sites in different repeat classes and the frequency of integration into different repeats in the total IS data.** **A:** Integration frequency in different repeat types in the MH-IS data (high frequency integration); **B:** Integration frequency in different repeat types of the MH-IS data (low frequency integration). **C:** Integration frequency within different repeat types in the total IS data of the LVs. In A and B the repeat identification and annotations from RepeatMasker were used. In C, rRNA gene repeats were annotated manually (marked with \*) due to the inability of the RepeatMasker to identify other rRNA gene features than the genes encoding for the molecules incorporated into mature ribosomes (See Figure 1 for pre-rRNA gene composition).

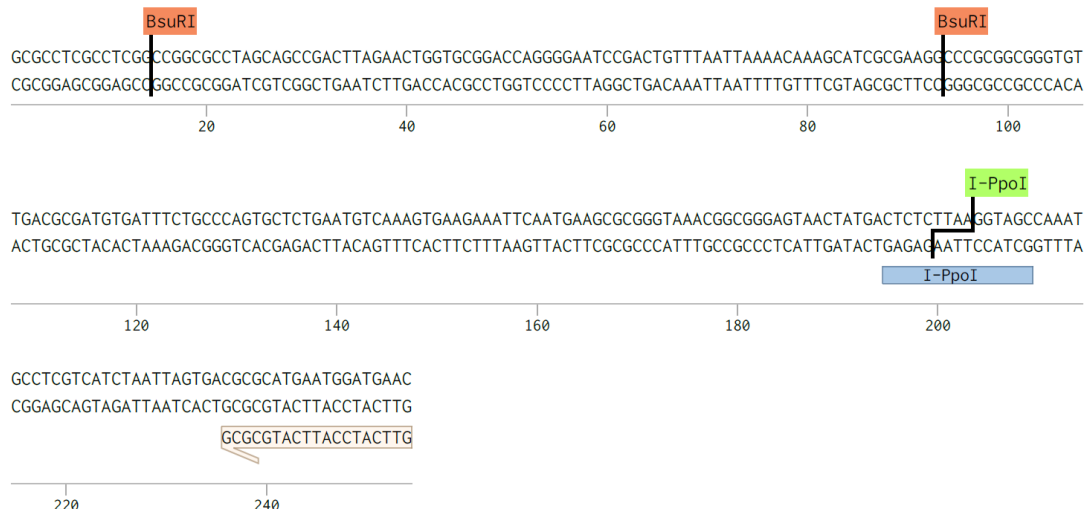

**Figure S3: Illustration of the genomic region where targeted integration was detected with ddPCR.** The I-PpoI site on chromosome 21 (Chr21:8444914-8444917) is shown with a green label and a blue box, and the primer annealing 32 bp downstream of the I-PpoI site is visible on the lowest sequence row. The cleavage sites for the BsuRI restriction enzyme, used to digest the genomic DNA prior to ddPCR, are shown. The length of the genomic region shown corresponds to the maximum length of the ddPCR product based on the extension time of the program.

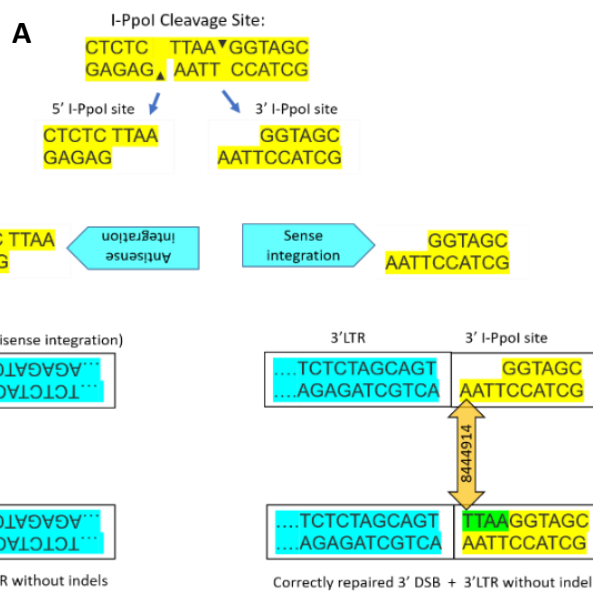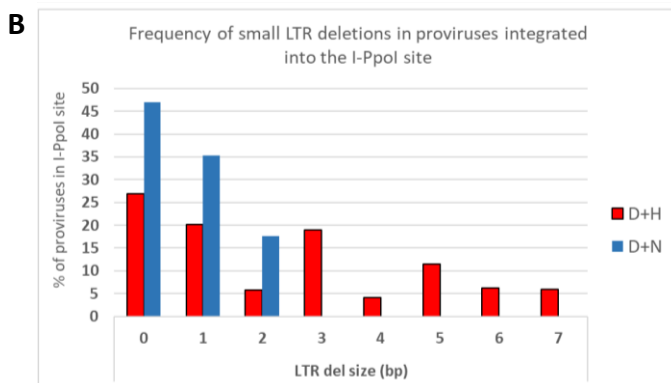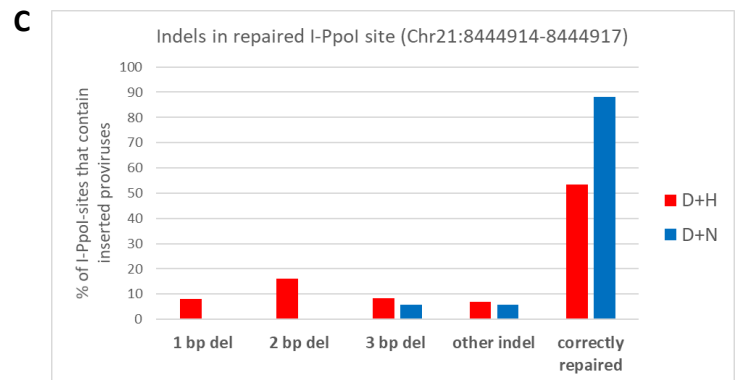

**Figure S4: Characterization of indels in proviruses inserted into the cleaved I-PpoI site on chromosome 21 (Chr21:8444914-8444917)** **A)** An illustration of provirus integration into the cleaved I-PpoI site with the genomic coordinates of the cleaved and repaired I-PpoI site nucleotides shown (orange arrows). The sequence of the unprocessed 3'LTR without deletions is highlighted with turquoise. **B)** Frequency of small deletions in the 3' LTRs of the inserted proviruses, where processing of the 3'GT dinucleotide by IN is not expected. **C)** Characterization of the I-PpoI site after vector insertion into the site. After error-free repair of the 5' or 3' I-PpoI sites the genomic sequence after the provirus matches exactly the nucleotides highlighted in yellow and green at the bottom of A.

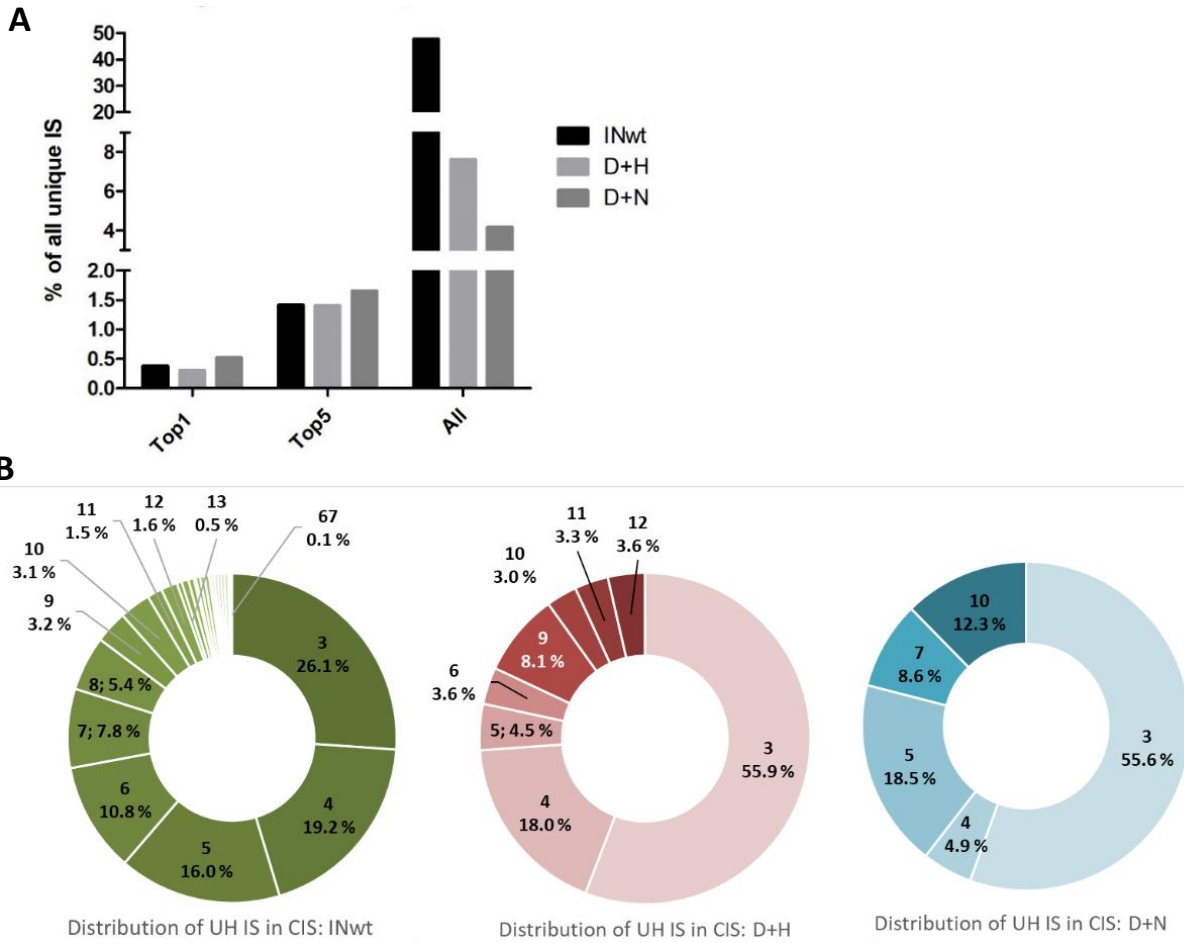

**Figure S5: Characterization of integration site localization into common insertion sites (CIS).** **A)** The proportion of CIS-associated IS of all unique IS in the strongest identified hotspot (Top1), in the five most targeted hotspots (Top5) and from all unique IS (All). **B)** Distribution of unique IS into CIS of different orders. The number shown above the percentage value is the CIS order (strength) that equals the number of IS within a CIS. For INwt LVs, CIS of the orders 14 to 66 are not shown for clarity. The percentages denote the fraction of all IS within CIS of the specified order of all CIS-associated IS.



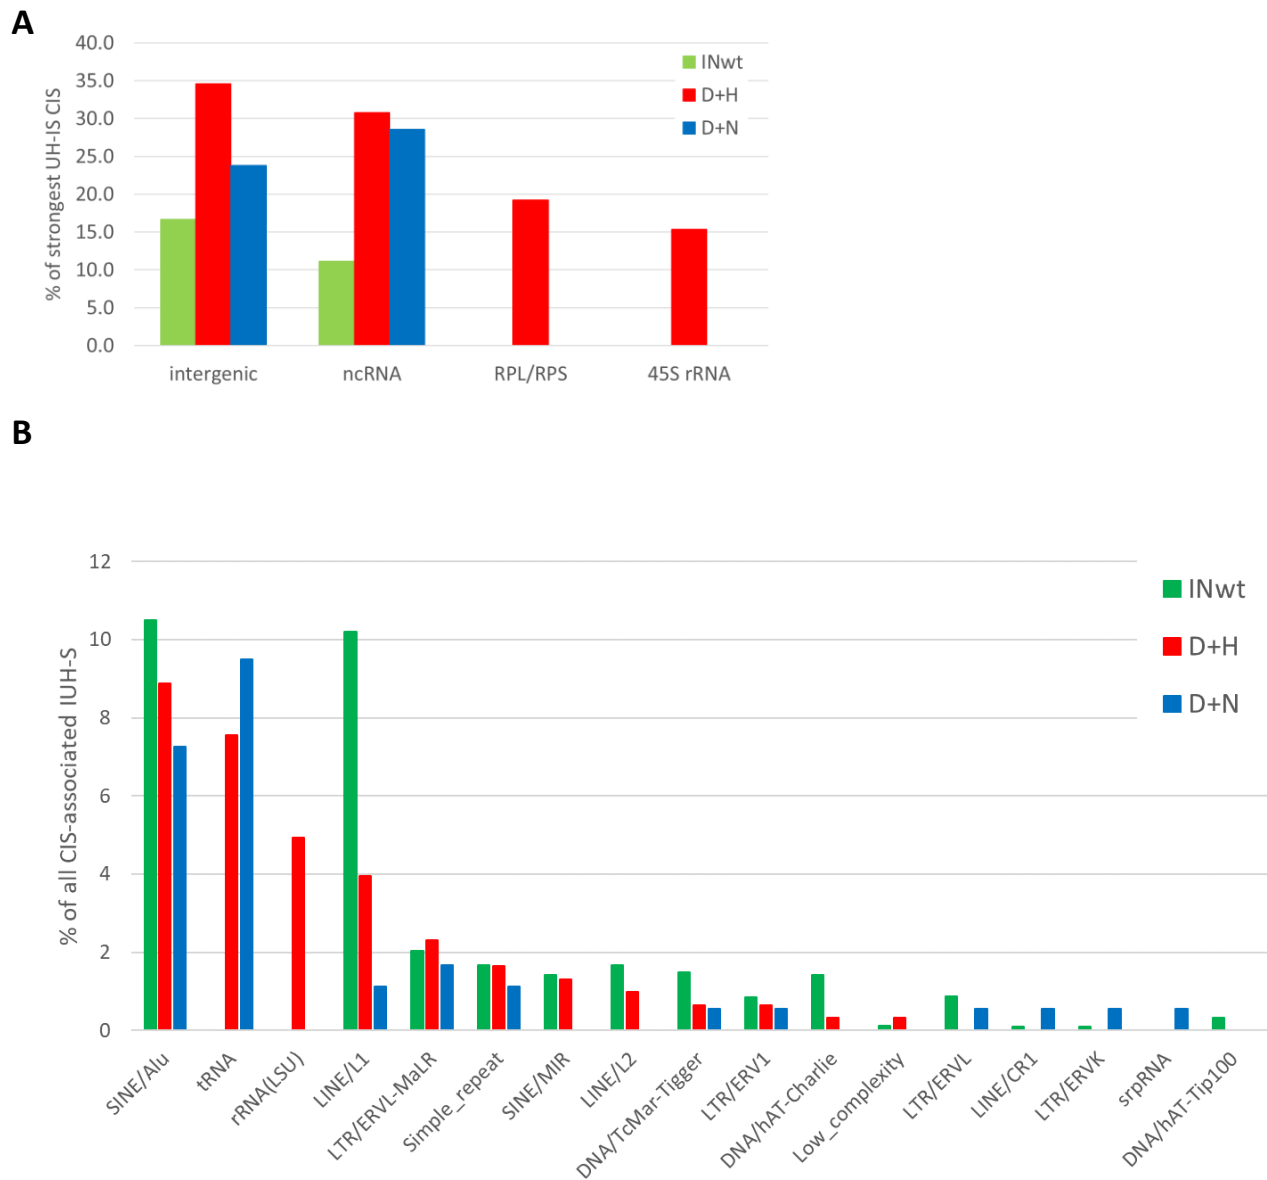

**Figure S6: Characterization of the differences in preferential integration target site selection between LVs containing the D+H fusion protein, the D+N fusion protein or INwt. A)** The proportion of selected features present in the ~15 most targeted integration hotspots among the unique IS (UH-IS) (Table 1) of the different LVs. **B)** The proportion of different repeat types present in CIS-associated unique IS reads. The numbers of CIS-contained IS are: 8450 for LV INwt; 333 for LV D+H and 81 for LV D+N. CIS: common integration site; LSU: ribosome large subunit -contained rRNA (28S rRNA gene).

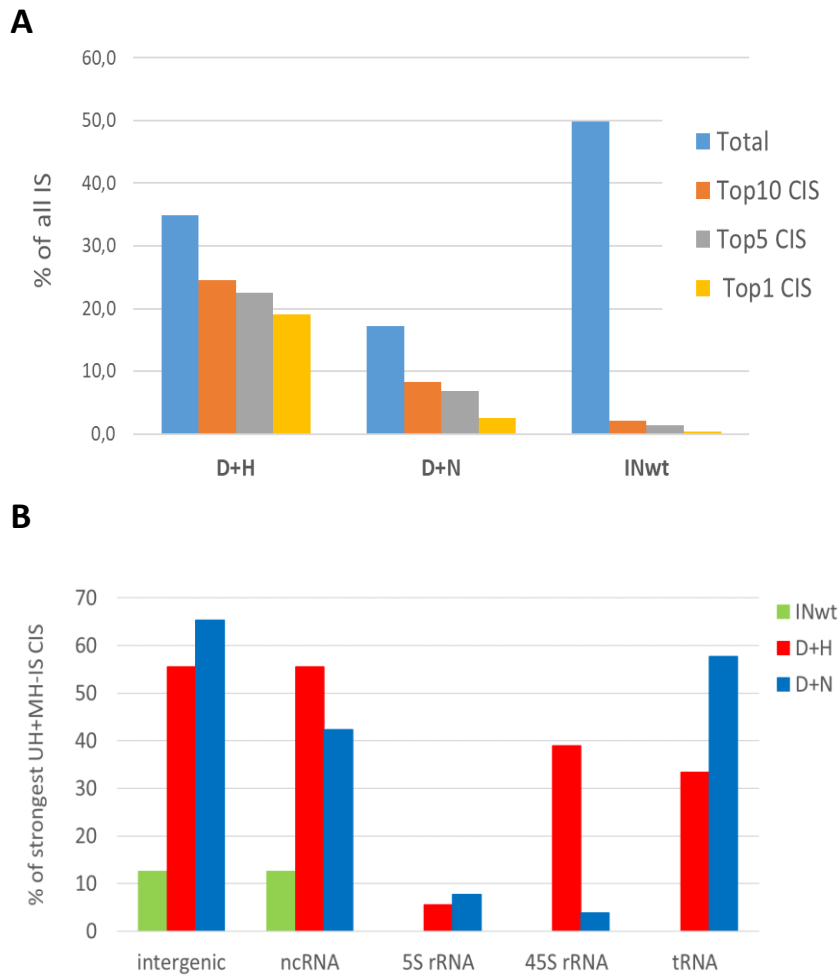

**Figure S7: Characterization of the tendency of different LVs to form integration hotspots when both unique and multiple hit integration sites (UH and MH IS, respectively) are considered, and the differences between LVs in targeting specific features for integration. A)** The proportion of CIS-associated IS of all IS in the strongest identified hotspot (Top1 CIS), in the ten, five or first most targeted hotspots (Top10 CIS, Top5 CIS and Top1 CIS, respectively) and from all IS (Total). **B)** The proportion of selected features present in the ~15 most targeted integration hotspots analyzed from the complete IS data of the different LVs (Table 2). The numbers of CIS-associated IS are 2506 for LV D+H; 498 for LV D+N and 10367 for LV INwt.

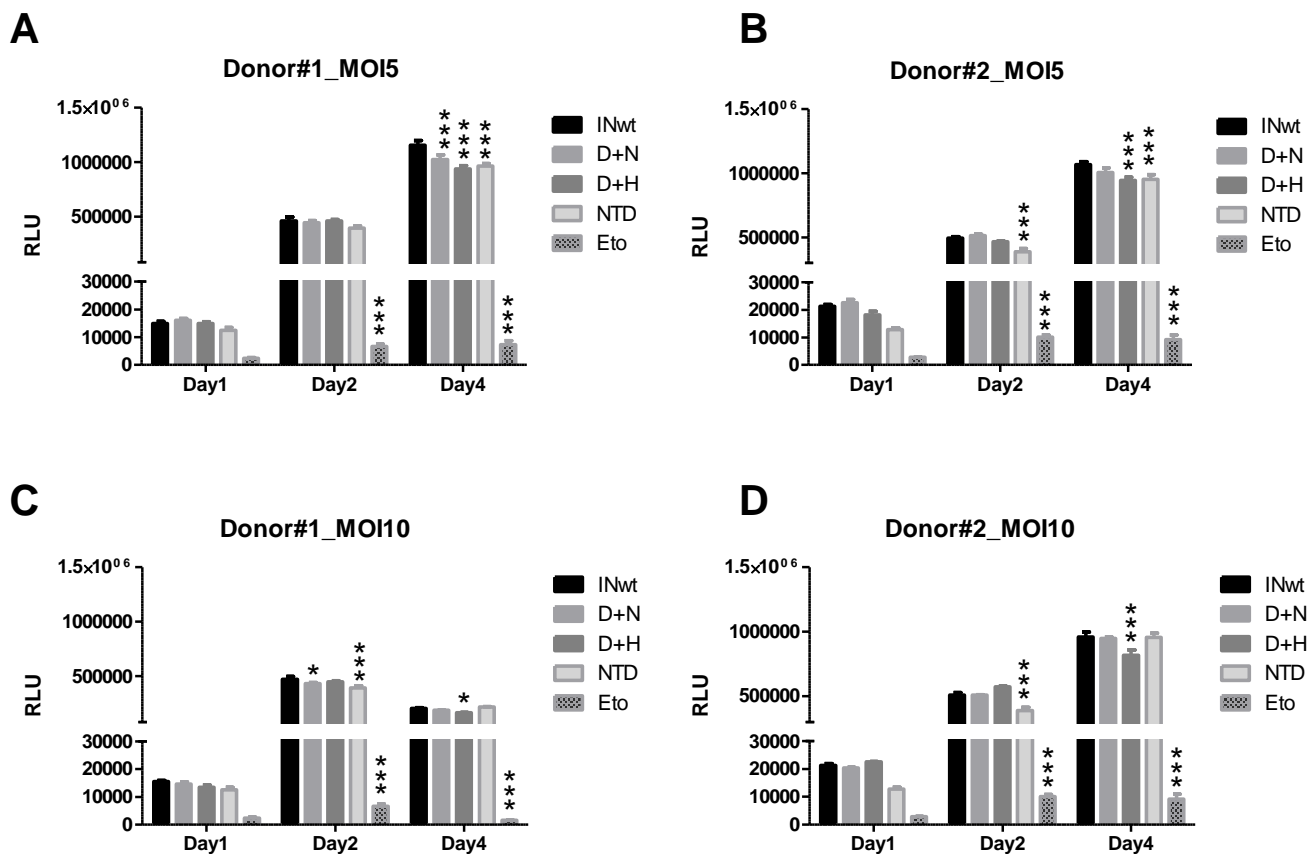

**Figure S8: Viability of primary human T cells transduced with different LVs at days one to four post transduction.** A) and B): viability of T cells extracted from donors 1 (A) and 2 (B) transduced with 5k vp/cell. C) and D): viability of T cells extracted from donors 1 (C) and 2 (D) transduced with 10k vp/cell. All statistical comparisons were done by comparing other groups to the INwt control. \*:p<0.05; \*\*\*:p<0.001; RLU: relative light unit; Eto: etoposide; NTD: non-transduced cells. The RLU values represent means (with SEM) of measurements from triplicate wells.

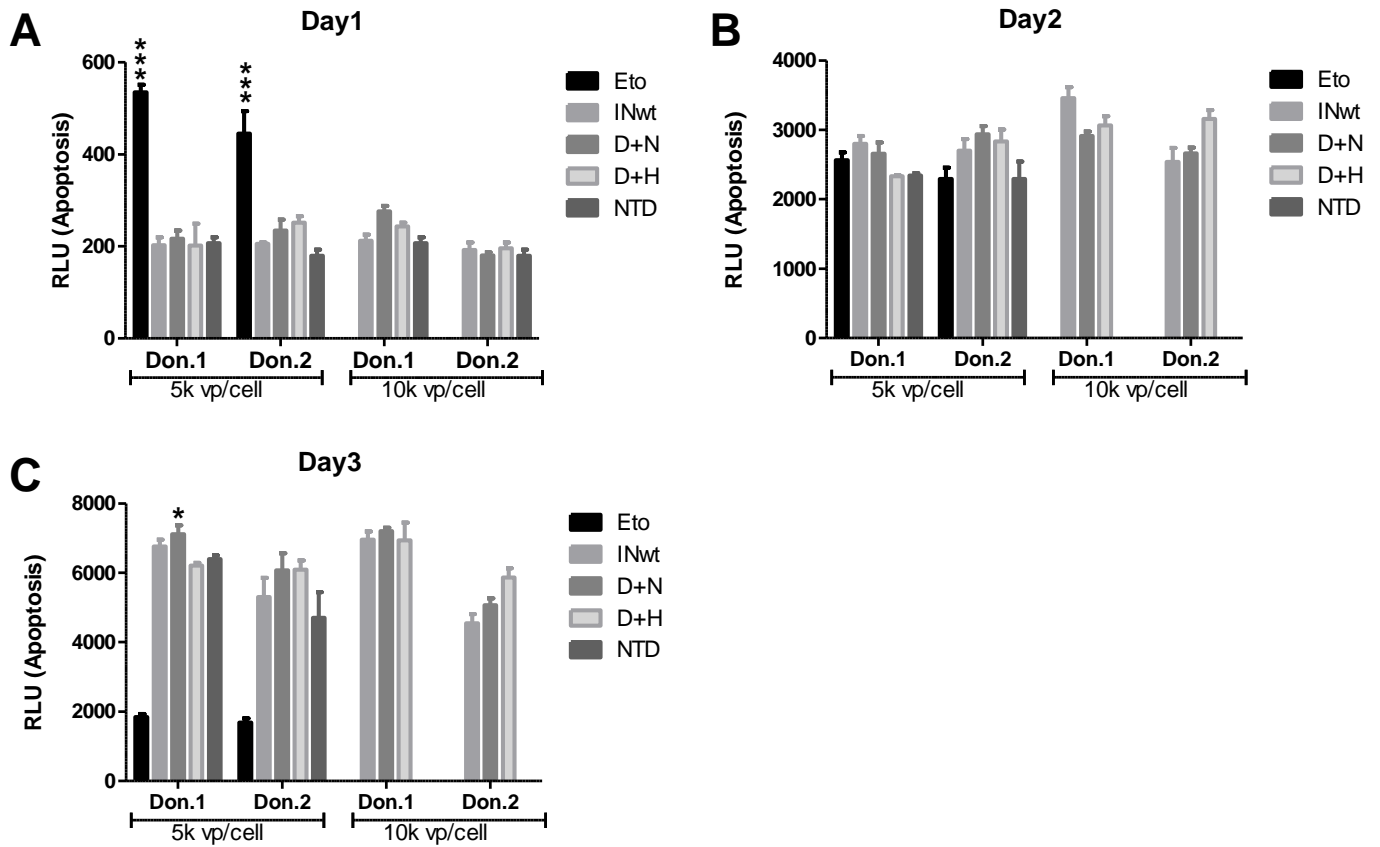

**Figure S9: Measurement of apoptosis in primary human T cells transduced with different LVs.** Apoptotic cells were detected at days one (A), two (B) and three (C) post transduction from primary T cells transduced with 5k and 10k vp/cell (shown below the X-axis). All vector-transduced cells were compared to the non-transduced control (NTD) analyzing each time point separately. \*:p<0.05; \*\*\*:p<0.001; RLU: relative light unit; Eto: etoposide; NTD: non-transduced cells; vp: vector particle; Don: donor. The RLU values represent means (with SEM) of measurements from triplicate wells.

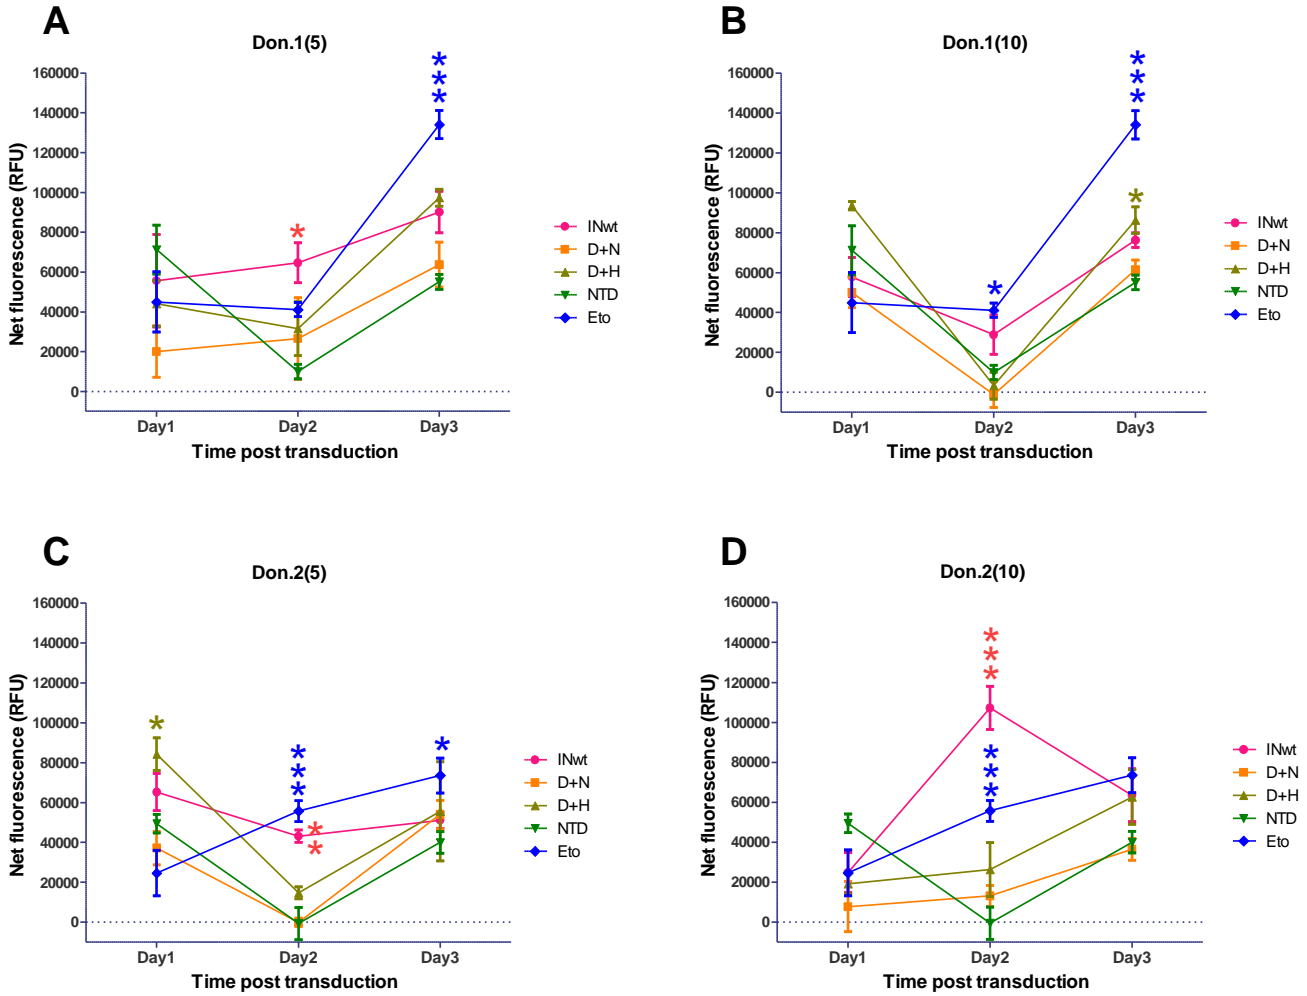

**Figure S10: Measurement of necrosis at days one to three post transduction in primary human T cells transduced with different LVs.** A: Detection of necrotic cells in donor 1-derived T cells transduced with 5k vector particles (vp) per cell. B: Detection of necrotic cells in donor 1-derived T cells transduced with 10k vp/cell. C: Detection of necrotic cells in donor 2-derived T cells transduced with 5k vp/cell. D: Detection of necrotic cells in donor 2-derived T cells transduced with 10k vp/cell. All vector groups were compared to the non-transduced (NTD) cell control. \*:p<0.05; \*\*:p<0.01; \*\*\*:p<0.001; RFU: relative fluorescence unit; Eto: etoposide; NTD: non-transduced cells; Don., donor. The values shown represent means (with SEM) of net fluorescence from triplicate wells per vector group.



**Table S1:** Full 15 bp I-PpoI recognition and cleavage sites in the human genome (Dec. 2013 GRCh38/hg38).

i: intron e: exon. LSU: large subunit of the ribosome that contains the 28S rRNA.

| Chr | Locus                        | Gene            | i/e        | strand      | Repeat          | Nearest gene                  |
|-----|------------------------------|-----------------|------------|-------------|-----------------|-------------------------------|
| 1   | chr1:57987624-57987610       | DAB1            | i1         | minus       | na              |                               |
| 1   | chr1:237603118-237603132     | RVR2            | i35        | plus        | LSU rRNA        |                               |
| 2   | chr2:132279870-132279856     | intergenic      |            | minus       | LSU rRNA        | ANKRD30BL                     |
| 3   | chr3:56330051-56330037       | ERC2            | i2         | minus       | na              |                               |
| 7   | chr7:69062508-69062522       | intergenic      |            | plus        | LSU rRNA        | LOC100507468                  |
| 8   | chr8:69690276-69690262       | SLCO5A1         | i6         | minus       | LSU rRNA        |                               |
| 11  | chr11:77886539-77886553      | INTS4/AAMDC     | i21/i4,5,6 | plus        | LSU rRNA        |                               |
| 20  | chr20:30512873-30512859      | intergenic      |            | minus       | LSU rRNA        | MLLT10P1 (/5.8S rRNA/ FRG1BP) |
| 21  | <b>chr21:8217639-8217653</b> | <b>RNA28SN2</b> | <b>e1</b>  | <b>plus</b> | <b>LSU rRNA</b> |                               |
| 21  | <b>chr21:8400677-8400691</b> | <b>RNA28SN3</b> | <b>e1</b>  | <b>plus</b> | <b>LSU rRNA</b> |                               |
| 21  | <b>chr21:8444909-8444923</b> | <b>RNA28SN1</b> | <b>e1</b>  | <b>plus</b> | <b>LSU rRNA</b> |                               |
| X   | chrX:109054229-109054243     | intergenic      |            | plus        | LSU rRNA        | MIR6087                       |

**Table S2:** Details of the starting material used for integration site sequencing.

| LV   | Integrase content in LV                        | MOI | % EGFP+ cells* | Sampling time point (days post td.) | ng of gDNA in MuA rxn | Linker # | MID # |
|------|------------------------------------------------|-----|----------------|-------------------------------------|-----------------------|----------|-------|
| D+H  | IN <sub>D64V</sub> +IN-I-PpoI <sub>H78A</sub>  | 4   | 93,05          | 2                                   | 242,34                | 4        | 13    |
|      |                                                |     |                | 2                                   | 198                   | 6        | 14    |
| D+N  | IN <sub>D64V</sub> +IN-I-PpoI <sub>N119A</sub> | 4   | 97,02          | 3                                   | 129,78                | 7        | 15    |
|      |                                                |     |                | 3                                   | 247,02                | 8        | 16    |
| INwt | INwt                                           | 1   | 82,93          | 3                                   | 238,74                | 9        | 17    |
|      |                                                |     |                | 3                                   | 163,98                | 10       | 18    |

LV: lentivirus vector; IN: integrase; td: transduction; gDNA: genomic DNA; rxn: reaction; MID: molecular identifier; MOI: multiplicity of infection.\*: EGFP expression measured with flow cytometry from triplicate wells at the day of gDNA extraction.

**Table S3:** Localization of integration sites with respect oncogenes and their upstream and downstream regions.

|             | UH IS in or near oncogenes (% of all IS) | Intragenic IS                     |                          | Intergenic IS                      |                                         |                                           | Med. oncogene Length. Kb |
|-------------|------------------------------------------|-----------------------------------|--------------------------|------------------------------------|-----------------------------------------|-------------------------------------------|--------------------------|
|             |                                          | IS within oncogenes (% of all IS) | Median dist. to TSS (kb) | % of interg. IS upstream of Oncog. | Median dist. (kb) to TSS of upstream IS | Median dist. (kb) to TSS of downstream IS |                          |
| <b>INwt</b> | 15,8                                     | 13,2                              | 55,4                     | 57,2                               | 52,0                                    | 40,6                                      | 123,0                    |
| <b>D+H</b>  | 10,4                                     | 8,1                               | 54,2                     | 53,7                               | 37,2                                    | 39,8                                      | 115,2                    |
| <b>D+N</b>  | 12,0                                     | 9,5                               | 40,1                     | 49,3                               | 34,1                                    | 55,3                                      | 99,5                     |

UH IS: unique hit integration site. TSS: transcription start site. dist: distance. Med., median.

**Table S4:** Results of the ddPCR measurements of targeted integration within a 235 bp window around the 28S rRNA gene -contained I-PpoI site in MRC-5 cells.

| LV                 | Experiment (replicate) | Copy number per cell          |               |                |                    |                         |                    |                          | Targeted integrations of all integrated vector forms |                   |            |                    |
|--------------------|------------------------|-------------------------------|---------------|----------------|--------------------|-------------------------|--------------------|--------------------------|------------------------------------------------------|-------------------|------------|--------------------|
|                    |                        | Targeted 28S rRNA integration |               |                | All vector genomes | Episomal vector genomes | Production plasmid | Integrated vector copies | Targeted integration                                 |                   |            |                    |
|                    |                        | 28S int. Forw.                | 28S int. Rev. | 28S int. Total | NHEJ               | 1-LTR                   | pLV                | NHEJ-1-LTR-pLV           | % of integrated                                      | Average/replicate | Average/LV | LV                 |
| IN <sub>D64V</sub> | 1                      | 0.000                         | 0.00          | 0.00           | 0.26               | 0.20                    | 0.01               | 0.05                     | 0.0%                                                 | 0.0%              | 0.0%       | IN <sub>D64V</sub> |
|                    |                        | 0.000                         | 0.00          | 0.00           | 0.10               | 0.08                    | 0.00               | 0.02                     | 0.0%                                                 |                   |            |                    |
|                    |                        | 0.000                         | 0.00          | 0.00           | 0.14               | 0.12                    | 0.01               | 0.01                     | 0.0%                                                 |                   |            |                    |
|                    | 2                      | 0.000                         | 0.00          | 0.00           | 0.66               | 0.46                    | 0.54               | -0.35                    | 0.0%                                                 |                   |            |                    |
|                    |                        | 0.000                         | 0.00          | 0.00           | 0.47               | 0.24                    | 0.02               | 0.21                     | 0.1%                                                 |                   |            |                    |
|                    |                        | 0.000                         | 0.00          | 0.00           | 0.75               | 0.12                    | 0.07               | 0.57                     | 0.0%                                                 |                   |            |                    |
| IN <sub>wt</sub>   | 1                      | 0.017                         | 0.01          | 0.03           | 13.67              | 0.88                    | 0.06               | 12.73                    | 0.2%                                                 | 0.1%              | 0.1%       | IN <sub>wt</sub>   |
|                    |                        | 0.010                         | 0.00          | 0.01           | 13.34              | 0.92                    | 0.09               | 12.33                    | 0.1%                                                 |                   |            |                    |
|                    |                        | 0.006                         | 0.01          | 0.01           | 14.29              | 0.78                    | 0.09               | 13.42                    | 0.1%                                                 |                   |            |                    |
|                    | 2                      | 0.006                         | 0.02          | 0.02           | 39.18              | 7.43                    | 0.46               | 31.29                    | 0.1%                                                 |                   |            |                    |
|                    |                        | 0.014                         | 0.01          | 0.02           | 54.60              | 12.02                   | 0.68               | 41.90                    | 0.1%                                                 |                   |            |                    |
|                    |                        | 0.023                         | 0.03          | 0.05           | 59.92              | 17.48                   | 0.40               | 42.04                    | 0.1%                                                 |                   |            |                    |
| D+N                | 1                      | 0.001                         | 0.00          | 0.00           | 1.73               | 1.01                    | 0.13               | 0.59                     | 0.1%                                                 | 0.2%              | 0.2%       | D+N                |
|                    |                        | 0.000                         | 0.00          | 0.00           | 2.26               | 1.47                    | 0.02               | 0.77                     | 0.0%                                                 |                   |            |                    |
|                    |                        | 0.001                         | 0.00          | 0.00           | 1.76               | 1.05                    | 0.03               | 0.68                     | 0.6%                                                 |                   |            |                    |
|                    | 2                      | 0.000                         | 0.00          | 0.00           | 1.08               | 0.21                    | 0.00               | 0.87                     | 0.0%                                                 |                   |            |                    |
|                    |                        | 0.000                         | 0.00          | 0.00           | 0.90               | 0.26                    | 0.03               | 0.61                     | 0.2%                                                 |                   |            |                    |
|                    |                        | 0.000                         | 0.00          | 0.00           | 1.39               | 0.49                    | 0.04               | 0.86                     | 0.0%                                                 |                   |            |                    |
| D+H                | 1                      | 0.047                         | 0.05          | 0.10           | 3.41               | 3.19                    | 0.05               | 0.17                     | 58.8%                                                | 25.3%             | 20.9%      | D+H                |
|                    |                        | 0.036                         | 0.03          | 0.06           | 5.38               | 3.78                    | 0.04               | 1.56                     | 4.1%                                                 |                   |            |                    |
|                    |                        | 0.042                         | 0.05          | 0.09           | 2.58               | 1.87                    | 0.02               | 0.69                     | 13.0%                                                |                   |            |                    |
|                    | 2                      | 0.268                         | 0.24          | 0.51           | 11.88              | 9.72                    | 0.14               | 2.02                     | 25.1%                                                |                   |            |                    |
|                    |                        | 0.269                         | 0.23          | 0.50           | 11.85              | 8.37                    | 0.21               | 3.28                     | 15.1%                                                |                   |            |                    |
|                    |                        | 0.312                         | 0.25          | 0.56           | 10.32              | 3.91                    | 0.16               | 6.26                     | 9.0%                                                 |                   |            |                    |

NHEJ: Non-homologous end joining; int.: integration; 28S: 28S rRNA gene; Forw.: forward; Rev.:Reverse; LTR: long terminal repeat

**Table S5:** ddPCR-based measurement of targeted integration within a 235 bp window around the 28S rRNA gene - contained I-PpoI site in selected and unselected hTERT-RPE1 cells.

| Sample                | Copy number per cell |                  |                         |                          | Targeted integrations of all integrated vector forms |                     |                     |      |
|-----------------------|----------------------|------------------|-------------------------|--------------------------|------------------------------------------------------|---------------------|---------------------|------|
|                       | All vector genomes   | 28S integrations | Episomal vector genomes | Integrated vector copies | Targeted integration                                 |                     |                     |      |
|                       | WPRE                 | 28S int. Forw.   | 1-LTR                   | WPRE-1-LTR               | % of integrated                                      | Average targeting % | Actual targeting %* |      |
| Unselected (d13 p.td) | D+H                  | 0.52             | 0.01                    | 0.20                     | 0.32                                                 | 4.3%                | 4.4%                | 8.8% |
|                       |                      | 0.43             | 0.01                    | 0.16                     | 0.26                                                 | 3.8%                |                     |      |
|                       |                      | 0.50             | 0.01                    | 0.20                     | 0.30                                                 | 4.4%                |                     |      |
|                       |                      | 0.56             | 0.02                    | 0.19                     | 0.37                                                 | 5.1%                |                     |      |
|                       | IN <sub>D64V</sub>   | 0.21             | 0.00                    | 0.13                     | 0.08                                                 | 0.0%                | 0.0%                | 0.0% |
|                       |                      | 0.21             | 0.00                    | 0.07                     | 0.13                                                 | 0.0%                |                     |      |
|                       |                      | 0.21             | 0.00                    | 0.08                     | 0.13                                                 | 0.0%                |                     |      |
| Selected (d15 p.td)   | D+H (replicate 1)    | 2.96             | 0.07                    | 1.11                     | 1.85                                                 | 3.6%                | 4.2%                | 8.4% |
|                       |                      | 3.12             | 0.08                    | 0.79                     | 2.33                                                 | 3.4%                |                     |      |
|                       |                      | 2.56             | 0.08                    | 0.88                     | 1.68                                                 | 5.0%                |                     |      |
|                       |                      | 2.78             | 0.07                    | 1.22                     | 1.56                                                 | 4.7%                |                     |      |
|                       | D+H (replicate 2)    | 3.53             | 0.06                    | 1.50                     | 2.03                                                 | 3.1%                | 3.3%                | 6.6% |
|                       |                      | 3.51             | 0.07                    | 1.46                     | 2.06                                                 | 3.5%                |                     |      |
|                       |                      | 3.42             | 0.07                    | 1.40                     | 2.02                                                 | 3.7%                |                     |      |
|                       |                      | 4.00             | 0.07                    | 1.59                     | 2.41                                                 | 2.8%                |                     |      |
|                       | IN <sub>D64V</sub>   | 1.68             | 0.00                    | 0.35                     | 1.32                                                 | 0.1%                | 0.0%                | 0.1% |
|                       |                      | 1.67             | 0.00                    | 0.31                     | 1.36                                                 | 0.0%                |                     |      |
|                       |                      | 1.64             | 0.00                    | 0.22                     | 1.41                                                 | 0.0%                |                     |      |
|                       |                      | 1.71             | 0.00                    | 0.32                     | 1.39                                                 | 0.0%                |                     |      |
|                       |                      | 1.71             | 0.00                    | 0.32                     | 1.39                                                 | 0.0%                |                     |      |

\* Expected integration targeting efficiency (according to MRC-5 experiments) if 28S-targeted integration was also studied in reverse orientation; d: day; p.td: post transduction; LV: lentivirus vector

**Table S6:** Comparison of lentivirus vector common integration site genes in human mouse hematochimeras with the common integration sites identified in this study using the unique integration sites of LV INwt.

| CIS-associated gene <sup>23</sup> | Alias gene name | Gene present in a CIS of LV INwt? | CIS order of LV INwt |
|-----------------------------------|-----------------|-----------------------------------|----------------------|
| PACS                              |                 | yes                               | 44                   |
| RAB40C                            |                 | yes                               | 33                   |
| HLA                               |                 | yes (HLA-E)                       | 27                   |
| NPLOC4                            |                 | yes                               | 25                   |
| SPDYC                             |                 | yes                               | 17                   |
| SAPS2                             | PPP6R2          | yes                               | 15                   |
| ZGPAT                             |                 | yes                               | 12                   |
| FBXL11                            | KDM2A           | yes                               | 9                    |
| ANKFY1                            |                 | yes                               | 8                    |
| RPA1                              |                 | yes                               | 8                    |
| SMYD4                             |                 | yes                               | 8                    |
| QRICH1                            |                 | yes                               | 8                    |
| USP48                             |                 | yes                               | 7                    |
| FCHSD2                            |                 | yes                               | 7                    |
| SMARCC1                           |                 | yes                               | 7                    |
| NSD1                              |                 | yes                               | 6                    |
| CENTD2                            | ARAP1           | yes                               | 4                    |
| FRYL                              |                 | yes                               | 4                    |
| CARD8                             |                 | yes                               | 4                    |
| EIF2C3                            | AGO3            | yes                               | 3                    |
| PSCD1                             | CYTH1           | yes                               | 3                    |
| NF1                               |                 | yes                               | 3                    |
| ABCA3                             |                 | no                                | na                   |
| CBL                               |                 | no                                | na                   |
| CDC27                             |                 | no                                | na                   |
| HORMAD2                           |                 | no                                | na                   |
| SP1                               |                 | no                                | na                   |
| TAPBP                             |                 | no                                | na                   |
| VAV1                              |                 | no                                | na                   |
| WDR82                             |                 | no                                | na                   |
| GPATCH8                           |                 | no                                | na                   |

LV: lentivirus vector; CIS: common integration site; na: not applicable.

**Table S7:** HIV-1 recurrent integration genes and LV INwt UH-CIS that are within a 100 kb distance from one another.

**Table S8:** DdPCR results of targeted integration detection in primary T cells at day two post transduction.

| Day 2 p. td.                           | Copy number per cell |                          |            |                    |                         |                           | Targeted             |         |
|----------------------------------------|----------------------|--------------------------|------------|--------------------|-------------------------|---------------------------|----------------------|---------|
|                                        | All vector genomes   | Targeted 28S integration |            | Production plasmid | Episomal vector genomes | Integrated vector genomes | Targeted integration |         |
| Sample                                 | NHEJ                 | 28Sint                   | Rev-28Sint | pLV                | 1-LTR                   | NHEJ-pLV-1-LTR            | % targeted           | Average |
| Donor 1 NTD-1                          | 0.00                 | 0.00                     | 0.00       | 0.00               | 0.00                    | 0.00                      | 0.0%                 | 0.0%    |
|                                        | 0.00                 | 0.00                     | 0.00       | 0.00               | 0.00                    | 0.00                      | 0.0%                 |         |
| Donor 1 NTD-2                          | 0.01                 | 0.00                     | 0.00       | 0.00               | 0.00                    | 0.01                      | 0.0%                 | 0.0%    |
|                                        | 0.00                 | 0.00                     | 0.00       | 0.00               | 0.00                    | 0.00                      | 0.0%                 |         |
| Donor 1 INwt, replicate 1, 5K VP/cell  | 28.31                | 0.01                     | 0.01       | 0.47               | 4.32                    | 23.52                     | 0.1%                 | 0.0%    |
|                                        | 28.90                | 0.00                     | 0.00       | 0.44               | 3.49                    | 24.97                     | 0.0%                 |         |
| Donor 1 INwt, replicate 2, 5K VP/cell  | 35.43                | 0.01                     | 0.00       | 0.65               | 4.69                    | 30.09                     | 0.0%                 | 0.0%    |
|                                        | 32.73                | 0.01                     | 0.00       | 0.63               | 5.61                    | 26.49                     | 0.0%                 |         |
| Donor 1 INwt, replicate 1, 10K VP/cell | 31.74                | 0.01                     | 0.00       | 0.57               | 4.84                    | 26.33                     | 0.0%                 | 0.0%    |
|                                        | 35.85                | 0.00                     | 0.00       | 0.59               | 4.53                    | 30.73                     | 0.0%                 |         |
| Donor 1 INwt, replicate 2, 10K VP/cell | 32.83                | 0.01                     | 0.00       | 0.47               | 4.19                    | 28.17                     | 0.0%                 | 0.0%    |
|                                        | 33.50                | 0.01                     | 0.00       | 0.45               | 4.47                    | 28.58                     | 0.0%                 |         |
| Donor 1 D+H, replicate 1, 5K VP/cell   | 17.89                | 0.02                     | 0.03       | 0.51               | 7.53                    | 9.85                      | 0.5%                 | 0.4%    |
|                                        | 19.69                | 0.03                     | 0.02       | 0.48               | 6.64                    | 12.56                     | 0.4%                 |         |
| Donor 1 D+H, replicate 2, 5K VP/cell   | 17.46                | 0.02                     | 0.02       | 0.53               | 5.68                    | 11.25                     | 0.3%                 | 0.6%    |
|                                        | 16.15                | 0.02                     | 0.03       | 0.52               | 6.84                    | 8.79                      | 0.6%                 |         |
| Donor 1 D+H, replicate 1, 10K VP/cell  | 29.27                | 0.05                     | 0.05       | 0.68               | 11.56                   | 17.03                     | 0.6%                 | 0.6%    |
|                                        | 31.36                | 0.04                     | 0.07       | 0.73               | 11.19                   | 19.43                     | 0.6%                 |         |
| Donor 1 D+H, replicate 2, 10K VP/cell  | 28.12                | 0.05                     | 0.05       | 0.63               | 11.06                   | 16.44                     | 0.6%                 | 0.0%    |
|                                        | 27.72                | 0.04                     | 0.05       | 0.64               | 12.51                   | 14.57                     | 0.6%                 |         |
| Donor 2 NTD-1                          | 0.00                 | 0.00                     | 0.00       | 0.00               | 0.00                    | 0.00                      | 0.0%                 | 0.0%    |
|                                        | 0.00                 | 0.00                     | 0.00       | 0.00               | 0.00                    | 0.00                      | 0.0%                 |         |
| Donor 2 NTD-2                          | 0.00                 | 0.00                     | 0.00       | 0.00               | 0.00                    | 0.00                      | 0.0%                 | 0.0%    |
|                                        | 0.00                 | 0.00                     | 0.00       | 0.00               | 0.00                    | 0.00                      | 0.0%                 |         |
| Donor 2 INwt, replicate 1, 5K VP/cell  | 15.26                | 0.00                     | 0.00       | 0.29               | 1.51                    | 13.46                     | 0.0%                 | 0.0%    |
|                                        | 12.39                | 0.00                     | 0.00       | 0.23               | 1.52                    | 10.63                     | 0.0%                 |         |
| Donor 2 INwt, replicate 2, 5K VP/cell  | 16.53                | 0.00                     | 0.00       | 0.31               | 2.31                    | 13.90                     | 0.0%                 | 0.0%    |
|                                        | 17.13                | 0.00                     | 0.00       | 0.32               | 2.32                    | 14.50                     | 0.0%                 |         |
| Donor 2 INwt, replicate 1, 10K VP/cell | 19.06                | 0.00                     | 0.00       | 0.43               | 2.60                    | 16.03                     | 0.0%                 | 0.0%    |
|                                        | 17.37                | 0.00                     | 0.00       | 0.37               | 1.76                    | 15.24                     | 0.0%                 |         |
| Donor 2 INwt, replicate 2, 10K VP/cell | 18.79                | 0.00                     | 0.00       | 0.28               | 2.00                    | 16.50                     | 0.0%                 | 0.0%    |
|                                        | 17.70                | 0.00                     | 0.00       | 0.35               | 1.82                    | 15.53                     | 0.0%                 |         |
| Donor 2 D+H, replicate 1, 5K VP/cell   | 10.10                | 0.01                     | 0.01       | 0.29               | 3.19                    | 6.62                      | 0.4%                 | 0.3%    |
|                                        | 9.99                 | 0.01                     | 0.02       | 0.33               | 2.80                    | 6.86                      | 0.4%                 |         |
| Donor 2 D+H, replicate 2, 5K VP/cell   | 9.38                 | 0.00                     | 0.01       | 0.34               | 2.81                    | 6.23                      | 0.2%                 | 0.3%    |
|                                        | 10.52                | 0.01                     | 0.01       | 0.24               | 2.91                    | 7.37                      | 0.3%                 |         |
| Donor 2 D+H, replicate 1, 10K VP/cell  | 14.44                | 0.02                     | 0.01       | 0.38               | 5.05                    | 9.01                      | 0.3%                 | 0.3%    |
|                                        | 15.44                | 0.02                     | 0.01       | 0.50               | 4.04                    | 10.90                     | 0.3%                 |         |
| Donor 2 D+H, replicate 2, 10K VP/cell  | 26.00                | 0.02                     | 0.02       | 1.16               | 6.92                    | 17.92                     | 0.2%                 | 0.2%    |
|                                        | 21.97                | 0.02                     | 0.01       | 1.12               | 7.05                    | 13.81                     | 0.2%                 |         |

p. td: post transduction; vp: vector particle; NTD: non-transduced cells

**Table S9:** DdPCR results of targeted integration detection in primary T cells at day ten post transduction.

| Day 10 p.td.                           | Copy number per cell |                          |            |                    |                         |                           | Targeted             |         |
|----------------------------------------|----------------------|--------------------------|------------|--------------------|-------------------------|---------------------------|----------------------|---------|
|                                        | All vector genomes   | Targeted 28S integration |            | Production plasmid | Episomal vector genomes | Integrated vector genomes | Targeted integration |         |
| Sample                                 | NHEJ                 | 28Sint                   | Rev-28Sint | pLV                | 1-LTR                   | NHEJ-pLV-1-LTR            | % targeted           | Average |
| Donor 1 NTD-1                          | 0.01                 | 0.00                     | 0.00       | 0.00               | 0.00                    | 0.01                      | 0.0%                 | 0.0%    |
|                                        | 0.00                 | 0.00                     | 0.00       | 0.00               | 0.00                    | 0.00                      | 0.0%                 |         |
| Donor 1 NTD-2                          | 0.00                 | 0.00                     | 0.00       | 0.00               | 0.00                    | 0.00                      | 0.0%                 |         |
|                                        | 0.00                 | 0.00                     | 0.00       | 0.00               | 0.00                    | 0.00                      | 0.0%                 |         |
| Donor 1 INwt, replicate 1, 5K VP/cell  | 6.10                 | 0.00                     | 0.00       | 0.04               | 0.19                    | 5.87                      | 0.1%                 | 0.1%    |
|                                        | 6.51                 | 0.00                     | 0.00       | 0.02               | 0.26                    | 6.23                      | 0.1%                 |         |
| Donor 1 INwt, replicate 2, 5K VP/cell  | 6.75                 | 0.00                     | 0.00       | 0.02               | 0.24                    | 6.49                      | 0.1%                 |         |
|                                        | 6.51                 | 0.00                     | 0.00       | 0.04               | 0.26                    | 6.21                      | 0.1%                 |         |
| Donor 1 INwt, replicate 1, 10K VP/cell | 8.50                 | 0.00                     | 0.00       | 0.03               | 0.34                    | 8.13                      | 0.0%                 | 0.0%    |
|                                        | 8.71                 | 0.00                     | 0.00       | 0.03               | 0.31                    | 8.37                      | 0.1%                 |         |
| Donor 1 INwt, replicate 2, 10K VP/cell | 8.37                 | 0.00                     | 0.00       | 0.04               | 0.37                    | 7.95                      | 0.1%                 |         |
|                                        | 7.77                 | 0.00                     | 0.00       | 0.05               | 0.24                    | 7.49                      | 0.1%                 |         |
| Donor 1 D+H, replicate 1, 5K VP/cell   | 0.35                 | 0.00                     | 0.00       | 0.01               | 0.12                    | 0.22                      | 1.3%                 | 4.4%    |
|                                        | 0.33                 | 0.01                     | 0.01       | 0.01               | 0.09                    | 0.24                      | 4.7%                 |         |
| Donor 1 D+H, replicate 2, 5K VP/cell   | 0.29                 | 0.01                     | 0.01       | 0.01               | 0.10                    | 0.19                      | 7.8%                 |         |
|                                        | 0.27                 | 0.00                     | 0.01       | 0.00               | 0.08                    | 0.19                      | 3.6%                 |         |
| Donor 1 D+H, replicate 1, 10K VP/cell  | 0.47                 | 0.00                     | 0.01       | 0.01               | 0.15                    | 0.30                      | 4.3%                 | 4.8%    |
|                                        | 0.49                 | 0.01                     | 0.01       | 0.00               | 0.15                    | 0.33                      | 4.4%                 |         |
| Donor 1 D+H, replicate 2, 10K VP/cell  | 0.53                 | 0.01                     | 0.01       | 0.00               | 0.14                    | 0.39                      | 5.6%                 |         |
|                                        | 0.51                 | 0.01                     | 0.01       | 0.01               | 0.16                    | 0.35                      | 5.1%                 |         |
| Donor 2 NTD-1                          | 0.00                 | 0.00                     | 0.00       | 0.00               | 0.00                    | 0.00                      | 0.0%                 | 0.0%    |
|                                        | 0.00                 | 0.00                     | 0.00       | 0.00               | 0.00                    | 0.00                      | 0.0%                 |         |
| Donor 2 NTD-2                          | 0.00                 | 0.00                     | 0.00       | 0.00               | 0.00                    | 0.00                      | 0.0%                 |         |
|                                        | 0.00                 | 0.00                     | 0.00       | 0.00               | 0.00                    | 0.00                      | 0.0%                 |         |
| Donor 2 INwt, replicate 1, 5K VP/cell  | 2.60                 | 0.00                     | 0.00       | 0.00               | 0.12                    | 2.48                      | 0.1%                 | 0.1%    |
|                                        | 2.40                 | 0.00                     | 0.00       | 0.00               | 0.08                    | 2.32                      | 0.0%                 |         |
| Donor 2 INwt, replicate 2, 5K VP/cell  | 2.37                 | 0.00                     | 0.00       | 0.00               | 0.12                    | 2.25                      | 0.2%                 |         |
|                                        | 2.41                 | 0.00                     | 0.00       | 0.02               | 0.10                    | 2.29                      | 0.0%                 |         |
| Donor 2 INwt, replicate 1, 10K VP/cell | 3.21                 | 0.00                     | 0.00       | 0.03               | 0.14                    | 3.04                      | 0.0%                 | 0.1%    |
|                                        | 3.03                 | 0.00                     | 0.00       | 0.04               | 0.07                    | 2.91                      | 0.0%                 |         |
| Donor 2 INwt, replicate 2, 10K VP/cell | 3.26                 | 0.00                     | 0.00       | 0.01               | 0.12                    | 3.13                      | 0.1%                 |         |
|                                        | 3.64                 | 0.00                     | 0.01       | 0.06               | 0.09                    | 3.49                      | 0.2%                 |         |
| Donor 2 D+H, replicate 1, 5K VP/cell   | 0.14                 | 0.00                     | 0.00       | 0.00               | 0.03                    | 0.12                      | 5.0%                 | 2.7%    |
|                                        | 0.26                 | 0.00                     | 0.00       | 0.00               | 0.07                    | 0.19                      | 0.7%                 |         |
| Donor 2 D+H, replicate 2, 5K VP/cell   | 0.13                 | 0.00                     | 0.00       | 0.01               | 0.07                    | 0.05                      | 0.0%                 |         |
|                                        | 0.10                 | 0.00                     | 0.00       | 0.00               | 0.04                    | 0.06                      | 5.2%                 |         |
| Donor 2 D+H, replicate 1, 10K VP/cell  | 0.15                 | 0.00                     | 0.00       | 0.01               | 0.03                    | 0.12                      | 5.7%                 | 3.9%    |
|                                        | 0.11                 | 0.00                     | 0.00       | 0.00               | 0.01                    | 0.10                      | 0.0%                 |         |
| Donor 2 D+H, replicate 2, 10K VP/cell  | 0.34                 | 0.00                     | 0.01       | 0.02               | 0.12                    | 0.20                      | 3.7%                 |         |
|                                        | 0.29                 | 0.01                     | 0.00       | 0.01               | 0.14                    | 0.14                      | 6.0%                 |         |

p. td: post transduction; vp: vector particle; NTD: non-transduced cells



**Table S10:** Quantification of the DJ region and the 18S rRNA gene copies in the genomes of primary T cells at day two post transduction.

| Sample                                 | CN DJ | Average DJ | CN 18SrRNA | Average 18SrRNA |
|----------------------------------------|-------|------------|------------|-----------------|
| Donor 1 NTD-1                          | 17.31 | 17.63      | 594.53     | 501.93          |
|                                        | 17.13 |            | 369.54     |                 |
| Donor 1 NTD-2                          | 18.63 |            | 514.97     |                 |
|                                        | 17.46 |            | 528.68     |                 |
| Donor 1 INwt, replicate 1, 10K VP/cell | 18.51 | 17.85      | 676.39     | 682.76          |
|                                        | 17.40 |            | 754.53     |                 |
| Donor 1 INwt, replicate 2, 10K VP/cell | 18.14 |            | 456.37     |                 |
|                                        | 17.36 |            | 843.77     |                 |
| Donor 1 D+H, replicate 1, 10K VP/cell  | 18.98 | 16.54      | 535.81     | 701.19          |
|                                        | 14.71 |            | 490.89     |                 |
| Donor 1 D+H, replicate 2, 10K VP/cell  | 16.49 |            | 1 040.95   |                 |
|                                        | 16.00 |            | 737.11     |                 |
| Donor 2 NTD-1                          | 13.23 | 13.14      | 484.96     | 478.25          |
|                                        | 12.21 |            | 451.65     |                 |
| Donor 2 NTD-2                          | 15.05 |            | 614.73     |                 |
|                                        | 12.10 |            | 361.67     |                 |
| Donor 2 INwt, replicate 1, 10K VP/cell | 13.89 | 14.33      | 690.84     | 538.84          |
|                                        | 13.62 |            | 740.72     |                 |
| Donor 2 INwt, replicate 2, 10K VP/cell | 14.15 |            | 370.03     |                 |
|                                        | 15.66 |            | 353.77     |                 |
| Donor 2 D+H, replicate 1, 10K VP/cell  | 12.98 | 13.85      | 607.67     | 659.56          |
|                                        | 12.90 |            | 649.42     |                 |
| Donor 2 D+H, replicate 2, 10K VP/cell  | 14.48 |            | 862.98     |                 |
|                                        | 15.05 |            | 518.17     |                 |

CN: copy number; DJ: distal junction; vp: vector particle; NTD: non-transduced cells.

**Table S11:** RT-ddPCR measurements of provirus transcripts originating from the 28S rRNA gene locus in primary T cells at day two post transduction.

| Day 2 p. td.                           | Gene expression ratio to control assay |                     |                                                                              |                       | Gene expression ratio comparison                         |
|----------------------------------------|----------------------------------------|---------------------|------------------------------------------------------------------------------|-----------------------|----------------------------------------------------------|
|                                        | Total provirus expression              |                     | Provirus transcripts from the 28S rRNA locus (sense-orientation integration) |                       | 28S rRNA locus transcripts of total provirus transcripts |
| Sample                                 | Ratio (WPRE/IPO8)                      | Average (WPRE/IPO8) | Ratio (28Sint/IPO8)                                                          | Average (28Sint/IPO8) | 28Sint-ratio/ WPRE-ratio                                 |
| Donor 1 NTD-1                          | 0.00                                   | <b>0.00</b>         | 0.00                                                                         | <b>0.00</b>           | <b>0.0 %</b>                                             |
|                                        | 0.00                                   |                     | 0.00                                                                         |                       |                                                          |
| Donor 1 NTD-2                          | 0.00                                   | <b>0.00</b>         | 0.00                                                                         | <b>0.00</b>           | <b>0.0 %</b>                                             |
|                                        | 0.00                                   |                     | 0.00                                                                         |                       |                                                          |
| Donor 1 INwt, replicate 1, 5K VP/cell  | 19.51                                  | <b>25.36</b>        | 0.00                                                                         | <b>0.00</b>           | <b>0.0 %</b>                                             |
|                                        | <i>2 030.04</i>                        |                     | 0.00                                                                         |                       |                                                          |
| Donor 1 INwt, replicate 2, 5K VP/cell  | 28.66                                  | <b>25.36</b>        | 0.00                                                                         | <b>0.00</b>           | <b>0.0 %</b>                                             |
|                                        | 27.93                                  |                     | 0.00                                                                         |                       |                                                          |
| Donor 1 INwt, replicate 1, 10K VP/cell | <i>1 875.80</i>                        | <b>22.70</b>        | 0.00                                                                         | <b>0.00</b>           | <b>0.0 %</b>                                             |
|                                        | <i>1 893.12</i>                        |                     | 0.00                                                                         |                       |                                                          |
| Donor 1 INwt, replicate 2, 10K VP/cell | <i>2 116.56</i>                        | <b>22.70</b>        | 0.00                                                                         | <b>0.00</b>           | <b>0.0 %</b>                                             |
|                                        | 22.70                                  |                     | 0.00                                                                         |                       |                                                          |
| Donor 1 D+H, replicate 1, 5K VP/cell   | 1.81                                   | <b>2.64</b>         | 0.01                                                                         | <b>0.00</b>           | <b>0.1 %</b>                                             |
|                                        | 1.82                                   |                     | 0.00                                                                         |                       |                                                          |
| Donor 1 D+H, replicate 2, 5K VP/cell   | 3.15                                   | <b>2.64</b>         | 0.00                                                                         | <b>0.00</b>           | <b>0.1 %</b>                                             |
|                                        | 3.77                                   |                     | 0.00                                                                         |                       |                                                          |
| Donor 1 D+H, replicate 1, 10K VP/cell  | 3.19                                   | <b>3.04</b>         | 0.03                                                                         | <b>0.03</b>           | <b>0.8 %</b>                                             |
|                                        | 3.21                                   |                     | 0.03                                                                         |                       |                                                          |
| Donor 1 D+H, replicate 2, 10K VP/cell  | 2.79                                   | <b>3.04</b>         | 0.02                                                                         | <b>0.03</b>           | <b>0.8 %</b>                                             |
|                                        | 2.96                                   |                     | 0.02                                                                         |                       |                                                          |
| Donor 2 NTD-1                          | 0.01                                   | <b>0.00</b>         | 0.00                                                                         | <b>0.00</b>           | <b>0.0 %</b>                                             |
|                                        | 0.00                                   |                     | 0.00                                                                         |                       |                                                          |
| Donor 2 NTD-2                          | 0.00                                   | <b>0.00</b>         | 0.00                                                                         | <b>0.00</b>           | <b>0.0 %</b>                                             |
|                                        | 0.00                                   |                     | 0.00                                                                         |                       |                                                          |
| Donor 2 INwt, replicate 1, 5K VP/cell  | 14.07                                  | <b>12.71</b>        | 0.00                                                                         | <b>0.00</b>           | <b>0.0 %</b>                                             |
|                                        | 14.72                                  |                     | 0.00                                                                         |                       |                                                          |
| Donor 2 INwt, replicate 2, 5K VP/cell  | 11.03                                  | <b>12.71</b>        | 0.00                                                                         | <b>0.00</b>           | <b>0.0 %</b>                                             |
|                                        | 11.01                                  |                     | 0.00                                                                         |                       |                                                          |
| Donor 2 INwt, replicate 1, 10K VP/cell | 16.67                                  | <b>14.54</b>        | 0.00                                                                         | <b>0.00</b>           | <b>0.0 %</b>                                             |
|                                        | 14.44                                  |                     | 0.00                                                                         |                       |                                                          |
| Donor 2 INwt, replicate 2, 10K VP/cell | 11.21                                  | <b>14.54</b>        | 0.00                                                                         | <b>0.00</b>           | <b>0.0 %</b>                                             |
|                                        | 15.83                                  |                     | 0.00                                                                         |                       |                                                          |
| Donor 2 D+H, replicate 1, 5K VP/cell   | 1.45                                   | <b>1.25</b>         | 0.01                                                                         | <b>0.01</b>           | <b>0.4 %</b>                                             |
|                                        | 1.42                                   |                     | 0.01                                                                         |                       |                                                          |
| Donor 2 D+H, replicate 2, 5K VP/cell   | 1.02                                   | <b>1.25</b>         | 0.00                                                                         | <b>0.01</b>           | <b>0.4 %</b>                                             |
|                                        | 1.10                                   |                     | 0.00                                                                         |                       |                                                          |
| Donor 2 D+H, replicate 1, 10K VP/cell  | 1.47                                   | <b>2.39</b>         | 0.01                                                                         | <b>0.01</b>           | <b>0.3 %</b>                                             |
|                                        | 1.43                                   |                     | 0.01                                                                         |                       |                                                          |
| Donor 2 D+H, replicate 2, 10K VP/cell  | 3.35                                   | <b>2.39</b>         | 0.01                                                                         | <b>0.01</b>           | <b>0.3 %</b>                                             |
|                                        | 3.30                                   |                     | 0.01                                                                         |                       |                                                          |

p. td: post transduction; vp: vector particle; NTD: non-transduced cells  
*value too high to reliably quantitate; not included in average*

**Table S12:** RT-ddPCR measurements of provirus transcripts originating from the 28S rRNA gene locus in primary T cells at day ten post transduction.

| Day 10 p.td.                           | Gene expression ratio to control assay |                     |                                                                              |                       | Gene expression ratio comparison                         |
|----------------------------------------|----------------------------------------|---------------------|------------------------------------------------------------------------------|-----------------------|----------------------------------------------------------|
|                                        | Total provirus expression              |                     | Provirus transcripts from the 28S rRNA locus (sense-orientation integration) |                       | 28S rRNA locus transcripts of total provirus transcripts |
| Sample                                 | Ratio (WPRE/IPO8)                      | Average (WPRE/IPO8) | Ratio (28Sint/IPO8)                                                          | Average (28Sint/IPO8) | 28Sint-ratio/ WPRE-ratio                                 |
| Donor 1 NTD-1                          | 0.00                                   | <b>0.00</b>         | 0.00                                                                         | <b>0.000</b>          | <b>0.0 %</b>                                             |
|                                        | 0.00                                   |                     | 0.00                                                                         |                       |                                                          |
| Donor 1 NTD-2                          | 0.00                                   | <b>0.00</b>         | 0.00                                                                         | <b>0.000</b>          | <b>0.0 %</b>                                             |
|                                        | 0.00                                   |                     | 0.00                                                                         |                       |                                                          |
| Donor 1 INwt, replicate 1, 5K VP/cell  | 11.60                                  | <b>12.70</b>        | 0.00                                                                         | <b>0.000</b>          | <b>0.0 %</b>                                             |
|                                        | 11.01                                  |                     | 0.00                                                                         |                       |                                                          |
| Donor 1 INwt, replicate 2, 5K VP/cell  | 12.54                                  | <b>12.70</b>        | 0.00                                                                         | <b>0.000</b>          | <b>0.0 %</b>                                             |
|                                        | 13.97                                  |                     | 0.00                                                                         |                       |                                                          |
| Donor 1 INwt, replicate 1, 10K VP/cell | 31.27                                  | <b>23.67</b>        | 0.00                                                                         | <b>0.000</b>          | <b>0.0 %</b>                                             |
|                                        | 29.89                                  |                     | 0.00                                                                         |                       |                                                          |
| Donor 1 INwt, replicate 2, 10K VP/cell | 16.24                                  | <b>23.67</b>        | 0.00                                                                         | <b>0.000</b>          | <b>0.0 %</b>                                             |
|                                        | 17.31                                  |                     | 0.00                                                                         |                       |                                                          |
| Donor 1 D+H, replicate 1, 5K VP/cell   | 0.63                                   | <b>0.63</b>         | 0.01                                                                         | <b>0.013</b>          | <b>2.0 %</b>                                             |
|                                        | 0.61                                   |                     | 0.01                                                                         |                       |                                                          |
| Donor 1 D+H, replicate 2, 5K VP/cell   | 0.65                                   | <b>0.63</b>         | 0.01                                                                         | <b>0.013</b>          | <b>2.0 %</b>                                             |
|                                        | 0.64                                   |                     | 0.01                                                                         |                       |                                                          |
| Donor 1 D+H, replicate 1, 10K VP/cell  | 1.67                                   | <b>1.41</b>         | 0.00                                                                         | <b>0.007</b>          | <b>0.5 %</b>                                             |
|                                        | 1.65                                   |                     | 0.00                                                                         |                       |                                                          |
| Donor 1 D+H, replicate 2, 10K VP/cell  | 1.19                                   | <b>1.41</b>         | 0.01                                                                         | <b>0.007</b>          | <b>0.5 %</b>                                             |
|                                        | 1.14                                   |                     | 0.01                                                                         |                       |                                                          |
| Donor 2 NTD-1                          | 0.01                                   | <b>0.00</b>         | 0.00                                                                         | <b>0.000</b>          | <b>0.0 %</b>                                             |
|                                        | 0.00                                   |                     | 0.00                                                                         |                       |                                                          |
| Donor 2 NTD-2                          | 0.00                                   | <b>0.00</b>         | 0.00                                                                         | <b>0.000</b>          | <b>0.0 %</b>                                             |
|                                        | 0.00                                   |                     | 0.00                                                                         |                       |                                                          |
| Donor 2 INwt, replicate 1, 5K VP/cell  | 4.58                                   | <b>6.88</b>         | 0.00                                                                         | <b>0.000</b>          | <b>0.0 %</b>                                             |
|                                        | 4.61                                   |                     | 0.00                                                                         |                       |                                                          |
| Donor 2 INwt, replicate 2, 5K VP/cell  | 8.84                                   | <b>6.88</b>         | 0.00                                                                         | <b>0.000</b>          | <b>0.0 %</b>                                             |
|                                        | 9.46                                   |                     | 0.00                                                                         |                       |                                                          |
| Donor 2 INwt, replicate 1, 10K VP/cell | 9.25                                   | <b>7.58</b>         | 0.00                                                                         | <b>0.000</b>          | <b>0.0 %</b>                                             |
|                                        | 9.01                                   |                     | 0.00                                                                         |                       |                                                          |
| Donor 2 INwt, replicate 2, 10K VP/cell | 6.16                                   | <b>7.58</b>         | 0.00                                                                         | <b>0.000</b>          | <b>0.0 %</b>                                             |
|                                        | 5.91                                   |                     | 0.00                                                                         |                       |                                                          |
| Donor 2 D+H, replicate 1, 5K VP/cell   | 0.65                                   | <b>0.72</b>         | 0.00                                                                         | <b>0.001</b>          | <b>0.2 %</b>                                             |
|                                        | 0.59                                   |                     | 0.00                                                                         |                       |                                                          |
| Donor 2 D+H, replicate 2, 5K VP/cell   | 0.75                                   | <b>0.72</b>         | 0.00                                                                         | <b>0.001</b>          | <b>0.2 %</b>                                             |
|                                        | 0.90                                   |                     | 0.00                                                                         |                       |                                                          |
| Donor 2 D+H, replicate 1, 10K VP/cell  | 0.00                                   | <b>3.83</b>         | 0.04                                                                         | <b>0.009</b>          | <b>0.2 %</b>                                             |
|                                        | 0.18                                   |                     | 0.00                                                                         |                       |                                                          |
| Donor 2 D+H, replicate 2, 10K VP/cell  | 7.41                                   | <b>3.83</b>         | 0.00                                                                         | <b>0.009</b>          | <b>0.2 %</b>                                             |
|                                        | 7.74                                   |                     | 0.00                                                                         |                       |                                                          |

p. td: post transduction; vp: vector particle; NTD: non-transduced cells

**File S1:** CIS analysis of all LVs.

**File S2:** Enriched GO terms in the CIS-associated genes of the analyzed LVs.

## Supplemental Methods

Primer and linker sequences used for the extraction of LV integration sites.

| Primer Name                        | Primer Sequence (5'-3')                                                                    |
|------------------------------------|--------------------------------------------------------------------------------------------|
| ForwA + MID13 HIV LTR primer, PCR2 | CCATCTCATCCCTGCGTGTCTCCGACTCAGCATAGTAGTGAGACCCTTTTAGTCAGTGTGGAAAATC                        |
| ForwA + MID14 HIV LTR primer, PCR2 | CCATCTCATCCCTGCGTGTCTCCGACTCAGCGAGAGATACAGACCCTTTTAGTCAGTGTGGAAAATC                        |
| ForwA + MID15 HIV LTR primer, PCR2 | CCATCTCATCCCTGCGTGTCTCCGACTCAGATACGACGTAAGACCCTTTTAGTCAGTGTGGAAAATC                        |
| ForwA + MID16 HIV LTR primer, PCR2 | CCATCTCATCCCTGCGTGTCTCCGACTCAGTCACGTAAGACCCTTTTAGTCAGTGTGGAAAATC                           |
| ForwA + MID17 HIV LTR primer, PCR2 | CCATCTCATCCCTGCGTGTCTCCGACTCAGCGTCTAGTACAGACCCTTTTAGTCAGTGTGGAAAATC                        |
| ForwA + MID18 HIV LTR primer, PCR2 | CCATCTCATCCCTGCGTGTCTCCGACTCAGTCTACGTAGCAGACCCTTTTAGTCAGTGTGGAAAATC                        |
| Rev_P1b+ad4_PCR2                   | CACTACGCCTCCGCTTTCTCTCTATGGGCAGTCGGTGACATTGCTTCTCCACTAGAG                                  |
| Rev_P1b+ad6_PCR2                   | CACTACGCCTCCGCTTTCTCTCTATGGGCAGTCGGTGAACCTTGCACTTCTGACCTAGCT                               |
| Rev_P1b+ad7_PCR2                   | CACTACGCCTCCGCTTTCTCTCTATGGGCAGTCGGTGAGACGAGTCAGTCTACTAAAG                                 |
| Rev_P1b+ad8_PCR2                   | CACTACGCCTCCGCTTTCTCTCTATGGGCAGTCGGTGAACGCGAGCCAGACTCCATATT                                |
| Rev_P1b+ad9_PCR2                   | CACTACGCCTCCGCTTTCTCTCTATGGGCAGTCGGTGATCGCTAGAGTACGGCCTTGAA                                |
| Rev_P1b+ad10_PCR2                  | CACTACGCCTCCGCTTTCTCTCTATGGGCAGTCGGTGATATTGAGAGAGGGAAAGAGGC                                |
| L4 PCR1 primer                     | TTCAGGAGGTCACCTTCGCACAT                                                                    |
| L6 PCR1 primer                     | TAGACCGCTCAGAGGTCATACT                                                                     |
| L7 PCR1 primer                     | CATCGTCGACACACGTGATGAC                                                                     |
| L8 PCR1 primer                     | TATGCGGGACAGGTAATACGCG                                                                     |
| L9 PCR1 primer                     | GGAATCTATGTAGCAGGTCGCT                                                                     |
| L10 PCR1 primer                    | CGCTTTGAGCTATGAACCTAT                                                                      |
| MuL4 anneal                        | TTCAGGAGGTCACCTTCGCACATTGCTTCTTCCACTAGAGTGTTCGCAATTTATCGTGAAACGCTTTCGCGTTTTTCGTGCGCCGCTTCA |
| MuL6 anneal                        | TAGACCGCTCAGAGGTCATACTTGCACTTCTGACCTAGCTTGTTCGCAATTTATCGTGAAACGCTTTCGCGTTTTTCGTGCGCCGCTTCA |
| MuL7 anneal                        | CATCGTCGACACACGTGATGACGAGTCAGTCTACTAAAGTGTTCGCAATTTATCGTGAAACGCTTTCGCGTTTTTCGTGCGCCGCTTCA  |
| MuL8 anneal                        | TATGCGGGACAGGTAATACGCGAGCCAGACTCCATATTTGTTTTGCAATTTATCGTGAAACGCTTTCGCGTTTTTCGTGCGCCGCTTCA  |
| MuL9 anneal                        | GGAATCTATGTAGCAGGTCGCTAGAGTACGGCCTTGAATGTTTTGCAATTTATCGTGAAACGCTTTCGCGTTTTTCGTGCGCCGCTTCA  |
| MuL10 anneal                       | CGCTTTGAGCTATGAACCTATTGAGAGAGGGAAAGAGGCTGTTTTGCAATTTATCGTGAAACGCTTTCGCGTTTTTCGTGCGCCGCTTCA |
| Mu -- Donor                        | TCGGATGAAGCGGCGCACGAAAAACGGAAGCGTTTTACGATAAATGCGAAAACA/3AmMC7/                             |
| HIVLTR primer,PCR1                 | CTTAAGCCTCAATAAAGCTTCGCTTGAG                                                               |

Details of the materials used in ddPCR.

| Product                                             | Bio-Rad Cat. No. | Manufacturing origin |
|-----------------------------------------------------|------------------|----------------------|
| Droplet generation oil for probes                   | 1863005          | USA                  |
| Droplet reader oil                                  | 1863004          | USA                  |
| DG8™ Cartridges for QX200™/QX100™ Droplet Generator | 1864008          | Germany              |
| DG8™ Gaskets for QX200™/QX100™ Droplet Generator    | 1863009          | USA                  |
| ddPCR™ 96-Well Plates                               | 12001925         | USA                  |
| Piercable foil heat seal                            | 1814040          | UK                   |
| Supermix for probes (no dUTP)                       | 1863025          | USA                  |

Primers and design of the ddPCR and RT-ddPCR assays used to estimate integration targeting near the I-PpoI site and transcription from the 28S rRNA gene locus.

| Primer Name    | Primer Sequence (5'-3')     | Assay          | Used in assay to detect                                                                                                                                                      |
|----------------|-----------------------------|----------------|------------------------------------------------------------------------------------------------------------------------------------------------------------------------------|
| 28Sint_FW      | GCTCTCTGGCTAACTAGGGAA       | 28S int. Forw. | Transgene integration in the I-PpoI recognition site in the 28S rRNA gene (sense orientation); detection of transgene transcripts from the 28S rRNA gene locus with RT-ddPCR |
| 28Sint_REV     | GTTTCATCCATTCATGCGCG        |                |                                                                                                                                                                              |
| 28Sint_int     | TGTGCCCGTCTGTTGTGTGACTCTGGT |                |                                                                                                                                                                              |
| Rev-28Sint_FW  | AGCAGTGGGTTCCCTAGTTA        | 28S int.Rev.   | Transgene integration in the I-PpoI recognition site in the 28S rRNA gene (antisense orientation)                                                                            |
| Rev-28Sint_REV | GTTTCATCCATTCATGCGCG        |                |                                                                                                                                                                              |
| Rev-28Sint_int | CCAGAGAGCTCCAGGCTCAGATCTGG  |                |                                                                                                                                                                              |
| 1-LTR FW       | GCTCGGTACCTTTAAGACCA        | 1-LTR          | Episomal vector genomes                                                                                                                                                      |
| 1-LTR REV      | GTTTCCTTTTCGCTTTCAGG        |                |                                                                                                                                                                              |
| 1-LTR int      | AGTCAGTGTGGAAAATCTCTAGCAGTG |                |                                                                                                                                                                              |
| NHEJ_fw        | GGAAAATCTCTAGCAGTGGC        | NHEJ           | All vector genomes (MRC-5 and T cell integration targeting efficiency measurements)                                                                                          |
| NHEJ_rev       | CCCGCTTAATACTGACGCT         |                |                                                                                                                                                                              |
| NHEJ_int       | GCAAGAGGCGAGGGGCGGCG        |                |                                                                                                                                                                              |
| pLV-fw         | GCCTTGAGTGCTTCAAGTAG        | pLV            | Production plasmid carry-over (transgene construct)                                                                                                                          |
| pLV-rev        | CAAGTTCCTCTACTCTCTG         |                |                                                                                                                                                                              |
| pLV-int        | TGTGCCCGTCTGTTGTGTGACTCTGGT |                |                                                                                                                                                                              |
| WPRE_FW        | CACTGACAATTCCGTGGTGT        | WPRE           | All vector genomes (hTERT-RPE1 integration targeting efficiency measurements; RT-ddPCR)                                                                                      |
| WPRE_REV       | CAGAATCCAGGTGGCAACA         |                |                                                                                                                                                                              |
| WPRE_int       | ACGTCCTTTCCATGGCTGCTCGCCT   |                |                                                                                                                                                                              |
| DJgRNA3_FW     | CATTTCCCAGCTTCCAGGAT        | DJ             | Quantification of possible deletions of the distal junction (DJ) sequences                                                                                                   |
| DJgRNA3_REV    | AGGAGCTTGGGATCTGTCTC        |                |                                                                                                                                                                              |
| DJgRNA3_int    | TCGCAGGGCAACAGGGGCTGTGA     |                |                                                                                                                                                                              |
| 18SrRNA_FW     | CGCTACTACCGATTGGATGG        | 18S            | Quantification of possible deletions of the 18S rRNA gene copies                                                                                                             |
| 18SrRNA_REV    | CAAGTTCGACCGTCTTCTCA        |                |                                                                                                                                                                              |
| 18SrRNA_int    | AGGCCCTCGGATCGGCCCG         |                |                                                                                                                                                                              |

Reference gene assays: PrimePCR ddPCR Copy Number Assay:RPP30, Human (Bio-Rad Assay ID dHsaCP2500350)

PrimePCR ddPCR Expression Probe Assay:IPO8, Human (Bio-Rad Assay ID dHsaCPE5044719)

All assays from Bio-Rad (made in US); Dyes: 5' 6-FAM/HEX, quencher 3' Iowa Black FQ

PCR program used in ddPCR assays.

| Program: |       |      |
|----------|-------|------|
| 95 °C    | 10:00 | 50 x |
| 94 °C    | 1:00  |      |
| 61 °C    | 2:00  |      |
| 98 °C    | 10:00 |      |
| 4 °C     | hold  |      |
